# Supplementary material
Source: publisher figshare collection journal article supplement (https://brill.figshare.com/ndownloader/files/17866634)
Supplement: Supplementary file 1 [file 17866634]

#NEXUS
[written Wed Feb 07 16:19:22 ART 2018 by Mesquite  version 3.10 (build 765) at Alfred-PC/166.82.4.56]

BEGIN TAXA;
	DIMENSIONS NTAX=51;
	TAXLABELS
		Acanthochelys_macrocephala Acanthochelys_pallidipectoris Acanthochelys_radiolata Acanthochelys_spixii Chelodina_colliei Chelodina_expansa Chelodina_longicollis Chelodina_novaeguineae Chelodina_oblonga Chelodina_pritchardi Chelus_fimbriata Elseya_albagula Elseya_branderhorsti Elseya_dentata Elseya_irwini Elseya_lavarackorum Elseya_novaeguineae Elusor_macrurus Emydura_macquarii Emydura_subglobosa Emydura_tanybaraga Emydura_victoriae Erymnochelys_madagascariensis Flaviemys_purvisi Hydromedusa_maximiliani Hydromedusa_tectifera Mesoclemmys_dahli Mesoclemmys_gibba Mesoclemmys_heliostemma Mesoclemmys_hogei Mesoclemmys_nasuta Mesoclemmys_raniceps Mesoclemmys_tuberculatus Mesoclemmys_vanderhaegei Mesoclemmys_zuliae Myuchelys_bellii Myuchelys_georgesi Myuchelys_latisternum Pelomedusa_subrufa Peltocephalus_dumerilianus Pelusios_sinuatus Phrynops_geoffroanus Phrynops_hilarii Phrynops_williamsi Platemys_platycephala Podocnemis_expansa Podocnemis_sextuberculata Podocnemis_unifilis Pseudemydura_umbrina Rheodytes_leukops Rhinemys_rufipes
;

END;


BEGIN CHARACTERS;
	DIMENSIONS  NCHAR=7815;
	FORMAT DATATYPE = DNA GAP = - MISSING = ?;
	MATRIX
Chelodina_oblonga		CCCTAAACTC-AGATTCCATAACCAACATAAAGAATCCGCCAGAGAA-CTACAAACCAAACGTTTAAAACTCAAAGGACTTGGCGG-TGCTTCAAA-CCCACCTAGAGGAGCCTGTTCTATAATCGATAATCCACGATCCACCTCACCATCTCTAGCCC-GC-AGCCTATATACCTCCGTCTACAGCTTACCTCATGAGGGAGC-AAAAGTAAGCACCATAGTTAA-TACAA--CTAACAAGTCAGGTCAAGGTGTAGCCAACTGAGATGGAAGAAATGGGCTACATTTTCTATGT--TAGAATTAA--TTCA-C---GGAAAGAGCCCTGAAAA-CATTGCTCT-AAAAGCAGGATTTAGCAGTAATATG-AGAATAGAGAGCTCATATTAACAAGGACCTGA-AGCGCGCACACACCGCCCGTCACCCTCCTCAAAAA?AGGGGTGATGCCTGCCCGGTGACACTGTTTAACGGCCG-CGGTATCCTGACCGTGCGAAGGTAGCATAATCACTCGTCTTTTAAATAAAGACTAGAATGAATGGCTAAACGAG-GCTCTACCTGTCTCTTACAAA-CTATCAGTGAAATTGATCTCCTCGTGCAAAAGCGAGAATATCCACATAAGACGAGAAGACCCTGTGGAACTTTAAGT--ATAAGTCA--ACTACTAAATTAAA-ACTCCAACTCTACTTGA-GACACTACATACAA-TTAC-TTGACC--CTACTTTCGGTTGGGGTGACCTTGGAGAACAATAAAACCTCCAAAAA-TATAT-----------ACCAAGAT-TAACACACCAAAGTGCC-CAAGGCA--AAACGATCCAATACATTTGATCAACGAACCAAGCTACCCCAGGGATAACAGCGCAATCCCCTCTTAGAGC-CCATATCAACGATGGGGGTTTACGACCTCGATGTTGGATCAGGACATCCTAATGGTGCAGCCGCTATTAAGGGTTCTATACTTAATCTTTGGGGCCTGAGCAGGAATAATCGGAACAGCCCTCAGTCTATTAATCCGAACAGAGCTAAGTCAACCAGGACCCCTAATAGGAGATGACCAAGTGTACAACGTTATTGTTACCGCCCATGCTTTCATCATAATCTTCTTCATGGTAATACCCATTATAATTGGGGGTTTCGGAAACTGATTAGTTCCAATAATAATTGGAGCACCAGACATAGCTTTCCCACGAATAAACAACATAAGCTTCTGACTACTACCCCCATCACTGCTTCTTTTACTAGCATCATCAGGAATTGAAGCTGGAGCCGGGACAGGGTGAACTGTGTACCCCCCACTAGCCGGTAATATAGCCCACGCTGGAGCTTCAGTAGACTTAACCATCTTCTCATTACACCTAGCCGGAGCATCTTCCATCCTTGGGGCAATCAATTTTATCACCACCGCAATCAACATAAAAACCCCATCAATATCACAATACCAAACACCCCTATTCGTCTGATCAGTCCTAATTACAGCAGTCCTACTACTTCTATCCCTCCCAGTACTCGCAGCAGGAATCACAATACTTTTAACTGATCGAAACTTAAACACAACCTTCTTTGACCCATCAGGTGGCGGAGACCCAATTTTATACCAACACCTATGGCTGCCAAAAGCACACGTAGAAGCTCCAATCGCAGGGTCAATAATCCTAGCTGGAATCCTACTAAAACTGGGCGGATATGGCATTATTCGAGTATCATTAACTATAAACCCA-CCAATAAAAAACCTGCATTACCCCTTTATAATATTAGCCTTATGAGGAATCATCATAACCAGCCTAATCTGCTTACGACAAACTGATCTAAAGTCATTAATTGCATATTCATCAGTAAGTCATATAGGACTTGTTATCGCCGCAACACTTATTCAAACCCCATGAGCAATTACCGGCGCCACTATCCTTATAATCGCCCACGGCCTATCTTCATCCATACTATTCTGCCTAGCAAACACAAATTATGAACGAACTAACAGTCGAACCCTAATTATCACCCGCAACATACAACTTATGCTTCCACTCATAGCCCTATGATGACTTACTGCCAGCTTAACCAATATAGCCCTACCACCAACCATCAACCTAATAGGAGAATTATCAATTATTACCTCAATATTCAATTGATCAAACATTACCATCGCAATCACAGGCTTAGGTGTCATTCTTTCAGCGACATATACACTATACATATTTTCAACCACACAACTAGGAGGACAACTACCACCAAAC---ATATTAACCATTCCACCAAACAAAACACGAGAACACCTAATTATAACACTCCACACTCTACCAATAATACTTCTAATACTAAAACCACAACTAATCTCAGGAATCTTAT???????????????????????????????????????????????????TAAAAAACACAAACCCCCTATTAAAAATTATTAACAACACATTAATCGATCTCCCAACCCCATCCAATATTTCGTACCTTTGGAACTTTGGATCACTACTAGGAATATGCCTAATTATCCAACTAACTACAGGCCTATTTCTATCAATACATTACTCCCCCGACATCTCCCTAGCATTCTCATCAATCTCCCATATCCATCGAGACGTCCAATATGGATGATTAATCCGAAACACACATGCCAATGGAGCCTCACTATTCTTCATATGCATTTACTTACACATTGGACGAGGAATTTACTATGGCTCCTACCTCTACAAAAAAACCTGAAATACAGGAGTAGCACTTCTCCTACTAGTAATAGCCACTGCATTCGTAGGCTACGTATTACCATGAGGCCAAATATCATTCTGAGGTGCCACAGTAATTACTAATCTCCTATCAGCCATCCCTTATATCGGACCAACCCTCGTACAATGAATCTGAGGTGGATTCTCAGTAGACAACGCCACCCTAACTCGATTTTTCACATTTCACTTCCTAATCCCGTTCATAATTATAGGCATAACAATAGTGCACTTACTGTTTCTTCATGAAACAGGATCAAACAACCCAACAGGTATAAACTCTAACTGCGACAAAATCTCATTCCATCCATACTTCTCCTACAAAGACCTCCTAGGATTTACCCTAATAGCACTGATCCTACTAACCCTATCTTTATTCCACCCATACCTCTTAGGAGACCCAGACAACTTCACACCTGCCAACCCACTAGTAACCCCACCCCACATTAAACCAGAATGGTACTTCCTATTTGCCTATGCTATCCTACGATCAATCCCCAACAAACTAGGAGGAGTTCTAGCACTACTACTATCAATCCTAATCCTACTCCTAATACCCACCCTACACCTATCCAAACAACGAACAGCCGCATTCCGACCCCTTACCCAAACAATATTATGACTACTAGCCACTGACCTACTAATCCTAACATGAATCGGTAGCCAACCAGTAGAAGATCCGTTCATCACAATCGGACAAATCGCATCTTCACTATATTTCACCCTCATTTTAATCATCCTTCCAACGACAAGCCTCGCCGAAAACAA--GATATTAAACCGTAAATAAAAAGAAAGCAGAGGAGGTGGCCTCTTTGGACAAAGGCACTGTGGTGCAGATAGATGGCAGAAAAGTTCCAATGGCAGAAAAGTCACTCTTTGCAGATACAGTCTTAAAGGACAATAAGCAGGCTCTTGAAAAAGATGCTGACAATCTGAAAATGCAAGAGAATGCAGTTCATCAAGCAAACCTGCAACAGCTCTGTCGCATCTGTGGAGTTTCATTTAAAACTGATCGCTACAAGAGAAGTCATCCAGTGCATGGACCAGTGGACAGTGAAACTCAGGGACTTCTGAGAAAGAAAGAGAAAAGAGCAACATCTTGGCCAGATCTTATTGCCAAGATTTTTAAGATTGACGTGCGAGGTGATATTGACACAATCCACCCCACTCGGTTTTGTCACAACTGCTGGAGCATCATCCATAGAAAGTTCAGCAATGCACCATGTGAAGTGTATTTCCCAAGAAACAGCACGATGGAGTGGCAGTCCCATTCCCCGAGCTGCACTGTTTGTTGCACTGCTCATCGTGGGGTCAAGAGAAAGAACCAGCCATCCAACTTACATCTCAACAAAAGGCTCAAGATCATTGCAGAACGTGCCCGAAAAACTAAAAGTGTAAAAAAC---CAAGCACAGGTAAAAAACAAAAACCTTATGAAAAAGATTGCCAACTGCAAAAAGATACATCTTAGCACTAAACTTCTTGCAGTTGACTACCCTGCCGATTTCATTAA-GTCCATCTCTTGCCAAGTCTGTGAGCATATTCTGGCAGATCCAGTGGAAACGACATGTAGACACTTGTTCTGCAGAACCTGCATCCTGAAGTGCCTCAAAGTTATGGGCAGCTATTGCCCCTCCTGCCGATACCCTTGCTTCCCTACCGACTTGGAGAGCCCAGTGAAATTCTTCCTGAACATCCTCAATTCCCTGGCTGTGCGATGCCCAGTGAAAGAATGTGATGAGGAGGTTTTGCTGGGTAAATACTGCCATCATTTGTCCAGCCACAAAGAGTTGAAAGGGAAAGAGATTTACACACACATAAATAAAGGTGGCAGACCAAGGCAACACTTACTGTCATTGACTAGGAGAGCTCAAAAGCATCGTCTGAGAGAACTCAAGCTTCAAGTCAAAGCTTTTGCTGAGAAAGAAGAAGGAGGTGATATAAAGGCTGTGTGCCTAACTTTGTTCTTGTTGGCTCTCAGAGCAAGAAATGAACACAGACAAGCAGATGAATTGGAAGCTATAATGCAAGGGAAGGGATCAGGGCTTCACCCGGCTGTTTGCTTGGCAATCCGAGTCAACACCTTTCTCAGCTGTAGCCAGTACCATAAAATGTACAGAACTGTAAAAGCCATAACTGGGAGGCAGATCTTCCAGCCACTGCATGCTCTCCGCACTGCTGAAAAGGCCCTCCTGCCAGGTTATCATCCATTTGAGTGGAAACCCCCTTTGAAAAATGTGTCCACTAATACAGAAGTGGGAATTATAGATGGTCTTTCAGGGCTGCCACACTCAGTTGATGACTATCCAGTAGACACAATTGCCAAGAGGTTTCGATATGATGCAGCCTTAGTTTCTGCCTTAATGGACATGGAGGAAGACATCTTGGAAGGGATGAAAGCCCAAGACCTGGATGACTACTTGAATGGGCCCTTCACTGTGGTGGTGAAGGAGTCTTGTGATGGGATGGGAGATGTCAGCGAGAAGCATGGAAGTGGACCGGCTGTTCCTGAGAAGGCAGTTCGATTTTCTTTCACACTTATGAGCATCACTATAGCTCATGGCAATGAAAATGTAAGGATCTTTGAAGAAGTCAAGCCTAATTCAGAGCTGTGTTGCAAACCCCTGTGTCTTATGCTAGCTGATGAATCGGACCATGAGATGCTGACAGCCATCCTGAGTCCTGTCATAGCAGAAAGAGAGACCATGAAAAACAGTGTCCTGCTGCTTGAAATGGGAGGCATACTCAGAACATTCAAATTCATCTTTAGAGGTACAGGGTATGATGAGAAACTTGTCCGTGAAGTTGAAGGCCTTGAAGCCTCAGGCTCTACTTACATCTGTACCCTTTGTGATGCGACCCGTCTGGAAGCCTCTCAAAACTTGGTCCTCCACTCCATAACAAGAAGTCATGCTGAAAACCTGGAGCGTTACGAGGTATGGAGGTCCAACCCATATAATGAATCCGTTGATGAGCTACGTGACAGAGTGAAGGGTGTTTCTGCCAAACCTTTTATTGAGACTGTTCCTTCCATAGATGCATTGCATTGTGACATTGGCAATGCGGCTGAGTTCTACAAGATATTCCAGTTTGAGATAGGTGAGGTGTACAAGAACCCTAACTCATCTAAAGAAGAGAGAAAGAGGTGGCAGTCAACTCTTGACAAGCACCTCAGGAAGAAGATGAACCTGAAGCCCATAATGAGGATGAATGGAAACTTTGCTAGAAAGCTTATGAGCAAAGAGACAGTGGAAGCAGTCTGTGAATTAATAATGTGTGAGGAAAGGCATGAAGCCCTAAGAGAACTGATGGATCTTTACCTTAAGATGAAACCAGTGTGGAGGTCTTCATGCCCAGCCAAAGAGTGCCCAGAATTGCTGTGTCAGTATAGCTTCAACTCACAACGTTTTGCTGAGCTCCTGTCCACAAAGTTCAAGTACAGATATGAGGGCAAGATTACAAATTACTTTCACAAAACTCTTGCTCATGTTCCTGAAATCATTGAAAGAGATGGCTCCATTGGGGCCTGGGCGAGTGAAGGGAATGAGTCTGGGAACAAATTGTTCAGGCGTTTC????????????????????????????????????????????????????????????????????????????????????????????????????????????????????????????????????????????????????????????????????????????????????????????????????????????????????????????????????????????????????????????????????????????????????????????????????????????????????????????????????????????????????????????????????????????????????????CTTTGTGTATTTGTAATGATTTATTTAAATACGTTTTAGAGTGTGTGTGATATTAATTGAAACAG--ATGCATGCTAGTTATCCAGCAGTTATGAATAGTATAAATCATATCCATAAAAGTCATTTCAAACAGATCC--GTTTCAGTGTATGTATTTACCTGGCTTTCAGCAAGATTGATATATTCATAAAAATCATTGCATTTTAAAAATGAAAAGCCAGATTCATCATTGTT---CCAGTTTTACATCAGTGTAACTCCACCAAACCCAGCATAGAGTTAGGCTAGTGATAGGGGTGAATCAGATCCAGTGTTTTGTGTTTCAAGCAATCTGGCAGGCATTAGGTTGACTCTACGAGATCTGTGAGTTTTACTAAGGCAGATTTTTTTCCCTTCATCCTCGCAGTTCTGAGTCACGCCCTTTGCCAGTCATCTCTGGGTAAGACACTGAAGCTTGTCTGAGAAGCGAGGAAGAATGTTTATATCTTTGTAATTATTTAAGCATTACTAC---TTTTTGGTGCAATGTATGGAAAGGATAAATATAACAAAGGACGCTTACAAGGGAGTCCTTTGCTGGGCACGTGAACATGTTGGGAATTGTTCAGGGTCATTTTTGTCCTATGGATGTGTCTGGAGTCAGCCTCTCAGCTCCTTTCCATGAAAAATGAGGATTATAATGCATGTGAAGCC----------TGGAACTGTGTGCCCTC-AAACCCCATTGACTTTGGGAGTTGCAGATGCTCAGCATCTC--ACTGGATTTGCTCAATGGTCACCTAAGAATTGTTTAGAATTGGAGCCGCTTCTTTGGCACACTTCATGCATCAATATTTATCATTTCATTTGCAGCATATGGCATTCTGAGAAATACAGAGAGGGGGGA---AAGGGACTATATTGAGGACATTTGTCTTTTAGCATCTGTCAAAGTCACCAAGCTTAACAGGAATCAATGAAAATCTGTGATTTCTATTTTTGTCATATTAAAAGTGTGATGTTTTTGTTTTTCCTGGAAATATATTAAGTGATTGAAGTGATTTAATTTCTTAATGTTTTGTCTCCAGA?????????????????????????
Chelodina_expansa		??????????????????????????????????????????????????????????????????????????????????????????????????????????????????????????????????????????????????????????????????????????????????????????????????????????????????????????????????????????????????????????????????????????????????????????????????????????????????????????????????????????????????????????????????????????????????????????????????????????????????????????????????????????????????????????????????????????????????????????????????????????????????????????????????????????????????????????????????????????????????????????????????????????????????????????????????????????????????????????????????????????????????????????????????????????????????????????????????????????????????????????????????????????????????????????????????????????????????????????????????????????????????????????????????????????????????????????????????????????????????????????????????????????????????????????????????????????????????????????????????????????????????????????????????????????????????????????????????????????????????????????????????????????????????????????????????????????????????????????????????????????????????????????????????????????????????????????????????????????????????????????????????????????????????????????????????????????????????????????????????????????????????????????????????????????????????????????????????????????????????????????????????????????????????????????????????????????????????????????????????????????????????????????????????????????????????????????????????????????????????????????????????????????????????????????????????????????????????????????????????????????????????????????????????????????????????????????????????????TTCTAGCCGGAATTCTACTAAAACTAGGCGGATATGGCATTATTCGAGTGTCATTAACTATAACCCCG-CCAATAAAAAACCTGCACTACCCATTCATAATTTTAGCCCTATGAGGGATCATCATGACCAGCCTAATCTGCTTACGCCAAACTGATCTGAAATCATTAATCGCATACTCATCAGTAAGCCACATAGGACTCGTTATCGCTGCAACACTAATTCAAACCACATGAGCAATCTCCGGCGCCACCATCCTTATAATTGCCCACGGCCTATCATCATCTATATTATTCTGCCTAGCAAACACAAACTATGAACGAACTAACAGCCGAACCCTAATTATTACCCGTAATATACAACTAATACTTCCACTCATAACCCTGTGATGACTCACCGCTAGCCTAACCAACATAGCCCTACCACCGACCATCAACCTAATAGGAGAATTATCCATTATTACCTCAATATTTAACTGATCAAACATTACCATTACAATTACAGGCTTAGGTATTATTCTTTCAGCAACATACACATTATACATATTTTCAACTACACAACTAGGAGGAAGCCTACCACCAAAC---ATACTAACCATCCC??????????????????????????????????????????????????????????????????????????????????????????????????????????????????????????????????????????????????????????????????????????????????????????????????????????????????????????????????????????????????????????????????????????????????????????????????????????????????????????????????????????????????????????????????????????????????????????????????????????????????????????????????????????????????????????????????????????????????????????????????????????????????????????????????????????????????????????????????????????????????????????????????????????????????????????????????????????????????????????????????????????????????????????????????????????????????????????????????????????????????????????????????????????????????????????????????????????????????????????????????????????????????????????????????????????????????????????????????????????????????????????????????????????????????????????????????????????????????????????????????????????????????????????????????????????????????????????????????????????????????????????????????????????????????????????????????????????????????????????????????????????????????????????????????????????????????????????????????????????????????????????????????????????????????????????????????????????????????????????????????????????????????????????????????????????????????????????????????????????????????????????????????????????????????????????????????????????????????????????????????????????????????????????????????????????????????????????????????????????????????????????????????????????????????????????????????????????????????????????????????????????????????????????????????????????????????????????????????????????????????????????????????????????????????????????????????????????????????????????????????????????????????????????????????????????????????????????????????????????????????????????????????????????????????????????????????????????????????????????????????????????????????????????????????????????????????????????????????????????????????????????????????????????????????????????????????????????????????????????????????????????????????????????????????????????????????????????????????????????????????????????????????????????????????????????????????????????????????????????????????????????????????????????????????????????????????????????????????????????????????????????????????????????????????????????????????????????????????????????????????????????????????????????????????????????????????????????????????????????????????????????????????????????????????????????????????????????????????????????????????????????????????????????????????????????????????????????????????????????????????????????????????????????????????????????????????????????????????????????????????????????????????????????????????????????????????????????????????????????????????????????????????????????????????????????????????????????????????????????????????????????????????????????????????????????????????????????????????????????????????????????????????????????????????????????????????????????????????????????????????????????????????????????????????????????????????????????????????????????????????????????????????????????????????????????????????????????????????????????????????????????????????????????????????????????????????????????????????????????????????????????????????????????????????????????????????????????????????????????????????????????????????????????????????????????????????????????????????????????????????????????????????????????????????????????????????????????????????????????????????????????????????????????????????????????????????????????????????????????????????????????????????????????????????????????????????????????????????????????????????????????????????????????????????????????????????????????????????????????????????????????????????????????????????????????????????????????????????????????????????????????????????????????????????????????????????????????????????????????????????????????????????????????????????????????????????????????????????????????????????????????????????????????????????????????????????????????????????????????????????????????????????????????????????????????????????????????????????????????????????????????????????????????????????????????????????????????????????????????????????????????????????????????????????????????????????????????????????????????????????????????????????????????????????????????????????????????????????????????????????????????????????????????????????????????????????????????????????????????????????????????????????????????????????????????????????????????????????????????????????????????????????????????????????????????????????????????????????????????????????????????????????????????????????????????????????????????????????????????????????????????????????????????????????????????????????????????????????????????????????????????????????????????????????????????????????????????????????????????????????????????????????????????????????????????????????????????????????????????????????????????????????????????????????????????????????????????????????????????????????????????????????????????????????????????????????????????????????????????????????????????????????????????????????????????????????????????????????????????????????????????????????????????????????????????????????????????????????????????????????????????????????????????????????????????????????????????????????????????????????????????????????????????????????????????????????????????????????????????????????????????????????????????????????????????????????????????????????????????????????????????????????????????
Chelodina_novaeguineae		??????????????????????????????????????????????????????????????????????????????????????????????????????????????????????????????????????????????????????????????????????????????????????????????????????????????????????????????????????????????????????????????????????????????????????????????????????????????????????????????????????????????????????????????????????????????????????????????????????????????????????????????????????????????????????????????????????????????????????????????????????????????????????????????????????????????????????????????????????????????????????????????????????????????????????????????????????????????????????????????????????????????????????????????????????????????????????????????????????????????????????????????????????????????????????????????????????????????????????????????????????????????????????????????????????????????????????????????????????????????????????????????????????????????????????????????????????????????????????????????????????????????TATACTTAATCTTTGGGGCCTGAGCAGGAATAATTGGAACAGCCCTTAGTCTATTAATCCGAACAGAACTAAGCCAACCAGGCCCCCTAATAGGAAATGACCAAGTATACAACGTTATTGTTACTGCCCATGCTTTTATCATAATCTTCTTTATAGTAATACCAATCATAATCGGGGGTTTCGGAAACTGATTGGTCCCAATAATAATTGGAGCACCAGATATAGCCTTCCCACGAATAAATAACATAAGCTTTTGACTACTACCCCCATCACTTCTCCTTCTACTAGCATCATCAGGAATCGAAGCTGGAGCCGGAACAGGATGAACTGTATATCCCCCACTAGCCGGAAATATAGCTCACGCCGGAGCTTCAGTAGACTTAACCATCTTCTCATTACACCTAGCCGGAGCATCATCCATCCTTGGGGCAATCAACTTTATTACCACCACAATTAACATAAAAACCCCATCAATATCACAATACCAAACACCTTTATTCGTCTGATCAGTCCTAATTACAGCAATCCTACTACTTTTATCTCTTCCAGTACTAGCTGCAGGTATCACAATACTTCTAACCGACCGAAACTTAAACACAACATTCTTTGACCCATCAGGCGGCGGAGACCCAATTCTGTACCAACACCTA???????????????????????????????????????????????????????????????????????????????????????????????????????????????????????????????????????????????????????????????????????????????????????????????????????????????????????????????????????????????????????????????????????????????????????????????????????????????????????????????????????????????????????????????????????????????????????????????????????????????????????????????????????????????????????????????????????????????????????????????????????????????????????????????????????????????????????????????????????????????????????????????????????????????????????????????????????????????????????????????????????????????????????????????????????????????????????????????????????????????????????????????????????????????????????????????????????????????????????????????????????????????????????????????????????????????????????????????????????????????????????????????????????????????????????????????????????????????????????????????????????????????????????????????????????????????????????????????????????????????????????????????????????????????????????????????????????????????????????????????????????????????????????????????????????????????????????????????????????????????????????????????????????????????????????????????????????????????????????????????????????????????????????????????????????????????????????????????????????????????????????????????????????????????????????????????????????????????????????????????????????????????????????????????????????????????????????????????????????????????????????????????????????????????????????????????????????????????????????????????????????????????????????????????????????????????????????????????????????????????????????????????????????????????????????????????????????????????????????????????????????????????????????????????????????????????????????????????????????????????????????????????????????????????????????????????????????????????????????????????????????????????????????????????????????????????????????????????????????????????????????????????????????????????????????????????????????????????????????????????????????????????????????????????????????????????????????????????????????????????????????????????????????????????????????????????????????????????????????????????????????????????????????????????????????????????????????????????????????????????????????????????????????????????????????????????????????????????????????????????????????????????????????????????????????????????????????????????????????????????????????????????????????????????????????????????????????????????????????????????????????????????????????????????????????????????????????????????????????????????????????????????????????????????????????????????????????????????????????????????????????????????????????????????????????????????????????????????????????????????????????????????????????????????????????????????????????????????????????????????????????????????????????????????????????????????????????????????????????????????????????????????????????????????????????????????????????????????????????????????????????????????????????????????????????????????????????????????????????????????????????????????????????????????????????????????????????????????????????????????????????????????????????????????????????????????????????????????????????????????????????????????????????????????????????????????????????????????????????????????????????????????????????????????????????????????????????????????????????????????????????????????????????????????????????????????????????????????????????????????????????????????????????????????????????????????????????????????????????????????????????????????????????????????????????????????????????????????????????????????????????????????????????????????????????????????????????????????????????????????????????????????????????????????????????????????????????????????????????????????????????????????????????????????????????????????????????????????????????????????????????????????????????????????????????????????????????????????????????????????????????????????????????????????????????????????????????????????????????????????????????????????????????????????????????????????????????????????????????????????????????????????????????????????????????????????????????????????????????????????????????????????????????????????????????????????????????????????????????????????????????????????????????????????????????????????????????????????????????????????????????????????????????????????????????????????????????????????????????????????????????????????????????????????????????????????????????????????????????????????????????????????????????????????????????????????????????????????????????????????????????????????????????????????????????????????????????????????????????????????????????????????????????????????????????????????????????????????????????????????????????????????????????????????????????????????????????????????????????????????????????????????????????????????????????????????????????????????????????????????????????????????????????????????????????????????????????????????????????????????????????????????????????????????????????????????????????????????????????????????????????????????????????????????????????????????????????????????????????????????????????????????????????????????????????????????????????????????????????????????????????????????????????????????????????????????????????????????????????????????????????????????????????????????????????????????????????????????????????????????????????????????????????????????????????????????????????????????????????????????????????????????????????????????????????????????????????????????????????????????????????????????????????????????????????????????????????????????????????????????????????????????????????????????????????????????????????????????????????????????????????????????????????????????????????????????????????????????????????????????????????????????????????????????????????????????????????????????????????????????????????????????????????????????????????????????????????????????????????????????????????????????????????????????????????????????????????????????????????????????????????????????????????????????????????????????????????????????????????????????????????????????????????????????
Chelodina_colliei		CCCTAAACAT-AGATTCCACAACCCACATAAGGAATCCGCCAGAGAA-CTACAGNCCANACGTTTANAATTCAAGGGACTGGGGGG-TGTTCCAAA-CCCACCTAGAGGAGCCTGTTCTATAACCGATAATCCACGATTTGCCTCACCATCTCTAGCCC-AC-AGCCTATATACCTCCGNCTCCAGCTTACCCTATGAAGGAAC-AAAAGCAAGCATACCAGTTAT-CACAG--CTAGCAAGTCAGGTCAAGGTGTAGCCAACTGAGATGGAAGAAATGGGCTACATTTTCTATAT--TAGAACTAC--TTCA-C---GGAAAGAGCCTTGAAAA-CATTGCTCT-TAAAGCAGGATTTAGCAGTAATATG-AGAACAGAGAGCTCATATTAACAAGGACCTGATAGC?????????????????????????????????AGGGGTGATGCCTGCCCAGTGACACTGTTTAACGGCCG-CGGTATCCTGACCGTGCGAAGGTAGCATAATCACTCGTCTTTTAAATAAAGACTAGAATGAATGGCTAAACGAG-GCTCTACCTGTCTCTTACAAA-TTATCAGTGAAATTGATATCCTCGTGCAAAAGCGAGAATAATCCCATAAGACGAGAAGACCCTGTGGAACTTTAAGT--ATAAGTCA--ACTACTAAACTACA-ACACCAACTCTACT-GA-AACACCACATAAAA-TTAC-TTGACC--TTACTTTCGGTTGGGGTGACCTTGGAGAACAATAAAACCTCCAAAAA-AATAT-----------ACCAAGAT-TAACAGCCCAAAGTGCC-TAAGGCA--AAACGATCCAATACATTTGATCAACGAACCAAGCTACCCCAGGGATAACAGCGCAATCCCCTCTTAGAGT-CCATATCAACGATGGGGGTTTACGACCTCGATGTTGGATCAGGACATCCTAATGGTGCAGCCGCTATTAAGGGTCCTATACTTAATCTTTGGTGCCTGAGCAGGAATAATCGGAACAGCCCTTAGTCTATTAATCCGAACAGAACTAAGCCAACCAGGCCCCCTAATGGGAGACGACCAAGTATACAATGTCATTGTTACTGCCCATGCTTTCATCATAATCTTCTTCATAGTAATACCCATTATAATCGGAGGCTTCGGAAACTGATTAGTTCCAATAATAATTGGAGCACCAGATATAGCCTTCCCACGAATAAACAACATAAGCTTCTGACTACTACCACCATCACTGCTCCTACTACTAGCATCATCAGGAATCGAAGCTGGGGCCGGAACAGGATGAACTGTGTACCCCCCACTAGCCGGAAATATAGCTCACGCCGGAGCCTCAGTAGACTTAACCATCTTCTCACTACACCTAGCCGGAGCATCATCCATCCTTGGGGCAATCAATTTTATTACCACCGCAATCAACATAAAAACCCCATCAATATCACAATACCAAACACCTTTATTCGTCTGATCAGTCCTAATTACAGCAGTACTACTACTTTTATCTCTCCCAGTACTTGCCGCAGGTATCACAATACTTTTAACCGACCGAAATTTAAACACAACCTTCTTTGACCCATCAGGTGGTGGAGACCCAATTCTATATCAACACCTA????????????????????????????????????????????????????????????????????????????????????????????????????????????????????????????????????????????????????????????????????????????????????????????????????????????????????????????????????????????????????????????????????????????????????????????????????????????????????????????????????????????????????????????????????????????????????????????????????????????????????????????????????????????????????????????????????????????????????????????????????????????????????????????????????????????????????????????????????????????????????????????????????????????????????????????????????????????????????????????????????????????????????????????????????????????????????????????????????????????????????????????????????????????????????????????????????????????????????????????????????????????????????????????????????????????????????????????????????????????????????????????????????????????????????????????????????????????????????????????????????????????????????????????????????????????????????????????????????????????????????????????????????????????????????????????????????????????????????????????????????????????????????????????????????????????????????????????????????????????????????????????????????????????????????????????????????????????????????????????????????????????????????????????????????????????????????????????????????????????????????????????????????????????????????????????????????????????????????????????????????????????????????????????????????????????????????????????????????????????????????????????????????????????????????????????????????????????????????????????????????????????????????????????????????????????????????????????????????????????????????????????????????????????????????????????????????????????????????????????????????????????????????????????????????????????????????????????????????????????????????????????????????????????????????????????????????????????????????????????????????????????????????????????????????????????????????????????????????????????????????????????????????????????????????????????????????????????????????????????????????????????????????????????????????????????????????????????????????????????????????????????????????????????????????????????????????????????????????????????????????????????????????????????????????????????????????????????????????????????????????????????????????????????????????????????????????????????????????????????????????????????????????????????????????????????????????????????????????????????????????????????????????????????????????????????????????????????????????????????????????????????????????????????????????????????????????????????????????????????????????????????????????????????????????????????????????????????????????????????????????????????????????????????????????????????????????????????????????????????????????????????????????????????????????????????????????????????????????????????????????????????????????????????????????????????????????????????????????????????????????????????????????????????????????????????????????????????????????????????????????????????????????????????????????????????????????????????????????????????????????????????????????????????????????????????????????????????????????????????????????????????????????????????????????????????????????????????????????????????????????????????????????????????????????????????????????????????????????????????????????????????????????????????????????????????????????????????????????????????????????????????????????????????????????????????????????????????????????????????????????????????????????????????????????????????????????????????????????????????????????????????????????????????????????????????????????????????????????????????????????????????????????????????????????????????????????????????????????????????????????????????????????????????????????????????????????????????????????????????????????????????????????????????????????????????????????????????????????????????????????????????????????????????????????????????????????????????????????????????????????????????????????????????????????????????????????????????????????????????????????????????????????????????????????????????????????????????????????????????????????????????????????????????????????????????????????????????????????????????????????????????????????????????????????????????????????????????????????????????????????????????????????????????????????????????????????????????????????????????????????????????????????????????????????????????????????????????????????????????????????????????????????????????????????????????????????????????????????????????????????????????????????????????????????????????????????????????????????????????????????????????????????????????????????????????????????????????????????????????????CAAGAACCGGCTAGCATCGCGACAAAGCTTCTGGGCTGAGCTGAATGTGGCCCGGCTACACCATCACAATGTGGTACGTGTTGTAGCTGCTAGCACTTGTGCCCCTGCCAACCAAGAGAGCCTGGGCACCATAATCATGGAATATGCTGGCCGCACTACCCTGCACCATGTCATCTATGGCACTGGCTGCCTGCAGGGAAAGGGAGAGGATGATGGGGGTGGATGTGGCAAGGAACCCTTAAGCATCGCTGAGTCCCTGGGTTATTCCTCTGATATTGTGACTGCCTTAGTCTTCCTCCACTCACAGTGTATTGTGCACCTGGACTTGAAGCCTGCTAATGTATTAATCACCGATCA??????????????????????????????????????????????????????????????????????????????????????????????????????????????????????????????????????????????????????????????????????????????????????????????????????????????????????????????????????????????????????????????????????????????????????????????????????????????????????????????????????????????????????????????????????????????????????????????????????????????????????????????????????????????????????????????????????????????????????????????????????????????????????????????????????????????????????????????????????????????????????????????????????????????????????????????????????????????????????????????????????????????????????????????????????????????????????????????????????????????????????????????????????????????????????????????????????????????????????????????????????????????????????????????????????????????????????????????????????????????????????????????????????????????????????????????????????????????????????????????????????????????????????????????????????????????????????????????????????????????????????????????????????????????????????????????????????????????????????????
Chelodina_longicollis		CCTTAAACCT-AGATTCCATAACCCACATAAGGAATCCGCCAGAGAA-CTACAAACCAAACGTTTAAAACTCAAAGGACTTGGCGG-TGCTTCAAA-CCCACCTAGAGGAGCCTGTTCTATAATCGATAATCCACGATACACCTCACCATCTCTAGCCC-AC-AGCCTATATACCTCCGTCTACAGCTTACCCTGTGAAGGAATTAAAAGTAAGCATAACAGTTAA-CACAG--CTAACAAGTCAGGTCAAGGTGTAGCCAACTGAGATGGAAGAAATGGGCTACATTTTCTATAC--TAGAATTAT--TTTAAC---GGAAAGAGCCTTGAAAA-CACTGCTCT-AAAAGCAGGATTTAGCAGTAATATG-AGAACAGAAAGCCCATATTAACAAGGACCTGA-AGCGCGCACACACCGCCCGTCACCCTCCTCAAAAA?AGGGGTGATGCCTGCCCAGTGACACTGTTCAACGGCCG-CGGTATCCTGACCGTGCGAAGGTAGCATAATCACTCGTCTTTTAAATAAAGACTAGAATGAATGGCTAAACGAG-GCTCTACCTGTCTCTTACAAA-TTATCAGTGAAATTGATATCCTCGTGCAAAAGCGAGAATAAACCCATAAGACGAGAAGACCCTGTGGAACTTTAAGT--ATAAGTCA--ACTACTAAATTACATACACCAACTCTAAT-GA-AACACCACATACAG-TTAC-TTGACC--TTACTTTCGGTTGGGGTGACCTTGGAGAACAATAAAACCTCCAAAAA-CATAT-----------ACCAAGAT-TAACAACCCAAAGTGCCGTAAAGCA--AAACGATCCAATACTCTTGATCAACGAACCAAGCTACCCCAGGGATAACAGCGCAATCCCCTCTTAGAGT-CCATATCAACGATGGGGGTTTACGACCTCGATGTTGGATCAGGACATCCTAATGGTGCAGCCGCTATTAAGGGTTCTATACTTAATCTTTGGGGCCTGAGCAGGAATAATTGGAACAGCCCTTAGTCTATTAATCCGAACAGAACTAAGCCAACCAGGCCCCCTAATAGGAGATGACCAGGTATACAACGTTATTGTTACTGCCCATGCTTTTATCATAATCTTCTTTATAGTAATACCAATCATAATCGGGGGCTTCGGAAACTGATTGGTCCCAATAATAATTGGAGCACCAGATATAGCCTTCCCACGAATAAATAACATAAGCTTTTGACTACTACCCCCATCACTTCTCCTCCTACTAGCATCATCAGGGATTGAAGCTGGGGCCGGAACAGGATGAACTGTATATCCCCCACTAGCCGGAAACATAGCTCACGCCGGAGCTTCAGTAGACTTAACCATCTTCTCATTACACCTAGCCGGAGCATCATCCATCCTTGGGGCAATCAATTTTATTACCACCGCAATTAACATAAAAACCCCATCAATATCACAATACCAAACACCTTTATTCGTCTGATCAGTCCTAATTACAGCAGTCCTACTACTTTTATCTCTTCCAGTACTAGCTGCAGGTATCACAATACTTCTAACCGACCGAAACTTAAACACAACATTCTTTGACCCATCAGGCGGCGGAGACCCAATCCTGTACCAACACCTATGATTACCAAAAGCACACGTAGAGGCTCCAATTGCAGGATCAATAATTCTAGCCGGAATTCTACTAAAACTAGGCGGATATGGCATTATTCGAGTGTCATTAACTATAACCCCG-CCAATAAAAAACCTGCACTACCCATTCATAATTTTAGCCCTATGAGGGATCATCATGACCAGCCTAATCTGCTTACGCCAAACTGATCTGAAATCATTAATCGCATACTCATCAGTAAGCCACATAGGACTCGTTATCGCTGCAACACTAATTCAAACCACATGAGCAATCTCCGGCGCCACCATCCTTATAATTGCCCACGGCCTATCATCATCTATATTATTCTGCCTAGCAAACACAAACTATGAACGAACTAACAGCCGAACCCTAATTATTACCCGTAATATACAACTAATACTTCCACTCATAACCCTGTGATGACTCACCGCTAGCCTAACCAACATAGCCCTACCACCGACCATCAACCTAATAGGAGAATTATCCATTATTACCTCAATATTTAACTGATCAAACATTACCATTACAATTACAGGCTTAGGTATTATTCTTTCAGCAACATACACATTATACATATTTTCAACTACACAACTAGGAGGAAGCCTACCACCAAAC---ATACTAACCATCCCGCCAAGCCAAACACGAGAACACCTAATCATGACATTACACATCTTACCTATAATACTCCTAATGCTAAAACCACAACTAATTTCAGGCATCCTAT???????????????????????????????????????????????????TAAAAAACATAAACCCCTTATTAAAAATTATTAACAACACACTAATCGACCTACCAACCCCATCCAACATTTCGTACCTTTGAAACTTTGGATCACTACTAGGAATATGCCTAATTATCCAATTAGCCACAGGCCTATTTTTATCTATACATTACTCACCCGATATCTCCCTAGCATTCTCATCAATCTCCCACATTCACCGAGATGTTCAATATGGATGACTAATCCGAAACGTACATGCCAACGGGGCCTCACTATTCTTCATATGCATCTACCTACACATTGGACGAGGAATTTATTATGGTTCCTACCTCTACAAAAAAACTTGAAATACAGGAGTAATTCTCCTCCTACTAGTTATAGCCACTGCATTCGTGGGTTATGTACTACCATGAGGACAAATATCATTCTGAGGGGCTACAGTAATTACCAATCTTCTTTCAGCTATCCCATACATCGGACCAACACTCGTACAATGAATCTGAGGTGGATTTTCAGTAGACAACGCCACCCTAACTCGATTCTTCACATTTCACTTCCTAATCCCATTCATAATCATAGGGATGACAATAGTACACCTACTATTTCTACATGAAACAGGATCGAATAACCCAACGGGCATAAACTCCAATTGCGATAAAATCCCATTCCACCCATACTTCTCTTACAAAGACCTCCTAGGATTCTCCCTAATAACATTATTCCTACTAACCCTAGCTTTATTCTACCCATACCTCCTAGGAGACCCAGACAACTTTACACCTGCTAATCCACTAGTAACCCCACCCCACATTAAACCAGAATGATACTTCCTATTCGCCTACGCTATCCTACGATCAATCCCTAATAAACTAGGAGGAGTTCTAGCATTACTACTGTCAATCTTAATCCTACTCCTAATGCCAATCCTACACCTATCAAAACAACGAACAGCTACATTCCGACCAATTACCCAAACAATATTATGACTACTAGCCACCGACCTGCTAATCCTAACATGGATCGGTAGCCAACCAGTAGAAGACCCATTTATTATAATCGGACAAATCGCCTCTTCACTATACTTCACCCTCATCCTAATTATCCTACCAGTAGTAAGTATAAGTGAAAACAA--AATATTAAACCGTAAATAAAAAGAAAGCAGAGGAGGTGGCCTCTTTGGACAAAGGCACTGTGGTGCAGATAGATGC---AGCAGTTCCAATGGCAGAAAAGTCACTTTTTGCAGATACAGTCTTAAAGGACAATAAGCAGGCTCTTGAAAAAGATGCTGACAATCTCAAAATGCAAGACAATGCAGCTCATCAAGCAAACCTGCAACAGCTCTGTCGCATCTGTGGAGTTTCATTTAAAACTGATCGCTACAAGAGAAGTCATCCAGTGCATGGACCAGTGGACAGTGAAACTCAGGGACTTCTGAGAAAGAAAGAGAAAAGAGCAACATCTTGGCCAGATCTTATTGCCAAAGTTTTTAAGATTGACGTGCGAGGTGATATTGACACAATCCACCCCACTCGGTTTTGTCACAACTGCTGGAGCATCATCCATAGAAAGTTCAGCAATGCACCATGTGAAGTGTATTTCCCAAGAAACAGCACGATGGAGTGGCAGTCCCATTCCCCGAGCTGCACTGTTTGTTGCACTGCTCATCGTGGGGTCAAGAGAAAGAACCAGCCATCCAACTTACATCTCAACAAAAGGCTCAAGATCATTGCAGAACGTGCCCGAAAAACTAAAAGTGTAAAAAAC---CAATCACAGGTAAAAAACAAAAACCTTATGAAAAAGATTGCCAACTGCAAAAAGATACATCTTAGCACTAAACTTCTTGCAGTTGACTACCCTGCAGATTTCATTAA-GTCCATCTCTTGCCAAGTCTGTGAGCATATTCTGGCAGATCCAGTGGAAACGACATGTAGACACTTGTTCTGCAGAACCTGCATCCTGAAGTGCCTCAAAGTTATGGGCAGCTATTGCCCCTCCTGCCGATACCCTTGCTTCCCTACCGACTTGGAGAGCCCAGTGAAATCCTTCCTGAACATCCTCAATTCCCTGGCTGTGCGATGCCCAGTGAAAGAATGTGATGAGGAGGTTTTGCTGGGTAAATACTGCCATCATTTGTCCAGCCACAAAGAGCTGAAAGGGAAAGAGATTTACACACACATAAATAAAGGCGGCAGACCAAGGCAACATTTACTGTCATTGACTAGGAGAGCTCAAAAGCATCGTCTGAGAGAACTCAAGCTTCAAGTCAAAGCTTTTGCTGAGAAAGAAGAAGGAGGTGATATAAAGGCTGTGTGCCTAACTTTGTTCTTGTTGGCTCTCAGAGCAAGAAATGAACACAGACAAGCAGATGAGTTGGAAGCTATAATGCAAGGGAAGGGATCAGGGCTTCACCCGGCTGTTTGCTTGGCAATCCGAGTCAACACCTTTCTCAGCTGTAGCCAGTACCATAAAATGTACAGAACTGTAAAAGCCATAACTGGGAGGCAGATCTTCCAGCCACTGCATGCTCTCCGCACTGCTGAAAAGGCCCTCTTGCCAGGTTATCATCCATTTGAGTGGAAACCCCCTTTGAAAAATGTGTCCACTAATACAGAAGTGGGAATTATAGATGGGCTTTCAGGGCTGCCACACTCAGTTGATGACTACCCAGTAGACACAATTGCCAAGAGGTTTCGATATGATGCAGCCTTAGTTTCTACCTTAATGGACATGGAGGAAGACATCTTGGAAGGGATGAAAGCCCAAGACCTGGATGACTACTTGAATGGGCCCTTCACTGTGGTGGTGAAGGAGTCTTGTGATGGGATGGGAGATGTCAGCGAGAAGCATGGAAGTGGACCACCTGTTCCTGAGAAGGCAGTTCGATTTTCTTTCACACTTATGAGCATCACTATAGCTCATGGCAATGAAAATGTAAGGATCTTTGAAGAAGTCAAGCCTAATTCAGAGCTGTGTTGCAAACCCCTGTGTCTTATGCTAGCTGATGAATCGGACCATGAGATGCTGACAGCCATCCTGAGTCCTGTCATAGCAGAAAGAGAGACCATGAAAAACAGTGTCCTGCTGCTTGAAATGGGAGGCATACTCAGAACATTCAAATTCATCTTTAGAGGTACAGGGTATGACGAGAAACTTGTCCGTGAAGTTGAAGGCCTTGAAGCCTCAGGCTCTACTTACATCTGTACCCTTTGTGATGCAACCCGCCTGGAAGCCTCTCAAAACTTGGTCCTCCACTCCATAACAAGAAGTCATGCTGAAAACCTGGAGCGTTACGAGGTATGGAGGTCCAACCCATATAATGAATCCGTTGATGAGCTACGTGACAGAGTGAAGGGTGTTTCTGCCAAACCTTTTATTGAGACTGTTCCTTCCATAGATGCATTGCATTGTGACATTGGCAATGCGGCTGAGTTCTACAAGATATTCCAGTTTGAGATAGGTGAGGTGTACAAGAACCCTAACTCATCTAAAGAAGAGAGAAAGAGGTGGCAGTCAACTCTTGACAAGCACCTCAGGAAGAAGATGAACCTGAAGCCCATAATGAGGATGAATGGAAACTTTGCTAGAAAGCTTATGAGCAAAGAGACAGTGGAAGCAGTCTGTGAATTAATAACGTGTGAGGAAAGGCATGAAGCCCTAAGAGAACTGATGGATCTTTACCTTAAGATGAAACCAGTGTGGAGGTCTTCATGCCCAGCCAAAGAGTGCCCAGAATTGCTGTGTCAGTATAGCTTCAACTCACAACGTTTTGCTGAGCTCCTGTCCACAAAGTTCAAGTACAGATATGAGGGCAAGATTACAAATTACTTTCACAAAACTCTTGCTCATGTTCCTGAAATCATTGAAAGAGATGGCTCCATTGGGGCCTGGGCAAGTGAAGGGAATGAGTCTGGGAACAAATTGTTTAGGCGTTTC??????????????????????????????????????????????????????????????????????????????????????????????????????????????????????????????????????????????????????????????????????????????????????????????????????????????????????????????????????????????????????????????????????????????????????????????????????????????????????????????????????????????????????????????????????????????????????????????????????????????????????????????????????????????AATTGAAACAG--ACGCATGCTAGTTATCCAGCAGTTATGAATAGCATAAATCATATCCATAAAAGTCATTTCAAACAGATCT--GTTTCAGTGTATGTATTTACCTGGCTTTCAGCAAGATTGATATATTCATAAAAATCATTGCATTTTAAAAATGAAAAGCCAGATTCATCATTGTT---CCAGTTTTACATCTGTGTAACTCCACCGAACCCAGCATAGAGTTAGGCTAGTGATAGGGGTGAATCAGATCCAGTGTTTTGTGTTTCAAGCAATCTGGCAGGCATTAGGTTGACTCTACGAGATCTGTGAGTTTTACTAAGGCAGATTTTTTTCCCTTCATCCTTGCAGTTCTGAGTCACGCCCTTTGCCAGTCATCTCTGGGTAAGACACTGAAGCTTGTCTGAGAAGCGAGGAAGAATGTTTATATCTTTGTAATTATTGAAGCATTACTAC---TTTTTGGTGCAATGTATGGAAAGGATAAATATAACAAAGGACGCTTACAAGGGAGTCCTTTGCTGGGCACGTGAACATGTTGGGAATTGTTCAGGGTCATTTTTGTCCTATGGATGTGTCTGGAGTCAGCCTCTCAGCTCCTTTCCATGAAAAATGAGGATTATAATGCATGTGAAGCCCAGTCCTGCCTGGAACTGTGTGCCCTC-AAACCCCATTGACTTTGGGAGTTGCAGATGCTCAGCATCTC--ACTGGATTTGCTCAATGGTAACCTAAGAATTGTTTAGAATTGGAGCCGCTTCTTTGGCACACTTCATGCATCAATATTTATCATTTCATTTGCAGCATATGGCATTCTGAGAAATACAGAGAGGGGGGA---A-GGGACTATAT-GAGGACATTTGTCTTCTAGCATCTGTCAAAGTCACCAAGCTTAACAGGAATCAATGAAA-TCTGTGATTTCTATTTTTGTCATATTAAAAGTGTGATGTTTTTGTTTTTCCTGGAAATATA??????????????????????????????????????????????????????????????????????
Chelodina_pritchardi		??????????????????????????????????????????????????????????????????????????????????????????????????????????????????????????????????????????????????????????????????????????????????????????????????????????????????????????????????????????????????????????????????????????????????????????????????????????????????????????????????????????????????????????????????????????????????????????????????????????????????????????????????????????????????????????????????????????????????????????????????????????????????????????????????????????????????????????????????????????????????????????????????????????????????????????????????????????????????????????????????????????????????????????????????????????????????????????????????????????????????????????????????????????????????????????????????????????????????????????????????????????????????????????????????????????????????????????????????????????????????????????????????????????????????????????????????????????????????????????????????????????????TATACTTAATCTTTGGAGCCTGAGCAGGAATAATTGGAACAGCCCTTAGTCTATTAATCCGAACAGAACTAAGCCAACCAGGCCCCCTAATAGGAGACGACCAAGTATACAACGTTATCGTTACTGCCCATGCTTTTATCATAATCTTCTTTATAGTAATACCAATCATAATCGGGGGATTCGGAAACTGATTGGTCCCAATAATAATTGGAGCGCCAGATATAGCCTTTCCACGAATAAATAACATAAGCTTTTGACTACTACCACCATCACTTCTCCTTCTACTAGCATCATCAGGAATCGAAGCTGGGGCCGGAACAGGATGAACGGTATACCCCCCACTAGCCGGAAACATAGCTCACGCCGGAGCTTCAGTAGACTTAACCATCTTCTCATTACACCTAGCCGGAGCATCATCCATCCTTGGGGCAATCAATTTTATTACCACCGCAATTAACATAAAAACCCCATCAATGTCACAATACCAAACACCTTTATTCGTCTGATCAGTCCTAATTACAGCAGTCCTACTACTTTTATCTCTTCCAGTACTAGCTGCAGGTATCACAATACTTCTAACCGACCGAAACTTAAACACAACATTCTTTGATCCATCAGGCGGCGGAGACCCAATTCTGTACCAACACCTA???????????????????????????????????????????????????????????????????????????????????????????????????????????????????????????????????????????????????????????????????????????????????????????????????????????????????????????????????????????????????????????????????????????????????????????????????????????????????????????????????????????????????????????????????????????????????????????????????????????????????????????????????????????????????????????????????????????????????????????????????????????????????????????????????????????????????????????????????????????????????????????????????????????????????????????????????????????????????????????????????????????????????????????????????????????????????????????????????????????????????????????????????????????????????????????????????????????????????????????????????????????????????????????????????????????????????????????????????????????????????????????????????????????????????????????????????????????????????????????????????????????????????????????????????????????????????????????????????????????????????????????????????????????????????????????????????????????????????????????????????????????????????????????????????????????????????????????????????????????????????????????????????????????????????????????????????????????????????????????????????????????????????????????????????????????????????????????????????????????????????????????????????????????????????????????????????????????????????????????????????????????????????????????????????????????????????????????????????????????????????????????????????????????????????????????????????????????????????????????????????????????????????????????????????????????????????????????????????????????????????????????????????????????????????????????????????????????????????????????????????????????????????????????????????????????????????????????????????????????????????????????????????????????????????????????????????????????????????????????????????????????????????????????????????????????????????????????????????????????????????????????????????????????????????????????????????????????????????????????????????????????????????????????????????????????????????????????????????????????????????????????????????????????????????????????????????????????????????????????????????????????????????????????????????????????????????????????????????????????????????????????????????????????????????????????????????????????????????????????????????????????????????????????????????????????????????????????????????????????????????????????????????????????????????????????????????????????????????????????????????????????????????????????????????????????????????????????????????????????????????????????????????????????????????????????????????????????????????????????????????????????????????????????????????????????????????????????????????????????????????????????????????????????????????????????????????????????????????????????????????????????????????????????????????????????????????????????????????????????????????????????????????????????????????????????????????????????????????????????????????????????????????????????????????????????????????????????????????????????????????????????????????????????????????????????????????????????????????????????????????????????????????????????????????????????????????????????????????????????????????????????????????????????????????????????????????????????????????????????????????????????????????????????????????????????????????????????????????????????????????????????????????????????????????????????????????????????????????????????????????????????????????????????????????????????????????????????????????????????????????????????????????????????????????????????????????????????????????????????????????????????????????????????????????????????????????????????????????????????????????????????????????????????????????????????????????????????????????????????????????????????????????????????????????????????????????????????????????????????????????????????????????????????????????????????????????????????????????????????????????????????????????????????????????????????????????????????????????????????????????????????????????????????????????????????????????????????????????????????????????????????????????????????????????????????????????????????????????????????????????????????????????????????????????????????????????????????????????????????????????????????????????????????????????????????????????????????????????????????????????????????????????????????????????????????????????????????????????????????????????????????????????????????????????????????????????????????????????????????????????????????????????????????????????????????????????????????????????????????????????????????????????????????????????????????????????????????????????????????????????????????????????????????????????????????????????????????????????????????????????????????????????????????????????????????????????????????????????????????????????????????????????????????????????????????????????????????????????????????????????????????????????????????????????????????????????????????????????????????????????????????????????????????????????????????????????????????????????????????????????????????????????????????????????????????????????????????????????????????????????????????????????????????????????????????????????????????????????????????????????????????????????????????????????????????????????????????????????????????????????????????????????????????????????????????????????????????????????????????????????????????????????????????????????????????????????????????????????????????????????????????????????????????????????????????????????????????????????????????????????????????????????????????????????????????????????????????????????????????????????????????????????????????????????????????????????????????????????????????????????????????????????????????????????????????????????????????????????????????????????????????????????????????????????????????????????????????????????????????????????????????????????????????????????????????????????????????????????????????????????????????????????????????????????????????????????????????????????????????????????????????????????????????????????????????????????????????????????????????????????????????????????????????????
Elseya_albagula			????????????????????????????????????????????????????????????????????????????????????????????????????????????????????????????????????????????????????????????????????????????????????????????????????????????????????????????????????????????????????????????????????????????????????????????????????????????????????????????????????????????????????????????????????????????????????????????????????????????????????????????????????????????????????????????????????????????????ACTGTTTAACGGCCG-CGGTATCCTGACCGTGCGAAGGTAGCGTAATCACTCGTCTTTTAAATAAAGACTAGAATGAATGGCTAAACGAG-GTTCTATCTGTCTCTTACAAA-CAATCAGTGAAATTGATCTCCCCGTGCAAAAGCGAGAATATCCCCATAAGACGAGAAGACCCTGTGGAACTTTAAGT--ATAGGTCACAATCATCAACCAACTT------ATTCAACAGAA-AACACC--CTACAATACAC-CTGACTTAAAACTTTCGGTTGGGGCGACCTCGGAGAACAATAAAACCTCCGAAA--ATTAC----------TACCAAGATAACACAAACCAAAGTGTC-TACGACA--AAACGATCCAATGTACATGATCAACGAACCAAGCTACCCCAGGGATAACAGCGCAATCCCCTCCTAGAGT-CCATATCAATGACGGGGGTTTACGACCTCGATGTTGGATCAGGACAT?????????????????????????????TTTATCTAATTTTTGGGGCCTGAGCAGGAATAATTGGGACAGCTCTTAGCCTATTAATTCGAACAGAATTAAGCCAACCAGGACCCCTACTAGGAGACGATCAGGTGTACAATGTAATTGTTACAGCCCACGCCTTCATCATAATCTTTTTCATAGTCATACCAATTATAATCGGTGGATTTGGAAACTGATTAGTTCCAATAATGATCGGATCGCCAGACATAGCATTTCCACGTATAAATAACATAAGCTTCTGACTTCTACCTCCATCACTACTACTACTTTTAGCCTCCTCCGGCATTGAAGCCGGAGCTGGAACGGGATGAACTGTTTATCCCCCTTTAGCAGGCAATATAGCCCACGCTGGAGCTTCTGTCGACCTAACCATCTTCTCCCTACACTTAGCCGGGGCATCTTCAATTTTAGGGGCTATCAACTTCATCACCACTGCAATCAATATAAAAACCCCATCAATATCACAATACCAAACACCACTTTTCGTATGATCCGTACTTATCACAGCTGTATTACTACTACTCTCTCTTCCAGTACTAGCCGCAGGAATTACAATACTTTTAACAGACCGAAACCTAAATACAACCTTCTTTGATCCATCTGGCGGAGGAGACCCAATTCTATACCAACACCTA?????????????????????????????????????????????????????????????TACTAAAACTAGGTGGATACGGCATTATCCGAGTATCCTTAATTATAGACCCA-CCTCTAAAAAATCCATATTATCCATTCATGATGTTAGCACTATGAGGAATCATCATAACTAGCCTGATCTGCCTTCGACAAACCGACCTAAAATCACTAATCGCCTATTCATCTGTAAGCCACATAGGACTTGTTATCGCCTCTACATTCGTACAAACCCAATGAGCACTCACAGGGGCTATCACCCTTATAATTGCTCACGGTTTAACATCATCTATGCTATTCTGCCTATCAAACACAAACTACGAACGAACAAACAGCCGAATTTTAATCCTAACACGTAACATGCAACTTCTACTCCCACTCATAGCCTTGTGATGACTTTCTGCCTGCCTTACTAATATGGCCCTACCCCCAACCATCAACCTCATAGGAGAACTATCCATTATTACCTCACTATTCAACTGGTCAAATACTACCATCTTAGTCACAGGACTAGGCACCATCCTAACAGCTACATATACACTCTATATATTCTCAACTACCCAACTAGGAGGTGAATCACCACCAAAC---ATCTTAACCATTCCACCAACCCAAACACGAGAACACCTAATCATAACACTACATACCCTACCCATGATACTACTAATAATAAAACCACAACTAATCTCAGGTGTATTATGTTAATATAGTTTTAACACAAACATTAGACTGTGGATCTAAAAATAGGAG???????????????????????????????????????????????????????????????????????????????????????????????????????????????????????????????????????????????????????????????????????????????????????????????????????????????????????????????????????????????????????????????????????????????????????????????????????????????????????????????????????????????????????????????????????????????????????????????????????????????????????????????????????????????????????????????????????????????????????????????????????????????????????????????????????????????????????????????????????????????????????????????????????????????????????????????????????????????????????????????????????????????????????????????????????????????????????????????????????????????????????????????????????????????????????????????????????????????????????????????????????????????????????????????????????????????????????????????????????????????????????????????????????????????????????????????????????????????????????????????????????????????????????????????????????????????????????????????????????????????????????????????????????????????????????????????????????????????????????????????????????????????????????????????????????????????????????????????????????????????????????????????????????????????????????????????????????????????????????????????????????????????????????????????????????????????????????????????????????????????????????????????????????????????????????????????????????????????????????????????????????????????????????????????????????????????????????????????????????????????????????????????????????????????????????????????????????????????????????????????????????????????????????????????????????????????????????????????????????????????????????????????????????????????????????????????????????????????????????????????????????????????????????????????????????????????????????????????????????????????????????????????????????????????????????????????????????????????????????????????????????????????????????????????????????????????????????????????????????????????????????????????????????????????????????????????????????????????????????????????????????????????????????????????????????????????????????????????????????????????????????????????????????????????????????????????????????????????????????????????????????????????????????????????????????????????????????????????????????????????????????????????????????????????????????????????????????????????????????????????????????????????????????????????????????????????????????????????????????????????????????????????????????????????????????????????????????????????????????????????????????????????????????????????????????????????????????????????????????????????????????????????????????????????????????????????????????????????????????????????????????????????????????????????????????????????????????????????????????????????????????????????????????????????????????????????????????????????????????????????????????????????????????????????????????????????????????????????????????????????????????????????????????????????????????????????????????????????????????????????????????????????????????????????????????????????????????????????????????????????????????????????????????????????????????????????????????????????????????????????????????????????????????????????????????????????????????????????????????????????????????????????????????????????????????????????????????????????????????????????????????????????????????????????????????????????????????????????????????????????????????????????????????????????????????????????????????????????????????????????????????????????????????????????????????????????????????????????????????????????????????????????????????????????????????????????????????????????????????????????????????????????????????????????????????????????????????????????????????????????????????????????????????????????????????????????????????????????????????????????????????????????????????????????????????????????????????????????????????????????????????????????????????????????????????????????????????????????????????????????????????????????????????????????????????????????????????????????????????????????????????????????????????????????????????????????????????????????????????????????????????????????????????????????????????????????????????????????????????????????????????????????????????????????????????????????????AGTCATACTTCTTTGCATATTTGTAATGCTTTATTTAAATAGGGAG-AGAGTGTGTGTGATATTAATTGAAACAGAGATGCACGCTAGTTATCCAGCAGTTATGAACAGCATAAATCATATCCATGAAAGTCATTTCAAACAGATCTATGTTTCAGTGTATGTATTTATCTGGCTTTCAGCAGGATTGATATATTCATAAAAATCATTGCATTTTAAAAATGAAAAGCCAGATTCATCATTGTTGTTCCAGTTTTACATCAGTGTAACTCCACTGAACCCAGCATAGAGTTAGGCTAGTGATAGGGGTGAACCAGATCCAATGTTTTGTGTTTCAAGCAATCTGGTAGGCATTAGGTTGACTCTATGAGATCTGTGGGTTTTACTAAGGCAGATTTTTTTCC-TTCATCCTCACAGTTCTGAGTCACACCCTTTGCCAGTCATCTTTGGGTAAAAAACTGAAGCTTGACTGAGAAGTGAGGAAGAATGTTTATATCTTTGTC????????????????????????????????????????????????????????????????????????????????????????????????????????????????????????????????????????????????????????????????????????????????????????????????????????????????????????????????????????????????????????????????????????????????????????????????????????????????????????????????????????????????????????????????????????????????????????????????????????????????????????????????????????????????????????????????????????????????????????????????????????????????????????????????????????????????????????????????????????????????????????????????????????????????????????????????
Elseya_dentata			CCCTAAACCT-AANTTTTTT--AATATA-AAA-AATTGGCCAGAGTACTTACAAACCAAATGTTTGAAACTCAAGGGACTTGGCGG-TGCCTCAAA-CCCACCTAGAGGAGCCTGTTCTATAATCGATAATCCACGANCTACCTCACCACCTCTCGCCC-AC-AGCCTATATACCTCCGTCCACAGCTTACCCTACTAAGGAAC-AAAAGTAAGCACAATAGTTTA-CACAA--CTAATAAGTCAGGTCAAGGNGTAGCCAACTGGGGTGGNAGAAATGGCCTACATTTTCTACAC--TAGAAATA---TTAA-C---GGAAAGAACCCTGAAA--TATGGACTT-AAAAGTAGGATTTAGCAGTAATGTG-AAAGCAGAGAGCCCACATTAACCAGGATCTGA-GAC?????????????????????????????????AGGAGTGATGCCTGCCCAGTGACACTGTTTAACGGCCG-CGGTATCCTGACCGTGCGAAGGTAGCGTAATCACTCGTCTTTTAAATAAAGACTAGAATGAATGGCTAAACGAA-GTTCTATCTGTCTCTTACAAA-CAATCAGTGAAATTGATCTCCCCGTGCAAAAGCGGGAATAACCCCATAAGACGAGAAGACCCTGTGGAACTTTAAGT--ATAGGTCACAATCATCAACCAACT-------ATTCAACAGAA-AACACC--CTGTAAAACAC-CTGACTTAAAACTTTCGGTTGGGGCGACCTCGGAGGATAATAAAACCCCCGAAA--ATTAC----------TACCAAGATAGCACAAATCTAAGTGTC-TACGACA--AAACGATCCAATATACATGATCAACGAACCAAGCTACCCCAGGGATAACAGCGCAATCCCCTCTTAGAGT-CCATATCAATGACGGGGGTTTACGACCTCGATGTTGGATCAGGACACCCTAATGGTGCAACCGCTATTAAGGGTC?TTTATCTAATTTTTGGGGCCTGAGCAGGAATAATCGGAACAGCCCTTAGTCTATTAATTCGAACAGAATTAAGTCAACCAGGACCCCTACTAGGAGACGATCAAGTGTACAATGTAATTGTTACAGCCCACGCCTTCATCATAATCTTTTTTATAGTCATACCAATTATAATCGGTGGATTTGGAAACTGATTAGTCCCAATAATAATTGGATCGCCAGACATAGCATTTCCACGTATAAATAACATAAGCTTCTGACTTCTACCTCCATCACTACTACTACTCCTAGCCTCCTCCGGCATTGAAGCCGGGGCTGGAACAGGATGAACTGTTTACCCCCCTTTAGCAGGCAACATAGCCCACGCTGGGGCTTCTGTAGACCTAACCATCTTCTCCCTACACTTAGCCGGGGCATCTTCAATTTTAGGGGCTATCAACTTCATCACCACTGCAATCAATATAAAAACCCCATCAATATCACAATACCAAACACCACTTTTCGTATGATCCGTACTTATCACAGCTGTATTACTACTACTTTCTCTTCCAGTACTAGCTGCAGGCATTACAATACTCTTAACAGACCGAAACCTAAATACAACCTTCTTTGATCCATCTGGTGGAGGAGACCCAATTCTGTACCAACACCTG??????????????????????????????ATCGCCGGATCAATAATCCTTGCTGGTGTACTACTAAAACTAGGTGGATACGGCATTATCCGAGTATCTTCAATTTTAGACCCA-CCCCTAAAAAATCCATATCATCCATTCATGATGCTAGCACTATGAGGAATCATCATAACTAGCCTGATCTGCCTGCGACAGACCGACCTAAAGTCACTAATCGCCTATTCATCCGTAAGCCACATAGGACTTGTTATCGCCTCTACACTTGTGCAAACCCAATGAGCACTAACAGGGGCTATCACCCTTATAATTGCCCACGGTTTAACATCATCCATACTATTCTGCCTATCAAATACAAACTACGAACGAACAAACAGCCGAATTTTAATCCTAACACGCAACATACAAATTCTACTCCCACTAATAGCCATATGATGACTTTCTGCCTGCCTTACTAACATGGCCCTACCACCAACTATCAACCTCATAGGAGAACTATCCATTATTACCTCACTATTCAACTGATCCAATACTACTATCTTAGTCACAGGACTAGGCACCATCCTAACAGCTACATATACGCTCTATATATTCTCAACTACTCAACTAGGGGGTGAATCACCATCAAAC---ATCTTAACCATTCCACCAACCCAAACACGAGAACACCTAATCATAACACTACACATCCTACCCATAATATTACTAATAATAAAACCACAACTAATCTCAAATGTATTATGTTAATATAGTTTTAATACAAACATTAGACTGTGGATCTAAAAATAGGAG?TAAAAAACACAAATCCACTACTAAAAATTATCAACAACACCTTAATCAACCTACCCACCCCCCCCAATATTTCATCTTTATGAAATTTCGGATCATTACTAGGAGCATGCCTCATTCTACAACTAACCACAGGAATCTTCCTAGCCATACACTACTCACCCGACATCTCCACAGCATTCTCATCAATCTCACACATTCAACGGGACGTCCAATACGGATGACTAATCCGAAATATACACGCCAACGGCGCCTCACTATTCTTTATGTGTATCTACCTTCACATTGGACGGGGAATCTACTACGGCTCCTATCTCTACAACAAAACTTGAAACACAGGGGTAATATTACTGTTCCTAGTCATAGCCACTGCATTCGTAGGCTACGTATTACCATGGGGACAGATATCATTCTGAGGAGCCACAGTAATCACCAACCTTTTATCAGCCATTCCATACGTAGGCCCCGCACTTGTAGAGTGAATCTGAGGGGGATTCTCTGTAGACAACGCCACCCTAACCCGATTCTTCACATTCCATTTTCTAATCCCATTCGCCATCCTAGGAATAACCATACTACACCTCCTATTACTACACGAAACAGGATCAAATAACCCAACAGGACTAAACTCAAACTGTGACAAAATTCCATTCCACCCCTACTTCTCCTATAAAGACCTACTAGGTCTCATTCTAATAATTACATGCCTGCTCACTCTGGTCCTATTCTACCCAAACCTACTAGGAGACCCAGACAACTTCACACCAGCGAACCCACTAACCACC????????????????????????????????????????????????????????????????????????????????????????????????????????????????????????????????????????????????????????????????????????????????????????????????????????????????????????????????????????????????????????????????????????????????????????????????????????????????????????????????????????????????????????????????????????????????????????????????????????????????????????????????????????????????????????????????????????????????????????????????????????????????????????????????????????????????????????????????????????????????????????????????????????????????????????????????????????????????????????????????????????????????????????????????????????????????????????????????????????????????????????????????????????????????????????????????????????????????????????????????????????????????????????????????????????????????????????????????????????????????????????????????????????????????????????????????????????????????????????????????????????????????????????????????????????????????????????????????????????????????????????????????????????????????????????????????????????????????????????????????????????????????????????????????????????????????????????????????????????????????????????????????????????????????????????????????????????????????????????????????????????????????????????????????????????????????????????????????????????????????????????????????????????????????????????????????????????????????????????????????????????????????????????????????????????????????????????????????????????????????????????????????????????????????????????????????????????????????????????????????????????????????????????????????????????????????????????????????????????????????????????????????????????????????????????????????????????????????????????????????????????????????????????????????????????????????????????????????????????????????????????????????????????????????????????????????????????????????????????????????????????????????????????????????????????????????????????????????????????????????????????????????????????????????????????????????????????????????????????????????????????????????????????????????????????????????????????????????????????????????????????????????????????????????????????????????????????????????????????????????????????????????????????????????????????????????????????????????????????????????????????????????????????????????????????????????????????????????????????????????????????????????????????????????????????????????????????????????????????????????????????????????????????????????????????????????????????????????????????????????????????????????????????????????????????????????????????????????????????????????????????????????????????????????????????????????????????????????????????????????????????????????????????????????????????????????????????????????????????????????????????????????????????????????????????????????????????????????????????????????????????????????????????????????????????????????????????????????????????????????????????????????????????????????????????????????????????????????????????????????????????????????????????????????????????????????????????????????????????????????????????????????????????????????????????????????????????????????????????????????????????????????????????????????????????????????????????????????????????????????????????????????????????????????????????????????????????????????????????????????????????????????????????????????????????????????????????????????????????????????????????????????????????????????????????????????????????????????????AGTCATACTTCTTTGCATATTTGTAATGTTTTATTTAAATAGGGTG-AGAATGTGTGTGATATTAATTGAAACAGAGATGCACGCTAGTTATCCAGCAGTTATGAACAGCATAAATCATATCCATGAAAGTCATTTCAAACAGATCTATGTTTCAGTGTATGTATTTATCTGGCTTTCAGCAGGATTGATATATTCATAAAAATCATTGCATTTTAAAAATGAAAAGCCAGATTCATCATTGTTGTTCCAGTTTTACATCAGTGTAACTCCACTGAACCCAGCATAGAGTTAGGCTAGTGATAGGGGTGAACCAGATCCAATGTTTTGTGTTTCAAGCAATCTGGTAGGCATTAGGTTGACTCTATGAGATCTGTGGGTTTTACTAAGGCAGATTTTTTTCC-TTCATCCTCACAGTTCTGAGACACACCCTTTACCAGTCATCTTTGGGTAAGAAACTGAAGCTTGACTGAGAAGTGAAGAAGAATGTTTATATCTTTGTC????????????????????????????????????????????????????????????????????????????????????????????????????????????????????????????????????????????????????????????????????????????????????????????????????????????????????????????????????????????????????????????????????????????????????????????????????????????????????????????????????????????????????????????????????????????????????????????????????????????????????????????????????????????????????????????????????????????????????????????????????????????????????????????????????????????????????????????????????????????????????????????????????????????????????????????????
Myuchelys_latisternum		CCCTAAACCT-AAATTTTGT--AANATACAGN-AATTTGCCAGAGAA-CTACAAACCAAACGTTTANAACTCAAGGGACTTGGCGG-TGTCCCAAA-CCCACCTAGAGGAGCCTGTTCTATAATCGATAATCNACGATTCACCTCACCACCTCTCGCCC-AC-AGCCTATATACCTCCGTCCACAGCTTACCCTACCACGGAGA-AAAAGTAAGCACAATAGTCTA-CACAA--CTAACAAGTCAGGTCAAGGTGTATCCAACTGAGGTGGAAGAAATGGGCTACATTTTCTACAC--TAGAAATA---TTCA-C---GGAAAGAGCTCTGAAA--TATAGACCT-AAAAGCAGGATTTAGCAGTAATGTG-AAAGCAGAGAGCCCACATTAACTCGGATCTGG-GAC?????????????????????????????????AGGAGTGATGCCTGCCCAGTGACACTGTYCAACGGCCG-CGGTATCCTGACCGTGCGAAGGTAGCGTAATAACTCGTCTTTTAAATAAAGACTAGAATGAATGGCTAAACGAG-GTTCTATCTGTCTCTTACAAA-TAATCAGTGAAATTGATCCCCCCGTGCAAAAGCGAGAATAATCCCATAAGACGAGAAGACCCTGTGGAACTTTAAGT--ATAAGTCATCACCATTAACCAACC-------CCTCAACAGAATAATACTACTCATAACCCTC-CTGACTTTCAACTTTCGGTTGGGGCGACCTCGGAGAAAAATAAAACCTCCGAAA--ATTAC----------TACTAAGATAGTACAAACCTAAGTGCC-TACGGCA--AAACGATCCAATATACTTGATCAACGAACCAAGCTACCCCAGGGATAACAGCGCAATCCCCTCTTAGAGT-CCATATCAATGACGGGGGTTTACGACCTCGATGTTGGATCAGGACACCCTAATGGTGCAGCCGCTATTAAGGGTTC?????????????????????????????ATAATCGGAACAGCTCTTAGTCTATTAATTCGAACAGAACTAAGCCAACCAGGACCCCTACTAGGAGATGACCAAGTATACAATGTAATTGTTACAGCCCACGCCTTCATTATAATCTTTTTCATAGTTATACCCATTATAATTGGTGGATTTGGAAACTGATTAGTTCCAATAATAATTGGATCGCCAGATATAGCATTTCCACGAATGAATAACATAAGCTTTTGACTTCTACCACCATCACTACTACTACTTTTAGCCTCCTCCGGTATCGAAGCAGGAGCTGGAACAGGGTGAACTGTATATCCCCCCTTGGCTGGAAATATAGCCCACGCTGGAGCTTCTGTCGACCTAACTATCTTCTCCCTACACTTAGCCGGAGCATCCTCAATTTTAGGGGCCATCAACTTCATCACTACCGCAATTAATATAAAAACCCCATCAATATCACAATACCAAACACCACTTTTCGTATGATCAGTACTTATTACAGCTGTATTACTTCTACTCTCCCTTCCAGTACTTGCCGCAGGCATTACAATACTTTTAACAGACCGAAACCTAAATACAACCTTCTTTGACCCATCTGGTGGTGGAGACCCAATCCTATACCAACATCTA??????????????????????????????????????????????????????????????????????????????????????????????????????????????????????????????????????????????????????????????????????????????????????????????????????????????????????????????????????????????????????????????????????????????????????????????????????????????????????????????????????????????????????????????????????????????????????????????????????????????????????????????????????????????????????????????????????????????????????????????????????????????????????????????????????????????????????????????????????????????????????????????????????????????????????????????????????????????????????????????????????????????????????????????????????????????????????????????????????????????????????????????????????????????????????????????????????????????????????????????????????????????????????????????????????????????????????????????????????????????????????????????????????????????????????????????????????????????????????????????????????????????????????????????????????????????????????????????????????????????????????????????????????????????????????????????????????????????????????????????????????????????????????????????????????????????????????????????????????????????????????????????????????????????????????????????????????????????????????????????????????????????????????????????????????????????????????????????????????????????????????????????????????????????????????????????????????????????????????????????????????????????????????????????????????????????????????????????????????????????????????????????????????????????????????????????????????????????????????????????????????????????????????????????????????????????????????????????????????????????????????????????????????????????????????????????????????????????????????????????????????????????????????????????????????????????????????????????????????????????????????????????????????????????????????????????????????????????????????????????GCAAATAAAAAGAAAGCAGAGGAGGTGGCCTCTTTGGACAAAGGCACTGTGGTGCAGATGGATGC---GGCAGTTCCAATTGCAGAAAAGCCACTTCTGGCAGATACAGCCTTAAAGGACAATAAGCAGGCTCTTGAAAAAGATGCTGACAACTTGAAAATGCAAGAGAATGCAACTCATCAAGCAAACCTGCAGCAGCTCTGTCGCATCTGTGGAGTTTCATTTAAAACTGATCGCTACAAGAGAAGTCATCCAGTGCATGGACCAGTGGACAGTGAAACTCAGGGACTTCTGAGAAAGAAAGAGAAAAGAGCAACATCGTGGCCAGATCTTATTGCCAAGGTTTTTAAGATTGACGTGCGAGGTGATATTGACACAATCCACCCCACTCGGTTTTGTCACAATTGCTGGAGCATCATCCATAGAAAGTTCAGCAACGCACCATGTGAAGTGTATTTCCCGAGGAACAGCACCATGGAGTGGCAGTCCCATTCCCCGAGCTGCACTGTTTGTTGCACTGCTCATCGTGGGGTCAAGAGAAAGAACCAGCCATCCAACTTACAGCTCAGCAAAAGGCTCAAGATCATTGCAGAACGTGCCCGAAAAACTAACAGTGTAAAAAAA---CAAGCACAGGTAAAAAACAAAAACCTTATGAAAAAGATTGCCAACTGCAAAAAGATACATCTTAGCACTAAACTTCTTGCAGTTGACTACCCTGCAGATTTCATTAA-GTCCATCTCTTGCCAAGTCTGTGAGCATATTCTGGCAGATCCAGTGGAAACGACATGTAGCCACTTGTTCTGCAGAACCTGCATCCTGAAGTGCCTCAAAGTTATGGGCAGCTATTGCCCCTCCTGCCGATACCCTTGCTTCCCTACCGACTTGGAGAGCCCAGTGAAATCCTTCCTGAACATCCTCAATTCCCTGGCTGTGCGATGCCCAGTGAAAGAATGTGATGAGGAGGTTTTGCTGGGTAAATACTGCCATCATTTGTCCAGCCACAAAGAGCTGAAAGGGAAAGAGATTTACACACACATAAATAAAGGCGGCAGACCAAGGCAACACTTACTGTCATTGACTAGGAGAGCTCAAAAGCATCGTCTGAGAGAACTCAAGCTTCAAGTCAAAGCTTTTGCTGAGAAAGAAGAAGGAGGTGATATAAAGGCTGTGTGCCTAACTTTGTTCTTGCTGGCTCTCAGAGCAAGAAATGAACACAGACAAGCAGATGAGTTGGAAGCTATAATGCAAGGGAAGGGATCAGGGCTTCACCCGGCTGTTTGCTTGGCAATCCGAGTCAACACCTTTCTCAGTTGTAGCCAGTACCATAAAATGTACAGAACTGTAAAAGCCATAACTGGGAGGCAGATCTTTCAGCCACTGCATGCTCTCCGCACTGCTGAAAAGGCCCTCCTTCCAGGTTATCATCCATTTGAGTGGAAACCCCCTTTGAAAAATGTGTCCACTAATACAGAAGTGGGAATTATAGATGGGCTGTCAGGGCTGCCACATTCAGTTGATGACTACCCAGTAGACACAATTTCCAAGAGGTTTCGATATGATGCAGCCTTAGTTTCTGCCTTAATGGACATGGAGGAAGACATCTTGGAAGGGATGAAAGCCCAAGACCTAGATGACTACTTGAATGGTCCCTTCACTGTGGTGGTGAAGGAGTCTTGTGATGGGATGGGAGATGTCAGCGAGAAGCATGGAAGTGGACCGGCTGTTCCTGAGAAGGCAGTTCGATTTTCTTTCACACTCATGAGCATCACTATAGCTCATGGCAATGAAAATGTAAGGATCTTTGAAGAAGCCAAGCCTAATTCAGAGCTGTGTTGCAAACCCCTGTGTCTTATGCTGGCTGATGAATCGGACCATGAGACGCTGACAGCCATTCTGAGCCCTCTCATAGCAGAAAGACAGACAATGAAAAATAGCAACCTGCTTCTTGAAATGGGAGGCATACTCAGAACATTCAAATTCATCTTTAGAGGTACAGGGTATGACGAGAAACTTGTCCGTGAAGTGGAAGGCCTTGAAGCCTCAGGCTCTACTTACATCTGCACCCTCTGTGATGCAACCCGCCTGGAAGCCTCTCAGAACTTGGTCCTCCACTCCATAACAAGAAGTCATGCTGAAAACCTGGAGCGGTATGAGGTATGGAGGTCCAACCCATATCATGAATCTGTCGATGAGCTACGTGACAGAGTGAAGGGTGTTTCTGCCAAACCTTTTATTGAGACAGTTCCTTCCATAGATGCATTGCATTGTGACATCGGCAATGCAGCTGAGTTCTACAAGATATTCCAGTTTGAGATAGGTGAGGTGTACAAGAATCCTAACACATCTAAAGAAGAGAGGAAGAGGTGGCAGTCGACTCTTGACAAGCACCTCAGGAAGAAGATGAACCTGAAGCCCATAATGAGGATGAATGGAAACTTTGCTAGAAAGCTTATGACCAAAGAGACAGTGGAAGCAGTCTGTGAATTAATAACGGGTGAGGAAAGGCATGAAGCCCTAAGAGAACTGATGGATCTTTACCTTAAGATGAAACCAGTGTGGAGGTCTTCATGCCCAGCCAAAGAGTGCCCAGAATTGCTGTGTCAGTATAGCTTCAACTCACAACGTTTTGCTGAGCTCCTGTCCACAAAGTTCAAGTATAGATATGAGGGCAAGATTACAAATTACTTTCACAAAACTCTTGCTCATGTTCCTGAAATCATTGAAAGAGATGGCTCCATTGGGGCCTGGGCAAGTGAAGGGAACGAGTCTGGGAACAAATTGTTTAGGCGTTTC??????????????????????????????????????????????????????????????????????????????????????????????????????????????????????????????????????????????????????????????????????????????????????????????????????????????????????????????????????????????????????????????????????????????????????????????????????????????????????????????????????????????????????????????????????????????????????????????????????????????????????????????????????????????AATTGAAACAGAGATGCATGCTAGTTATCCAGCAGTTATGAACAGCATAAATCATATCCATAAAAATCATTTCAAACAGATCTATGTTTCAGTGTATGTATTTATCTGGCTTTCAGCAGGATTGATATATTCATAAAATTCATTGCATTTTAAAAATGAAAAGCCAGATTCATCATTGTTGTTCCAGTTTTACATCAGTGTAACTCCACTGAACCCAGCATAGAGTTAGGCTAGTGATAGGGGTGAACCAGATCCAATGTTTTGTGTTTCAAGCAATCTGGTAGGCATTAGGTTGACTCTATGAGATCTGTGGGTTTTACTAAGGCAGATTTTTTTCC-TTCATCCTCACAGTTCTGAGTCACGCCCTTTGCCAGTCATCTCTGGGTAAGAAACTGAAGCTTGACTGAGAAGTGAGGAAGAATGTTTATATCTTTGTAATTATTGAAGCATTGCTAC---ATTTTGGTGCAATGTATGGAAAGGATAAATATAACAAAGGACACTTACAAGTGAGTCCTTTGCTGGGCACGTGAACAGGTTGGGAATTGTCCAAGGTCATTTTTGTCCTATGGATGTGTCTGGAGTCAGCCTCTCAGCTCCTTTCCATGAAGAATGAGAATTATAATGCATGTGACGTCCAGTCCCGCCTGGAACTGAGTGCCCTC-AAACCCCATTGACTTTRGGAGTTGTAGATGCTCAGCATCTC--ACCGGATTGGCTCAATGGTCCCCTAAGAATTGTTTAGAGTCGGAGCTGCTTCTTTGGCAGACCTCATGCATCAATATTTAGCATTTCATTCGCAGCATAAGGCATTCTGAGAAATACAGAGAGAGGGGGG-AAAGGGACTTTAG-GAGGACATTTGTCTTCTAGCATCTGTCAAAGTCACAAAGCTTAACAGGAATCAATGAAAATCTGTGACTTCTATTTTTGTCATATTAAAAGTGTGATGTTTTTGTTATTCCTGGAAATATG??????????????????????????????????????????????????????????????????????
Myuchelys_bellii		???????????????????????????????????????????????????????????????????????????????????????????????????????????????????????????????????????????????????????????????????????????????????????????????????????????????????????????????????????????????????????????????????????????????????????????????????????????????????????????????????????????????????????????????????????????????????????????????????????????????????????????????????????????????????????????????????????????????????????????????????????????????????????????????????????????????????????????????????????????????????????????????????????????????????????????????????????????????????????????????????????????????????????????????????????????????????????????????????????????????????????????????????????????????????????????????????????????????????????????????????????????????????????????????????????????????????????????????????????????????????????????????????????????????????????????????????????????????????????????????????????????????????????????????????????????ATAATCGGAACAGCTCTTAGTTTATTAATTCGAACAGAACTAAGCCAACCAGGACCCCTACTAGGAGATGACCAAGTATACAATGTAATTGTTACAGCCCACGCCTTCATTATAATCTTTTTCATAGTTATACCCATTATAATTGGTGGATTTGGAAACTGATTAGTTCCAATAATAATTGGATCGCCAGATATAGCATTTCCACGAATGAATAATATAAGCTTCTGACTTCTACCACCATCACTACTACTACTTCTAGCCTCCTCCGGTATCGAAGCAGGAGCTGGAACAGGGTGAACTGTATATCCCCCCTTGGCTGGAAATATAGCCCACGCTGGAGCTTCTGTCGACCTAACTATCTTCTCCCTACACTTAGCCGGAGCATCCTCAATTTTAGGGGCCATCAACTTCATCACTACCGCAATTAATATAAAAACCCCATCAATATCACAATACCAAACACCACTTTTCGTATGATCAGTACTTATTACAGCTGTATTACTACTACTATCCCTTCCAGTACTTGCCGCAGGCATTACAATACTTTTAACAGACCGAAACCTAAATACAACCTTCTTTGACCCATCTGGTGGTGGAGACCCAATCCTATACCAACATCTA??????????????????????????????ATCGCCGGATCAATAATCCTTGCCGGCGTCCTATTAAAACTAGGAGGATATGGCATCATTCGAGTATCACTCATTATGAGTCCC-CCTCTAAAAAACCCATATTACCCATTCATAATACTAGCACTATGAGGAATCATCATAACTAGCTTAATCTGCCTACGACAAACCGACCTAAAATCACTAATTGCCTATTCATCTGTAAGCCATATAGGATTTGTTATCGCCTCTACATTTGTACAATCTCAATGAGCACTTACAGGGGCCATCACCCTAATAATTGCCCACGGTTTAACATCATCCATGCTATTCTGTCTATCAAACACAAACTACGAACGAACAAACAGCCGAATTTTAATTCTAACACGCAACATACAACTTCTACTCCCACTAATAACCCTATGATGACTTTCTGCCAGCCTTACTAACATAGCCCTACCACCAACCATTAACCTCATAGGAGAACTATCTATTATTGCTTCACTATTCAACTGATCAAATACTACCATCCTAATCACAGGACTGGGCACGATCCTATCAGCTACATATACACTCTACATGTTCTCAACCACTCAACTAGGAGGAGAATCACCATCAAAC---ATCATAACCGTCCCACCAACCCAAACACGAGAACACCTAATCATAGCACTACACATCCTACCAATAATTTTACTAATAATAAAACCACAACTGATCTCAGGTATATTATGTTAATATAGTTTTAATACAAACATTAGACTGTGGATCTAAAAATAGGAG???????????????????????????????????????????????????????????????????????????????????????????????????????????????????????????????????????????????????????????????????????????????????????????????????????????????????????????????????????????????????????????????????????????????????????????????????????????????????????????????????????????????????????????????????????????????????????????????????????????????????????????????????????????????????????????????????????????????????????????????????????????????????????????????????????????????????????????????????????????????????????????????????????????????????????????????????????????????????????????????????????????????????????????????????????????????????????????????????????????????????????????????????????????????????????????????????????????????????????????????????????????????????????????????????????????????????????????????????????????????????????????????????????????????????????????????????????????????????????????????????????????????????????????????????????????????????????????????????????????????????????????????????????????????????????????????????????????????????????????????????????????????????????????????????????????????????????????????????????????????????????????????????????????????????????????????????????????????????????????????????????????????????????????????????????????????????????????????????????????????????????????????????????????????????????????????????????????????????????????????????????????????????????????????????????????????????????????????????????????????????????????????????????????????????????????????????????????????????????????????????????????????????????????????????????????????????????????????????????????????????????????????????????????????????????????????????????????????????????????????????????????????????????????????????????????????????????????????????????????????????????????????????????????????????????????????????????????????????????????????????????????????????????????????????????????????????????????????????????????????????????????????????????????????????????????????????????????????????????????????????????????????????????????????????????????????????????????????????????????????????????????????????????????????????????????????????????????????????????????????????????????????????????????????????????????????????????????????????????????????????????????????????????????????????????????????????????????????????????????????????????????????????????????????????????????????????????????????????????????????????????????????????????????????????????????????????????????????????????????????????????????????????????????????????????????????????????????????????????????????????????????????????????????????????????????????????????????????????????????????????????????????????????????????????????????????????????????????????????????????????????????????????????????????????????????????????????????????????????????????????????????????????????????????????????????????????????????????????????????????????????????????????????????????????????????????????????????????????????????????????????????????????????????????????????????????????????????????????????????????????????????????????????????????????????????????????????????????????????????????????????????????????????????????????????????????????????????????????????????????????????????????????????????????????????????????????????????????????????????????????????????????????????????????????????????????????????????????????????????????????????????????????????????????????????????????????????????????????????????????????????????????????????????????????????????????????????????????????????????????????????????????????????????????????????????????????????????????????????????????????????????????????????????????????????????????????????????????????????????????????????????????????????????????????????????????????????????????????????????????????????????????????????????????????????????????????????????????????????????????????????????????????????????????????????????????????????????????????????????????????????????????????????????????????????????????????????????????????????????????????????????????????????????????????????????????????????????????????????????????????????????????????????????????????????????????????????????????????????????????????????????????????????????????????????????????????AGTCATACTTCTTTGCATATTTGTAATCCTTTATTTAAATAGGGAG-AGAGTGTGTGTGATATTAATTGAAACAGAGATGCATGCTAGTTATCCAGCAGTTATGAACAGCATAAATCATATCCATAAAAATCATTTCAAACAGATCTATGTTTCAGTGTATGTATTTATCTGGCTTTCAGCAGGATTGATATATTCATAAAATTCATTGCATTTTAAAAATGAAAAGCCAGATTCATCATTGTTGTTCCAGTTTTACATCAGTGTAACTCCACTGAACCCAGCATAGAGTTAGGCTAGTGATAGGGGTGAACCAGATCCAATGTTTTGTGTTTCAAGCAATCTGGTAGGCATTAGGTTGACTCTATGAGATCTGTGGGTTTTACTAAGGCAGATTTTTTTCC-TTCATCCTCACAGTTCTGAGTCACGCCCTTTGCCAGTCATCTCTGGGTAAGAAACTGAAGCTTGACTGAGAAGTGAGGAAGAATGTTTATATCTTTGTAATTATTGAAGCATTGCTAC---ATTTTGGTGCAATGTATGGAAAGGATAAATATAACAAAGGACACTTACAAGTGAGTCCTTTGCTGGGCACGTGAACATGTTGGGAATTGTCCAAGGTCATTTTTGTCCTATGGATGTGTCTGGAGTCAGCCTCTCAGCTCCTTTCCATGAAGAATGAGAATTATAATGCATGTGAAGTCCAGTCCCGCCTGGAACTGAGTGCCCTC-AAACCCCATTGACTTTGGGAGTTGCAGATGCTCAGCATCTC--ACCGGATTGGCTCAATGGTCACCTAAGAATTGTTTAGAGTCGGAGCTGCTTCTTTGGCAGACCTCATGCATCAATATTTAGCATTTCATTTGCAGCATAAGGCATTCTGAGAAATACAGAGAGAGGGGG--AAAGGGACTTTAG-GAGGACATTTGTCTTCTAGCATCTGTCAAAGTCACAAAGCTTAACAGGAATCAATGAAAATCTGTGACTTCTATTTTTGTCATATTAAAAGTGTGATGTTTTTGTTATTCCTGGAAATATGTTATGTGACTGAAGTGATTTAATTTCTTAATGTTCTGTCTTTCAGATACAGATGGCTATCCAGCACATAG
Emydura_macquarii		CCCTAATCCT-AAATTTTTT--AAGATACAAA-ATTTGGCCAGAGAA-CTACAAACCAAATGTTGGAAACTCAAGGGACTTGGCGG-TGCCCCAAA-CCCACCTAGAGGAGCCTGTTCTNTAATCGATAATCCACGATNCACCTCACCACCTCTCGCCC-AC-AGCCTATATACCTCCGNCCACAGCTTACCCTACTAAGGAAN-AAAAGTAAGCACAACAGTCTN-CACAA--CTAACAAGTCAGGTCAAGGTGTAGCCAACTGAGGTGGAAGAAATGGGCTACATTTTCTACAC--TAGAAATA---TTCA-C---GGAAAGAGCCCTGAAA--TATGGACCT-AAAAGTAGGATTTAGCAGTAATGTG-AAAGCAGAGAGCCCACATTAACTCGGATCTGG-GAC?????????????????????????????????AGGAGTGATGCCTGCCCAGTGACACTGTTTAACGGTCG-CGGTATCCTGACCGTGCGAAGGTAGCGTAATCACTCGTCTTTTAAATAAAGACTAGAATGAATGGCTAAACGAG-GTTCTATCTGTCTCTTACAAA-CAATCAGTGAAATTGATCCCCCCGTGCAAAAGCGAGGATAACCCCATAAGACGAGAAGACCCTGTGGAACTTTAAGT--ATGAGTCATCACCATTAACCAACT-------ACTCAACAGAA-AACACTACTA-CAACCTTA-CTGACTTCTAACTTTCGGTTGGGGCGACCTCGGAGAAAAACAAAACCTCCGAAA--ATTAC----------TACTACGATAATACAAACCTAAGTGCC-TACGGCA--AAACGATCCAATACACTTGATCAACGAACCAAGCTACCCCAGGGATAACAGCGCAATCCCCTCTTAGAGT-CCATATCAATGATGGGGGTTTACGACCTCGATGTTGGATCAGGACATCCTAATGGTGCAGCCGCTATTAAGGGTTCTTTACTTGATTTTTGGGGCCTGAGCAGGAATAATCGGAACAGCTCTTAGTCTATTAATTCGAACAGAACTAAGCCAACCAGGACCCTTACTGGGAGATGATCAAGTGTACAATGTAATTGTTACAGCCCACGCCTTCATCATAATCTTTTTCATAGTCATACCTATTATAATTGGTGGATTTGGAAACTGATTAGTTCCAATAATAATCGGATCACCAGATATAGCATTTCCACGAATGAATAATATAAGCTTTTGACTTCTACCACCATCACTACTTCTACTTTTAGCCTCCTCTGGTATCGAAGCCGGAGCAGGAACAGGATGAACTGTATATCCCCCCTTAGCTGGAAACATAGCCCACGCTGGAGCCTCTGTTGACCTAACTATCTTCTCCCTACACTTAGCCGGGGCATCCTCAATTTTAGGGGCTATCAACTTTATTACTACCGCAATTAATATAAAAACTCCATCAATATCACAATACCAAACACCACTTTTCGTATGATCAGTACTTATCACAGCTGTATTACTACTACTCTCCCTTCCAGTACTTGCCGCAGGCATTACAATACTTTTAACAGACCGAAACCTAAATACAACCTTCTTTGATCCATCTGGTGGAGGAGACCCAATCCTATATCAACATCTA??????????????????????????????????????????????????????????????????AAACTAGGCGGATACGGCATTATCCGAGTATCACTTATTATAAGCCCC-CCTATAAAAAACCCATACTACCCATTCATAATACTAGCACTATGAGGAATCATCATAACTAGCTTAATCTGCCTACGTCAAACCGACCTAAAATCACTAATCGCCTATTCATCTGTAAGCCATATAGGACTTGTTATCGCCTCTACATTCGTACAGTCCCAATGAGCACTTACAGGCGCCGTCACCCTAATAATTGCCCACGGTTTAACATCATCTATGCTATTCTGCCTATCAAACACAAACTACGAACGAACGAACAGCCGAATTTTAATCCTAACACGAAACATACAGCTTCTACTCCCACTAATAACCCTGTGATGACTTTCTGCCAGCCTAACTAATATAGCCCTACCACCAACCATTAACCTCATGGGGGAATTATCTATTATTGCTTCATTATTCAACTGATCAAATACTACCATCCTAGTCACAGGACTAGGCACAATCCTATCAGCTACATACACACTCTATATGTTCTCAACTACTCAACTAGGAGGTGAATCACCATCAAAC---ATCATAACCATCCCACCAACCCAAACACGAGAACACCTAATCATGGCGCTACACATCCTACCCATAATCCTACTCATAATAAAACCACAACTAATCTCAGGAATATTATGTTAATATAGTTTTAATACAAACATTAGACTGTGGATCTAAAAATAGGAG?TAAAAAACACAAATCCACTATTAAAAATCATTAATAACACCTTTGTTGATCTTCCCACCCCATCCAATATCTCCGCCTTATGAAACTTCGGATCATTACTAGGGGCATGCCTCATTCTACAACTAGCCACAGGAATTTTCTTAGCCATACACTACTCATCCGACATTTCTACAGCATTCTCATCAATTTCCCACATCCAACGAGATGTTCAATATGGATGACTTATTCGAAATATACACGCCAACGGTGCTTCATTATTCTTTATATGCATCTACCTTCATATTGGACGAGGAATCTATTACGGTTCCTACCTTTACAATAAAACCTGAAACACTGGAGTAATATTACTACTACTAGTCATAGCCACTGCATTCGTAGGCTACGTACTACCATGAGGCCAAATATCATTCTGAGGGGCTACAGTAATCACCAACCTATTATCAGCCATCCCATACGTAGGCCCAACACTTGTAGAGTGAATTTGAGGAGGGTTCTCCGTAGACAACGCCACCCTTACTCGATTCTTCACATTTCACTTTCTAATCCCATTCGCCATCCTAGGAATAACCCTACTACACCTCCTACTTCTACACGAAACAGGATCAAATAACCCAACAGGACTAAACTCAAACTGTGACAAAATCCCATTCCACCCATATTTCTCGTATAAAGACCTACTAGGACTCATCCTAATAATCATATGTCTACTTACCCTCACCCTATTTTACCCAAACCTACTAGGAGATCCAGACAACTTTACACCAGCCAATCCACTAACCACT????????????????????????????????????????????????????????????????????????????????????????????????????????????????????????????????????????????????????????????????????????????????????????????????????????????????????????????????????????????????????????????????????????????????????????????????????????????????????????????????????????????????????????????????????????????????????????????????????????????????????????????????????????????????????????????????????????????????????????????????????????????????????????????????????????????????????????????????????????????????????????????????????????????????????????????????????????????????????????????????????????????????????????????????????????????????????????????????????????????????????????????????????????????????????????????????????????????????????????????????????????????????????????????????????????????????????????????????????????????????????????????????????????????????????????????????????????????????????????????????????????????????????????????????????????????????????????????????????????????????????????????????????????????????????????????????????????????????????????????????????????????????????????????????????????????????????????????????????????????????????????????????????????????????????????????????????????????????????????????????????????????????????????????????????????????????????????????????????????????????????????????????????????????????????????????????????????????????????????????????????????????????????????????????????????????????????????????????????????????????????????????????????????????????????????????????????????????????????????????????????????????????????????????????????????????????????????????????????????????????????????????????????????????????????????????????????????????????????????????????????????????????????????????????????????????????????????????????????????????????????????????????????????????????????????????????????????????????????????????????????????????????????????????????????????????????????????????????????????????????????????????????????????????????????????????????????????????????????????????????????????????????????????????????????????????????????????????????????????????????????????????????????????????????????????????????????????????????????????????????????????????????????????????????????????????????????????????????????????????????????????????????????????????????????????????????????????????????????????????????????????????????????????????????????????????????????????????????????????????????????????????????????????????????????????????????????????????????????????????????????????????????????????????????????????????????????????????????????????????????????????????????????????????????????????????????????????????????????????????????????????????????????????????????????????????????????????????????????????????????????????????????????????????????????????????????????????????????????????????????????????????????????????????????????????????????????????????????????????????????????????????????????????????????????????????????????????????????????????????????????????????????????????????????????????????????????????????????????????????????????????????????????????????????????????????????????????????????????????????????????????????????????????????????????????????????????????????????????????????????????????????????????????????????????????????????????????????????????????????????????????????????????????????????????????????????????????????????????????????????????????????????????????????????????????????????????????????????????AGTCATACTTCTTTGCATATTTGTAATGCTTTATTTAAATAGGGAG-AGAGTGTGTGTGATATTAATTGAAACAGAGATGCACGCTAGTTATCCAGCAGTTATGAACAGCATAAATCATATCCATAAAAGTCATTTCAAACAGATCTATGTTTCAGTGTATGTATTTATCTGTCTTTCAGCAGGATTGATATATTCATAAAAATCATTGCATTTTAAAAATGAAAAGCCAGATTCATCATTGTTGTTCCAGTTTTACATCAGTGTAACTCCACTGAACCCAGCATAGAGTTAGGCTAGTGATAGGGGTGAACCAGATCCAATGTTTTGTGTTTCAAGCAATCTGGTAGGCATTAGGTTGACTCT--GAGATCTGTGGGTTTTACTAAGGCAGATTTTTTTCC-TTCATCCTCATAGTTCTGAGTCACGCCCTTTGCCAGTCATCTCTGGGTAAGAAACTGAAGCTTGATTGAGAAGTGAGGAAGAATGTTTATATCTTTGTAATTATTGAAGCATTGCTAC---ATTTTGGTGCAATGTATGGAAAGGATAAATATAACAAAGGACACGTACAAGTGAGTCCTTTGCTGGGCATGTGAACATGTTGGGAATTGTCCAAGGTCATTTTTGTCCTATGGATGTGTCTGGAGTCAGCCTCTCAGCTCCTTTCCATGAAGAATGAGAATTATAATACATGTGAAGTCCAGTCCTGCCTGGAACTGAGTGGCCTC-AAACCCCATTGACTTTGGGAGTTGCAGATGCTCAGCATCTC--ACCGGATTGGCTCAATGGTCACCTAAGAATTGTTTAGAATTGGAGCTGCTTCTTTGGCAGACCTCATGCATCCATATTTATCATTTCATTTGCAGCATAAGGCATTCTGAGAAATACAGAGAGAGTGGG--AAAGGGACTATAT-GAGGACATTTGTCTTCTAGCATCTGTCAAAGTCATAAAGCTTAACAGGAATCAATGAAAATCTGTGACTTCTATTTCTGTCATATTAAAAGTGTGATGTTTTTGTTATTCCTGGAAATATATTATGTGACTGAAGTGATTTAATTTCTTAATGTTCTGTCTTTCAGATACAGATGGCTATCCAGCACATAG
Elusor_macrurus			CCCTAATCCT-AGATTTTTT--AAAACACAAA-AATCTGCCAGAGAA-CTACAAACCAAAAGTTTGAAACTCAAAGGACTTGGCGG-TGCCCCAAA-CCCACCTAGAGGAGCCTGTTCTATAATCGATAATCCACGATTTACCTCGCCACCTCTCGCCC-AC-AGCCTATATACCTCCGTCCACAGCTTACCCTACTAGGGGAC-AAAAGTAAGCATAATAGTTTA-TACAA--CTAACAAGTCAGGTCAAGGTGTAGCCAACTGAGATGGAAGAAATGGGCTACATTTTCTACCC--CAGAAATA---TTCA-C---GGAAAGAGCCCTGAAA--TATGGACCTTAAAAGTAGGATTTAGCAGTAATGTG-AGAGCAGAGAGCCCACATTAACTCGGATCTGG-AGC?????????????????????????????????AGGAGTGATGCCTGCCCAGTGACACTGTTTAMCGGCCG-CGGTATCCTGACCGTGCGAAGGTAGCGTAATCACTCGTCTTTTAAATAAAGACTAGAATGAATGGCTAAACGAG-GCTCTATCTGTCTCTTACAAA-TAATCAGTGAAATTGATCTCYTCGTGCAAAAGCGAGAATMACACCACAAGACGAGAAGACCCTGTGGAACTTTAAGT--GTAAGTCATAATYACTAACTAACT-------ACTCAACAGAATAACACTACTTACAACCTAT-CTGACCAAAAACTTTCGGTTGGGGCGACCTCGGAGRACAATAAAACCTCCGAAAAAATCAC----------TACTAAGATAACACAAACCTAAGTGCC-TACGGCA--AAWCGATCCA-TATACATGATCAACGAACCAAGCTACCCCAGGGATAACAGCGCAATCCCCTCTTAGAGT-CCATATCAATGACGGGGGTTTACGACCTCGATGTTGGATCAGGACATCCTAATGGTGCAWCCGCTAATAAGGGTTCTCTACCTGATCTTCGGGGCCTGAGCAGGAATAATCGGAACGGCTCTTAGTTTATTAATTCGAACAGAACTAAGTCAACCCGGACCACTACTGGGAGATGATCAAGTATACAATGTCATCGTTACAGCCCATGCCTTCATTATAATCTTCTTTATAGTCATACCCATTATAATCGGTGGATTTGGAAACTGATTAGTCCCAATAATAATTGGGTCACCAGACATAGCATTTCCACGCATAAACAATATAAGCTTTTGACTACTACCACCATCACTACTACTACTTCTAGCCTCTTCTGGTGTTGAAGCTGGAGCTGGAACTGGATGAACCGTATATCCCCCCTTAGCCGGCAACATAGCCCATGCTGGAGCTTCTGTTGACCTAACTATCTTCTCCTTACACTTAGCTGGGGCATCCTCAATTCTAGGGGCTATCAACTTCATCACCACCGCAATTAATATAAAAACCCCATCAATATCACAATACCAAACACCACTCTTTGTGTGATCAGTGCTCATCACAGCTGTACTACTACTACTTTCCCTTCCAGTACTCGCCGCAGGCATTACAATACTCTTAACTGACCGAAACCTAAATACAACCTTCTTTGACCCATCTGGTGGGGGAGATCCAATCCTATACCAACACCTA????????????????????????????????????????????????????????????????????????????????????????????????????????????????????????????????????????????????????????????????????????????????????????????????????????????????????????????????????????????????????????????????????????????????????????????????????????????????????????????????????????????????????????????????????????????????????????????????????????????????????????????????????????????????????????????????????????????????????????????????????????????????????????????????????????????????????????????????????????????????????????????????????????????????????????????????????????????????????????????????????????????????????????????????????????????????????????????????????????????????????????????????????????????????????????????????????????????????????????????????????????????????????????????????????????????????????????????????????????????????????????????????????????????????????????????????????????????????????????????????????????????????????????????????????????????????????????????????????????????????????????????????????????????????????????????????????????????????????????????????????????????????????????????????????????????????????????????????????????????????????????????????????????????????????????????????????????????????????????????????????????????????????????????????????????????????????????????????????????????????????????????????????????????????????????????????????????????????????????????????????????????????????????????????????????????????????????????????????????????????????????????????????????????????????????????????????????????????????????????????????????????????????????????????????????????????????????????????????????????????????????????????????????????????????????????????????????????????????????????????????????????????????????????????????????????????????????????????????????????????????????????????????????????????????????????????????????????????????????????????????????????????????????????????????????????????????????????????????????????????????????????????????????????????????????????????????????????????????????????????????????????????????????????????????????????????????????????????????????????????????????????????????????????????????????????????????????????????????????????????????????????????????????????????????????????????????????????????????????????????????????????????????????????????????????????????????????????????????????????????????????????????????????????????????????????????????????????????????????????????????????????????????????????????????????????????????????????????????????????????????????????????????????????????????????????????????????????????????????????????????????????????????????????????????????????????????????????????????????????????????????????????????????????????????????????????????????????????????????????????????????????????????????????????????????????????????????????????????????????????????????????????????????????????????????????????????????????????????????????????????????????????????????????????????????????????????????????????????????????????????????????????????????????????????????????????????????????????????????????????????????????????????????????????????????????????????????????????????????????????????????????????????????????????????????????????????????????????????????????????????????????????????????????????????????????????????????????????????????????????????????????????????????????????????????????????????????????????????????????????????????????????????????????????????????????????????????????????????????????????????????????????????????????????????????????????????????????????????????????????????????????????????????????????????????????????????????????????????????????????????????????????????????????????????????????????????????????????????????????????????????????????????????????????????????????????????????????????????????????????????????????????????????????????????????????????????????????????????????????????????????????????????????????????????????????????????????????????????????????????????????????????????????????????????????????????????????????????????????????????????????????????????????????????????????????????????????????????????????????????????????????????????????????????????????????????????????????????????????????????????????????????????????????????????????????????????????????????????????????????????????????????????????????????????????????????????????????????????????????????????????????????????????????????????????????????????????????????????????????????????????????????????????????????????????????????????????????????????????????????????????????????????????????????????????????????????????????????????????????????????????????????????????????????????????????????????????????????????????????????CAAGAACCGGCTGGCATCGCGGCAAAGCTTCTGGGCTGAGCTGAATGTGGCCCGGCTACACCATCACAATGTGGTACGTGTTGTAGCTGCCAGCACTTGTGCCCCTGCCAACCAAGAGAGCCTGGGCACCATAATCATGGAATATGCTGGCCACACTACCCTGCACCATGTCATCTATGGCACTGGCTGCCTGCAGGGAAAGGGAGAGGATGACGGGGGTGGATGTGGCAAGGAACCCTTAAGCATCACTGAGTCCCTGGGTTATTCCTCTGATATTGTGACTGGCTTAGTCTTCCTCCACTCACAGTGCATTGTGCACCTGGACCTGAAGCCTGCTAATGTATTAATCACCGAGCA????AGTCATACTTCTTTGCATATTTGTAATGCTTTATTTTAATAGGGAG-AGAGTGTGTGTGATATTAATTGAAACAGAGATGCACGCTAGTTATCCAGCAGTTATGAACAGCATAAATCATATCCATGAAAGTCATTTCAAACAGATCTGTGTTTCAGTGTATGTATTTATCTGGCTTTCAGCAGGATTGATATATTCATAAAAATCATTGCATTTTAAAAATGAAAAGCCAGATTCATCATTGTTGTTCCAGTTTTACATCAGTGTAACTCCACTGAACCCAGCATAGAGTTAGGCTAGTGATAGGGGTGAACCAGATCCAATGTTTTGTGTTTCAAGCAATCTGGTAGGCATTAGGTTGACTCTATGAGATCTGTGGGTTTTACTAAGGCAGATTTTTTTCC-TTCATCCTCACAGTTCTGAGTCACGCCCTTTGCCAGTCATCTCTGGGTAAGAAACTGAAGCTTGACTGAGAAGTGAGGAAGAATGTTTATATCTTTGTAATTATTGAAGCATTGCTAC---ATTTTGGTGCAATGTATGGAAAGGATAAATATAACAAAGGACACGTACACGTGAGTCCTTTGCTGGGCACGTGAACATGTTGGGAATTGTCCAAGGTCATTTTTGTCCTATGGATGTGTCTGGAGTCAGCCTCTCAGCTCCTTTCCATGAAGAATGAGAATTATAATGCATGTGAAGTCCAGTCCTGCCTGGAACTGAGTGGCCTC-AAACCCCATTGACTTTGGGAGTTGCAGATGCTCAGCATCTC--ACCGGATTGGCTCAATGGTCACCTAAGAATTGTTTAGAATCGGAGCTGCTTCTTTGGCAGACCTCATGCATCCATATTTATCATTTCATTTGCAGCATAAGGCATTCTGAGAAATACAGAGAGAGTGGG--AAAGGGACTATAT-GAGGACATTTGTCTTCTAGCATCTGTCAAAGTCACAAAGCTTAACAGGAATCAATGAAAATCTGTGACTTCTATTTCTGTCATATTAAAAGTGTGATGTTTTTGTTATTCCTGGAAATATATTATGTGACTGAAGTGATTTAATTTCTTAATGTTCTGTCTTTCAGATACAGATGGCTATCCAGCACATAG
Mesoclemmys_nasuta		CCCTAAACATAGATTTTTTCAANA----AAAAAAATCCGCCC-AGAGTCNTTTTACCCAAAATTTGGAACTCAAAGGGCTTGGCGG-GGNCTCAAA-CCCCACTNGAGGAGNCTGTTCTATAATCGATAATCCACGATTTACCTCACCACCCTTAGCCC-CC-AGCCTATATNCCTCCGTCTTCAGCCTACCCTGTGAAAGGAT-TAAAGTAGGCACAATAGTCAACAAGCA--CTAACAAGTCAGGTCAAGGTGTATCCAA-TTAGGTGGAAGAAATGGGCTACATTTTCTAT-A-ATAGAAATAT-TCTTAC----GGAGGGCACTTTGAAA--CAGGACCC-AATAAGCAGGATTTAGCAGTAATGTA-GAAGCAGAGAGCCCACATTAATTAGGACCTGA-GAC?????????????????????????????????AGGGGTGATGCCKGCCCAGTGACACTGTTCAACGGCCG-CGGTATTCTGACCGTGCGAAGGTAGCATAATCACTTGTCTTTTAAATAAAGACTGGAATGAATGGCTAAACGAG-GCTCTATCTGTCTCTTACAGG-AAACCAGTGAAATTGATCCCCTCGTGCAAAAGCGGGAATAATAACATAAGACGAGAAGACCCTGTGGAACTTTAAATTAAAAGTTAACAACTAACAAACTCAC-------AAACCATATGG-AGCACATATCATGATTCCA-CTTAGCCTTAATTTTCGGTTGGGGTGACCTCGGAGAAAAACAAAACCTCCGAAGA-CTAA-----------YACTAAGA-ACAAYAGACCAAAGTG-CCTCCGGCA--AAACGATCCAATAYATTTGATTAATGAACCAAGCTACCCCAGGGATAACAGCGCAATCCCCTCTTAGAGT-CCCTATCAACGATGGGGGTTTACGACCTCGATGTTGGATCAGGACATCCTAATGGTGCAGCCGCTATTAAGGGTC????????????????????????????????????????????????????????????????????????????????????????????????????????????????????????????????????????????????????????????????????????????????????????????????????????????????????????????????????????????????????????????????????????????????????????????????????????????????????????????????????????????????????????????????????????????????????????????????????????????????????????????????????????????????????????????????????????????????????????????????????????????????????????????????????????????????????????????????????????????????????????????????????????????????????????????????????????????????????????????????????????????????????????????????????????????????????????????????????????????????????????????????????????????????????????????????????????????????????????????????????????????????????????????????????????????????????????????????????????????????????????????????????????????????????????????????????????????????????????????????????????????????????????????????????????????????????????????????????????????????????????????????????????????????????????????????????????????????????????????????????????????????????????????????????????????????????????????????????????????????????????????????????????????????????????????????????????????????????????????????????????????????????????????????????????????????????????????????????????????????????????????????????????????????????????????????????????????????????????????????????????????????????????????????????????????????????????????????????????????????????????????????????????????????????????????????????????????????????????????????????????????????????????????????????????????????????????????????????????????????????????????????????????????????????????????????????????????????????????????????????????????????????????????????????????????????????????????????????????????????????????????????????????????????????????????????????????????????????????????????????????????????????????????????????????????????????????????????????????????????????????????????????????????????????????????????????????????????????????????????????????????????????????????????????????????????????????????????????????????????????????????????????????????????????????????????????????????????????????????????????????????????????????????????????????????????????????????????????????????????????????????????????????????????????????????????????????????????????????????????????????????????????????????????????????????????????????????????????????????????????????????????????????????????????????????????????????????????????????????????????????????????????????????????????????????????????????????????????????????????????????????????????????????????????????????????????????????????????????????????????????????????????????????????????????????????????????????????????????????????????????????????????????????????????????????????????????????????????????????????????????????????????????????????????????????????????????????????????????????????????????????????????????????????????????????????????????????????????????????????????????????????????????????????????????????????????????????????????????????????????????????????????????????????????????????????????????????????????????????????????????????????????????????????????????????????????????????????????????????????????????????????????????????????????????????????????????????????????????????????????????????????????????????????????????????????????????????????????????????????????????????????????????????????????????????????????????????????????????????????????????????????????????????????????????????????????????????????????????????????????????????????????????????????????????????????????????????????????????????????????????????????????????????????????????????????????????????????????????????????????????????????????????????????????????????????????????????????????????????????????????????????????????????????????????????????????????????????????????????????????????????????????????????????????????????????????????????????????????????????????????????????????????????????????????????????????????????????????????????????????????????????????????????????????????????????????????????????????????????????????????????????????????????????????????????????????????????????????????????????????????????????????????????????????????????????????????????????????????????????????????????????????????????????????????????????????????????????????????????????????????????????????????????????????????????????????????????????????????????????????????????????????????????????????????????????????????????????????????????????????????????????????????????????????????????????????????????????????????????????????????????????????????????????????????????????????????????????????????????????????????????????????????????????????????????????????????????????????????????????????????????????????????????????????????????????????????????????????????????????????????????????????????????????????????????????????????????????????????????????????????????????????????????????????????????????????????????????????????????????????????????????????????????????????????????????????????????????????????????????????????????????????????????????????????????????????????????????????????????????????????????????????????????????????????????????????????????????????????????????????????????????????????????????????????????????????????????????????????????????????????????????????????????????????????????????????????????????????????????????????????????????????????????????????????????????????????????????????????????????????????????????????????????????????????????????????????????????????????????????????????????????????????????????????????????????????????????????????????????????????????????????????????????????????????????????????????????????????????????????????????????????????????????????????AATTGAAGCAGAGATGCACGCTAGTTATATAGCAGTTATGAACAGCATAAATCATATCCATAAAAGTCATTTCAAACAGATCTGTGTTTCAGTGAATGTATTTATCTGGCTTTCAGCAGGATTGAAATAGTCATAAAAATCATGGCATTTTAAAAATGAAAAGCCAGATTCATCATTGTTGTTCCAGTTTTACATTAGCGTAACTCCACTGAACCCAGCATAGAGTTAGGCTAGTGATAGGGGTGAATCGGACCCAATGTTTTGTGTTTCAAGCAATCTGGCAGGCATTAGATTGACTCTGAGAGATCTGTGAGTTTTACTAAGGCAGATTTTTTTCC-TCCATCCTCACAGTTCTGAGTCACACCCTTTGCCAGTCATCTCTGGGTAAGAAACTGAAGCTTGTCTGAGAAGTGAGGAAGAATGTTTCAATCTTTGTAATTATTGAAGCATTACTAC---ATTTTGGTGCAATGTATGGAAAGGATTAATATAACAAAGGATACTTACAAGTGAGTCCTTTGCTGGGCACGTGAACGTGTTGGGAATTGTTAAGGGTCATTTTTGTCCTACGGATGTGTCTGGAGTCAGCCTTTCAGCTCCTTTCCATGAAGAATGAGAATTATAATGCATATGAAGCCTGGTCTTGCCTGGCACTGAGTGCCCCCCAAACCCCATTGACTTTGGGAGTCGCAGATGTTCAGCATCTC--ACCGGATTGGCTCAATGGTCGCCTAAGAATTGTTTAGAATCAGAGCTGCTTCTTTGGCAGACCTCATGCATCAATATTTATCATTTCGTTTGCAGCATAAGGCATTCTGAGAAATACAGAGAG-GGGGG--AAAGGGACTGTAT-GAGGACATTTGTCTTCTAGCATCTGTCAAAGTCACAAAGCTTAACAGGAATCAATGAAAATCTGTGACTTCTATTTTTGTCATATTAAAAGTGTGAAGTTTTTGTTATTCCTGGAAATATA??????????????????????????????????????????????????????????????????????
Elseya_irwini			????????????????????????????????????????????????????????????????????????????????????????????????????????????????????????????????????????????????????????????????????????????????????????????????????????????????????????????????????????????????????????????????????????????????????????????????????????????????????????????????????????????????????????????????????????????????????????????????????????????????????????????????????????????????????????????????????????????????ACTGTTTAACGGCCG-CGGTATCCTGACCGTGCGAAGGTAGCGTAATCACTCGTCTTTTAAATAAAGACTGGAATGAATGGCTAAACGAG-GTTCTATCTGTCTCTTACAAA-CAATCAGTGAAATTGATCTCCCCGTGCAAAAGCGAGAATAACCACATAAGACGAGAAGACCCTGTGGAACTTTAAGT--ATAGGTCACAATCATCAGCCAAAT-------ATTCAACAGAA-AACACC--TTACAATACAC-CTGACTTAAAACTTTCGGTTGGGGCGACCTCGGAGAACAAAAAAACCTCCGAAA--ATTAC----------TACCAAGATAACACAAACCTAAGTGTC-TACGACA--AAACGATCCAATATATATGATCAACGAACCAAGCTACCCCAGGGATAACAGCGCAATCCCCTCTTAGAGT-CCATATCAATGATGGGGGTTTACGACCTCGATGTTGGATCAGGACAC?????????????????????????????TTTATCTAATTTTTGGGGCCTGAGCAGGAATAATCGGAACAGCCCTTAGTCTATTAATTCGAACAGAATTAAGTCAACCAGGACCCCTACTAGGAGACGATCAAGTGTACAATGTAATTGTTACAGCCCATGCCTTCATCATAATCTTTTTTATAGTCATACCAATTATAATCGGTGGATTTGGAAACTGATTAGTCCCAATAATAATTGGATCGCCAGACATAGCATTTCCACGTATAAATAACATAAGCTTCTGACTTCTACCTCCATCACTACTACTACTCCTAGCCTCCTCCGGCATTGAAGCCGGGGCTGGAACAGGATGAACTGTTTACCCCCCTTTAGCAGGCAACATAGCCCACGCTGGGGCTTCTGTAGACCTAACCATCTTCTCCCTACACTTAGCCGGGGCATCTTCAATTTTAGGGGCTATCAACTTCATCACCACTGCAATCAATATAAAAACCCCATCAATATCACAATACCAAACACCACTTTTCGTATGATCCGTACTTATCACAGCTGTATTACTACTACTTTCTCTTCCAGTACTAGCTGCAGGCATTACAATACTCTTAACAGACCGAAACCTAAATACAACCTTCTTTGATCCATCTGGTGGAGGAGACCCAATTCTGTACCAACACCTG?????????????????????????????????????????????ATCCTTGCTGGTGTACTACTAAAACTAGGTGGATACGGCATTATCCGAGTATCTTCAATTTTAGACCCA-CCCCTAAAAAATCCATATCATCCATTCATGATGCTAGCACTATGAGGAATCATCATAACTAGCCTGATCTGCCTGCGACAGACCGACCTAAAGTCACTAATCGCCTATTCATCCGTAAGCCACATAGGACTTGTTATCGCCTCTACACTTGTGCAAACCCAATGAGCACTAACAGGGGCTATCACCCTTATAATTGCCCACGGTTTAACATCATCCATACTATTCTGCCTATCAAATACAAACTACGAACGAACAAACAGCCGAATTTTAATCCTAACACGCAACATACAAATTCTACTCCCACTAATAGCCATATGATGACTTTCTGCCTGCCTTACTAACATGGCCCTACCACCAACTATCAACCTCATAGGAGAACTATCCATTATTACCTCACTATTCAACTGATCCAATACTACTATCTTAGTCACAGGACTAGGCACCATCCTAACAGCTACATATACGCTCTATATATTCTCAACTACTCAACTAGGGGGTGAATCACCATCAAAC---ATCTTAACCATTCCACCAACCCAAACACGAGAACACCTAATCATAACACTACACATCCTACCCATAATATTACTAATAACAAAACCACAACTAATCTCAAATGTATTATGTTAATATAGTTTTAATACAAACATTAGACTGTGGATCTAAAAATAGGAG?TAAAAAACACAAATCCACTACTAAAAATTATCAACAACACCTTAATCAACCTACCCACCCCCCCCAATATTTCATCTTTATGAAATTTCGGATCATTACTAGGAGCATGCCTCATTCTACAACTAGCCACAGGAATCTTCCTAGCCATACACTACTCACCCGACATCTCCACAGCATTCTCATCAATCTCACACATTCAACGGGACGTCCAATACGGATGACTAATCCGAAATATACACGCCAACGGCGCCTCACTATTCTTTATGTGTATCTACCTTCACATTGGACGGGGAATCTACTACGGCTCCTATCTCTACAACAAAACTTGAAACACAGGAGTAATATTACTGTTCCTAGTCATAGCCACTGCATTCGTAGGCTACGTATTACCATGGGGACAGATATCATTCTGAGGAGCCACAGTAATCACCAACCTTTTATCAGCCATTCCATACGTAGGCCCCACACTTGTAGAGTGAATCTGAGGGGGATTCTCTGTAGACAACGCCACCCTAACCCGATTCTTCACATTCCATTTTCTAATCCCATTCGCCATCCTAGGAATAACCATACTACACCTCCTATTACTACACGAAACAGGATCAAATAACCCAACAGGACTAAACTCAAACTGTGACAAAATTCCATTCCACCCCTACTTCTCCTATAAAGATCTACTAGGTCTCATTCTAATAATTACATGCCTGCTCACTCTGGTCCTATTCTACCCAAACCTACTAGGAGACCCAGACAACTTCACACCAGCGAACCCACTAACCACC????????????????????????????????????????????????????????????????????????????????????????????????????????????????????????????????????????????????????????????????????????????????????????????????????????????????????????????????????????????????????????????????????????????????????????????????????????????????????????????????????????????????????????????????????????????????????????????????????????????????????????????????????????????????????????????????????????????????????????????????????????????????????????????????????????????????????????????????????????????????????????????????????????????????????????????????????????????????????????????????????????????????????????????????????????????????????????????????????????????????????????????????????????????????????????????????????????????????????????????????????????????????????????????????????????????????????????????????????????????????????????????????????????????????????????????????????????????????????????????????????????????????????????????????????????????????????????????????????????????????????????????????????????????????????????????????????????????????????????????????????????????????????????????????????????????????????????????????????????????????????????????????????????????????????????????????????????????????????????????????????????????????????????????????????????????????????????????????????????????????????????????????????????????????????????????????????????????????????????????????????????????????????????????????????????????????????????????????????????????????????????????????????????????????????????????????????????????????????????????????????????????????????????????????????????????????????????????????????????????????????????????????????????????????????????????????????????????????????????????????????????????????????????????????????????????????????????????????????????????????????????????????????????????????????????????????????????????????????????????????????????????????????????????????????????????????????????????????????????????????????????????????????????????????????????????????????????????????????????????????????????????????????????????????????????????????????????????????????????????????????????????????????????????????????????????????????????????????????????????????????????????????????????????????????????????????????????????????????????????????????????????????????????????????????????????????????????????????????????????????????????????????????????????????????????????????????????????????????????????????????????????????????????????????????????????????????????????????????????????????????????????????????????????????????????????????????????????????????????????????????????????????????????????????????????????????????????????????????????????????????????????????????????????????????????????????????????????????????????????????????????????????????????????????????????????????????????????????????????????????????????????????????????????????????????????????????????????????????????????????????????????????????????????????????????????????????????????????????????????????????????????????????????????????????????????????????????????????????????????????????????????????????????????????????????????????????????????????????????????????????????????????????????????????????????????????????????????????????????????????????????????????????????????????????????????????????????????????????????????????????????????????????????????????????????????????????????????????????????????????????????????????????????????????????????????????????????????????????AGTCATACTTCTTTGCATATTTGTAATGCTTTATTTAAATAGGGAG-AGAGTGTGTGTGATATTAATTGAAACAGAGATGCACGCTAGTTATCCAGCAGTTATGAACAGCATAAATCATATCCATGAAAGTCATTTCAAACAGATCTATGTTTCAGTGTATGTATTTATCTGGCTTTCAGCAGGATTGATATATTCATAAAAATCATTGCATTTTAAAAATGAAAAGCCAGATTCATCATTGTTGTTCCAGTTTTACATCAGTGTAACTCCACTGAACCCAGCATAGATTTAGGCTAGTGATAGGGGTGAACCAGATCCAATGTTTTGTGTTTCAAGCAATCTGGTAGGCATTAGGTTGACTCTATGAGATCTGTGGGTTTTACTAAGGCAGATTTTTTTCC-TTCATCCTCACAGTTCTGAGTCACACCCTTTGCCAGTCATCTTTGGGTAAAAAACTGAAGCTTGACTGAGAAGTGAGGAAGAATGTTTATATCTTTGTC????????????????????????????????????????????????????????????????????????????????????????????????????????????????????????????????????????????????????????????????????????????????????????????????????????????????????????????????????????????????????????????????????????????????????????????????????????????????????????????????????????????????????????????????????????????????????????????????????????????????????????????????????????????????????????????????????????????????????????????????????????????????????????????????????????????????????????????????????????????????????????????????????????????????????????????????
Rheodytes_leukops		CCCTAAACCT-AGATTTTTT--ATTTTATAAA-AATTGGCCAGAGAAACTACAAACCAAATGTTGGAAACTCAAGGGACTTGGCGGCTGCCCCAAA-CCCACCTAGAGGAGCCTGTTCTATAATCGATAATCCACGATTCACCTCGCCACCTCTCGCCC-AC-AGCCTATATACCTCCGTCCACAGCTTACCCTGCTAAGGAAT-AAAAGTAAGCACAATAGTTCA-TNCAA--CTANCAAGTCAGGTCAAGGTGTAGCCAACTGAGGTGGAAGAAATGGGCTACATTTTCTACAC--TAGAAATA---TTCA-C---GGAAAGAGCCTTGAAA--TATGGACCT-AAAAGTAGGATTTAGCAGTAATGTG-AAANCAGAGANCCCACATTAACCCGGATCTGG--GC?????????????????????????????????AGGAGTGATGCCTGYCCAGTGACACTGTTTAACGGCCG-CGGTATCCTGACCGTGCGAAGGTAGCGTAATCACTCGTCTTTTAAATAAAGACTAGAATGAATGGCTAAACGAG-GTTCTATCTGTCTCTTACAAA-TAATCAGTGAAATTGATCCCCTCGTGCAAAAGCGAGAATAATTCCACAAGACGAGAAGACCCTGTGGAACTTTAAGC--ATGAGTCATTACCACTAACTAACT-------ACTCAACAGAA-AACACTACTTAT---CCAC-CTGACTCTAAACTTTCGGTTGGGGCGACCTCGGAGAACAATAAAACCTCCGAAA--ATTAC----------TACTAAGACAACACAAACCTAAGTGCC-TTCGGCA--AAACGATCCAATTTAAATGATCAACGAACCAAGCTACCCCAGGGATAACAGCGCAATCCCCTCTTAGAGT-CCATATCAATGACGGGGGTTTACGACCTCGATGTTGGATCAGGACATCCTAATGGTGCAACCGCTAATAAGGGTTCTTTACCTAATTTTCGGGGCCTGAGCAGGAATAATCGGAACAGCTCTTAGTCTTTTAATTCGAACAGAATTAAGTCAACCAGGACCCCTACTAGGAGATGATCAAGTATACAATGTCATTGTTACAGCCCATGCCTTCATTATAATCTTTTTTATAGTTATACCCATTATGATTGGTGGATTTGGAAATTGACTAGTCCCAATAATAATCGGATCACCAGACATAGCATTCCCACGCATAAATAATATAAGTTTCTGATTGCTACCACCGTCACTACTACTACTCCTAGCCTCCTCCGGCATTGAAGCCGGGGCTGGAACAGGGTGAACTGTATACCCACCTTTAGCTGGCAATATAGCCCATGCTGGAGCTTCTGTTGATCTAACTATCTTCTCATTACACTTAGCCGGAGCATCCTCAATTCTAGGGGCTATCAACTTCATCACCACCGCAATTAACATAAAAACCCCATCAATGTCACAATACCAAACACCACTTTTCGTGTGATCAGTACTTATCACAGCTGTATTATTACTACTCTCCCTTCCAGTACTTGCCGCAGGCATTACAATACTGTTAACTGACCGAAACTTAAATACTACCTTCTTTGACCCATCCGGTGGAGGAGACCCAATCCTATATCAACACTTA?????????????????????????????????????????????ATTCTTGCTGGAGTCCTATTAAAACTAGGGGGATACGGCATCATCCGAATATCACTAATCATAAATCCT-CCACTAAAAAACCCACATTACCCATTCATGATACTAGCTCTATGAGGAATCATTATAACCAGCCTAATTTGCCTACGTCAAACTGACCTAAAATCACTAATTGCTTATTCATCTGTAAGTCATATAGGCCTTGTCATTGCCTCTACATTTGTACAAACCCAATGAGCACTCACCGGGGCTATTACCATAATAATCGCCCACGGCCTAACATCATCAATACTATTCTGCCTATCAAACACAAGCTATGAACGAACAAACAGTCGAATTATAATCCTAACACGTAACATACAACTTCTACTCCCACTAATAACCCTATGATGACTTTCTGCCAGTTTAACCAACATAGCTCTACCCCCAACCATTAATCTTATAGCAGAATTATCTATCATCACTTCACTATTCAACTGGTCAAATCCAACCATTTTAATCACAGGACTAGGTACTATCTTATCAGCTACATACACACTCTATATATTCTCAACCACCCAATTAGGAGGAGAGCTACCATCAAAC---ATCCTAACCATCCCCCCAACCCAAACACGAGAACACCTTATCATAACACTACACATCCTACCCATAATCTTACTAATAATAAAACCACAGCTAATCTCGGGCATATTATGTTAATATAGTTTTAATACAAACATTAGATTGTGGATCTAAAAATAGGAG?TAAAAAACACTAACCCACTATTAAAAACCATCAACAACGCCCTAATCAACCTACCCACCCCATCTAATATTTCCGCTTTCTGAAACTTCGGTTCATTACTAGGAGCATGTCTCATCGTACAACTAGCCACAGGAATCTTCTTAGCTATACACTACTCATCTGACATCTCCACAGCATTCTCATCAATCTCCCACATCCAACGAGACGTCCAGTATGGATGACTAATTCGAAATATACACGCAAATGGTGCCTCACTATTTTTCATATGCATCTACCTCCACATCGGACGAGGGATCTACTACGGCTCCTACCTCTACAACAAAACATGAAACACCGGAGTAGTACTGCTACTACTAGTCATAGCTACTGCATTTGTAGGCTACGTACTGCCATGAGGCCAAATATCATTCTGAGGGGCCACAGTAATCACCAACCTCCTATCGGCCATTCCATATGTGGGCCACACACTTGTAGAATGAATCTGAGGTGGGTTCTCCGTAGACAACGCCACCCTAACCCGATTCTTCACATTCCATTTTCTAATCCCATTCATCATCATAGGAATAACAATATTACACCTCCTACTACTACACGAAACAGGGTCAAACAACCCAACAGGATTAAACTCGAACTGTGACAAAATCCCATTCCACCCCTACTTCTCCTACAAAGACCTACTGGGCCTCATCCTAATAATCGCATGCCTACTCACCCTAACCCTATTCTACCCAAACATACTAGGAGACCCAGACAACTTCACACCAGCTAACCCACTAACCACG???????????????????????????????????????????????????????????????????????????????????????????????????????????????????????????????????????????????????????????????????????????????????????????????????????????????????????????????????????????????????????????????????????????????????????????????????????????????????????????????????????????????????????????????????????????????????????????????????????????????????????????????????????????????????????????????????????????????????????????????????????????????????????????????????????????????????????????????????????????????????????????????????????????????????????????????????????????????????????????????????????????????????????????????????????????????????????????????????????????????????????????????????????????????????????????????????????????????????????????????????????????????????????????????????????????????????????????????????????????????????????????????????????????????????????????????????????????????????????????????????????????????????????????????????????????????????????????????????????????????????????????????????????????????????????????????????????????????????????????????????????????????????????????????????????????????????????????????????????????????????????????????????????????????????????????????????????????????????????????????????????????????????????????????????????????????????????????????????????????????????????????????????????????????????????????????????????????????????????????????????????????????????????????????????????????????????????????????????????????????????????????????????????????????????????????????????????????????????????????????????????????????????????????????????????????????????????????????????????????????????????????????????????????????????????????????????????????????????????????????????????????????????????????????????????????????????????????????????????????????????????????????????????????????????????????????????????????????????????????????????????????????????????????????????????????????????????????????????????????????????????????????????????????????????????????????????????????????????????????????????????????????????????????????????????????????????????????????????????????????????????????????????????????????????????????????????????????????????????????????????????????????????????????????????????????????????????????????????????????????????????????????????????????????????????????????????????????????????????????????????????????????????????????????????????????????????????????????????????????????????????????????????????????????????????????????????????????????????????????????????????????????????????????????????????????????????????????????????????????????????????????????????????????????????????????????????????????????????????????????????????????????????????????????????????????????????????????????????????????????????????????????????????????????????????????????????????????????????????????????????????????????????????????????????????????????????????????????????????????????????????????????????????????????????????????????????????????????????????????????????????????????????????????????????????????????????????????????????????????????????????????????????????????CAAGAACCGGCTGGCATCGCGGCAAAGCTTCTGGGCTGAGCTGAATGTGGCCCGGCTACACCATCACAATGTGGTACGTGTTGTAGCTGCCAGCACTTGTGCCCCTGCCAACCAAGAGAGCCTGGGCACTATAATCATGGAATATGCTGGCCACACTACCCTGCACCATGTCATCTATGGCACTGGCTGCCTGCAGGGAAAGGGAGAGGATGACGGGGGTGGATGTGGCAAGGAACCCTTAAGCATCACTGAGTCCCTGGGTTATTCCTCTGATATTGTGACTGGCTTAGTCTTCCTCCACTCACAGTGCATTGTGCACCTGGACCTGAAGCCTGCTAATGTATTAATCACCGAGCA????AGTCATACTTCTTTGCATATTTGTAATGCTTTATTTAAATAGGGAG-AGAGTGTGTGTGATATTAATTGAAACAGAGATGCACGCTAGTTATCCAGCAGTTATGAACAGCATAAATCATATCCATAAAAGTCATTTCAAACAGATCTATGTTTCAGTGTATGTATTTATCTGGCTTTCAGCAGGATTGATATATTCATAAAAATCATTGCATTTTAAAAATGAAAAGCCAGATTCATCATTGTTGTTCCAGTTTTACATCAGTGTAACTCCACTGAACCCAGCATAGAGTTAGGCTAGTGATAGGGGTGAACCAGATCCAATGTTTTGTGTTTCAAGCAATCTGGTAGGCATTAGGTTCACTCTATGAGATCTGTGGGTTTTACTAAG-CAGATTTTTTTCC-TTCATCCTCACAGTTCTGAGTCACGCCCTTTGCCAGTCATCTCTGGGTAAGAAACTGAAGCTTGACTGAGAAGTGAGGAAGAATGTTTATATCTTTGTAATTATTGAAGCATTGCTAC---ATTTTGGTGCAATGTATGGAAAGGATAAATATAACAAAGGACACGTACAAGTGAGTCCTTTGCTGGGCACGTGAACATGTTGGAAATTGTCCAAGGTCATTTTTGTCCTATGGATGTGTCTGGAGTCAGCCTCTCAGCTCCTTTCCATGAAAAATGAGAATTATAATGCATGTGAAGTCCAGTCCTGCCTGGAACTGTGTGGCCTC-AAACCCCATTGACTTTGGGAGTTGCAGATGCTCAGCATCTC--ACCGGATTGGCTCAATGGTCACCTAAGAATTGTTTAGAATCGGAGCTGCTTCTTTGGCAGACCTCATGCATCCATATTTATCATTTCATTTGCAGCATAAGGCATTCTGAGAAATACAGAGAGAGTGGG--AAAGGGACTATAT-GAGGACATTTGTCTTCTAGCATCTGTCAAAGTCACAAAGCTTAACAGGAATCAATGAAAATCTGTGACTTCTATTTCTGTCATATTAAAAGTGTGATGTTTTTGTTATTCCTGGAAATATATTATGTGACTGAAGTGATTTAATTTCTTAATGTTCTGTCTTTCAGATACAGATGGCTATCCAGCACATAG
Emydura_subglobosa		CCCTAAACCT-AAATTTTTTTCAACATACAAA-AATTTGCCAGAGAA-CTACAAACCAAATGTTTGAAACTCAAAGGACTTGGCGG-TGCCCCAAA-CCCACCTAGAGGAGCCTGTTCTATAATCGATAATCCACGATTCACCTCACCACCTCTCGCCC-AC-AGCCTATATACCTCCGTCCACAGCTTACCCTACTAAGGAGC-AAAAGTAAGCACAACAGTTTA-CACAA--CTAATAAGTCAGGTCAAGGTGTAGCCAA-TGAGATGGAAGAAATGGGCTACATTTTCTACAC--TAGAAATA---TCCA-C---GGAAAGAGCCCTGAAA--TATGGACCT-AAAAGTAGGATTTAGCAGTAATGTG-AAAGCAGAGAGCCCACATTAACTCGGATCTGG-GACGCGCACACACCGCCCGTCACCCTCCTCGAAAA?AGGAGTGATGCCTGCCCAGTGACACTGTTCAACGGCCG-CGGTATCCTGACCGTGCGAAGGTAGCGTAATCACTCGTCTTTTAAATAAAGACTAGAATGAATGGCTAAACGAG-GTTCTATCTGTCTCTTACAAA-TAATCAGTGAAATTGATCCCCCCGTGCAAAAGCGAGGATAACCCCATAAGACGAGAAGACCCTGTGGAACTTTAAGT--ACGAGTCACTGCCATTAATCGACT-------ACTCAACAGAA-AACACTACCAATAACCCTT-CTGACTTTTAACTTTCGGTTGGGGCGACCTCGGAGAAAAATAAAACCTCCGAAA--ATTAC----------CACTAAGATAATACAAACCTAAGTGCC-TGAGGCA--AAACGATCCAATATATTTGATTAACGAACCAAGCTACCCCAGGGATAACAGCGCAATCCCCTCTTAGAGT-CCATATCAATGACGGGGGTTTACGACCTCGATGTTGGATCAGGACATCCTAATGGTGCAGTCGCTATTAAGGGTTCTTTACTTAATTTTTGGAGCCTGAGCAGGAATAATCGGAACAGCTCTTAGTCTACTAATTCGAACAGAGTTAAGCCAACCAGGACCCCTACTAGGAGATGATCAAGTATACAATGTAATTGTCACAGCCCATGCTTTCATTATAATCTTTTTCATAGTTATACCTATTATAATTGGTGGATTTGGAAACTGATTAGTTCCAATAATAATTGGATCGCCAGATATAGCATTCCCACGGATGAATAATATAAGCTTTTGACTTCTACCCCCATCACTTCTACTTCTTCTAGCCTCCTCCGGTATCGAAGCTGGAGCGGGAACAGGATGAACTGTATATCCCCCTTTGGCTGGAAACATAGCTCACGCCGGAGCTTCTGTCGACCTAACTATCTTCTCCCTACACTTAGCCGGGGCATCCTCAATTTTAGGGGCTATTAACTTTATCACCACTGCGATTAATATAAAAACCCCATCAATATCCCAATATCAAACACCACTTTTCGTATGATCAGTACTTATTACAGCTGTATTACTACTACTATCCCTTCCTGTACTTGCTGCAGGAATTACAATACTTTTAACAGATCGAAATCTAAATACAACCTTCTTTGATCCATCTGGTGGAGGAGACCCAATTTTATACCAACATCTATGACTACCAAAAGCACATGTAGAAGCCCCTATCGCCGGATCAATAATTCTTGCTGGCGTCCTATTAAAACTAGGTGGATACGGCATTATCCGGGTATCACTTATTATAGGCCCC-CCTTTAAAAAACCCATATTACCCATTCATAATACTAGCACTATGAGGAATCATCATAACTAGCTTAATCTGCCTACGCCAAACCGACCTAAAATCACTAATCGCCTATTCATCTGTAGGGCACATAGGACTTGTTATCGCTTCCACATTTGCACAATCCCAATGAGCACTTACAGGAGCCGTCACTATAATAATCGCCCACGGTTTAACATCATCTATACTATTCTGCCTGTCAAACACAAACTACGAACGAACTAACAGCCGAATTTTAATCCTAACACGAAACATACAACTTCTACTACCACTAATAACTCTATGATGACTTTCTGCCAGCCTTACTAACATAGCCTTACCACCAACCATTAACCTCATGGGTGAATTATCTATCATTACTTCACTATTCAACTGATCAAATACTACCATCTTAATCACAGGACTAGGCACAATCCTGTCGGCTACATATACACTCTATATATTCTCAACCACCCAACTGGGAGGTGAGTCACCATCAAAT---ATTACAACTATCCCACCAACCCAAACACGAGAACACCTGATCATAGTACTACATATCCTACCCATAATCTTACTAATAATAAAACCACAACTAATCTCAAGTGTATTCT???????????????????????????????????????????????????TAAAAAACACAAACCCACTATTAAAAATCATTAATAATACCTTTATTGATCTCCCCACTCCACCTAACATCTCCGCTTTGTGAAACTTTGGATCATTACTAGGGGCATGCCTCGCTCTACAACTAGCCACAGGAATCTTCTTAGCGATACACTACTCATCTGATATCTCCATAGCATTCTCATCAATCTCCCACATCCAACGAGATGTTCAATATGGCTGACTAATTCGAAATATACACGCCAACGGTGCTTCATTATTCTTTATGTGCATTTACCTCCATATTGGACGAGGAATTTACTACGGTTCATACCTTTACAACAAAACCTGAAACACTGGGGTAATATTACTACTCCTAGTCATAGCCACTGCATTCGTGGGATACGTACTACCATGAGGACAAATATCATTCTGAGGAGCTACAGTAATCACCAACCTCTTATCAGCCATTCCATACGTAGGCCCTACACTTGTAGAGTGAATCTGAGGGGGATTCTCCGTAGATAGTGCTACCCTTACTCGATTCTTCACATTCCACTTTCTAATCCCATTCGCTATCCTAGGGATAACTATACTACATCTACTACTGCTACATGAAACAGGATCAAACAACCCAACAGGACTAAACTCAAACTGTGACAAAATCCCATTCCACCCATATTTCTCTTATAAAGATCTACTAGGCCTCATTCTGATAATCACACTTCTACTCACTCTTACCCTATTCTACCCCAACCTACTAGGAGACCCAGACAACTTTACACCAGCCAACCCACTAACCACCCCACCCCATATCAAACCAGAATGATACTTCCTATTTGCTTATGCAATCTTACGTTCAATCCCCAACAAACTAGGTGGCGTCTTAGCCCTATTCATATCAATCCTAGTACTACTATTCATACCTATCCTCCACCTATCAAAACAACGAACAGCCACATTCCGACCAATAACACAAATCCTCTTCTGATGCCTAACCACTGATCTCCTAATCCTAACATGAATCGGAGGCCAACCAGTAGAAGACCCGTTCATCCTCATCGGACAAATCGCCTCCCTGCTATACTTTGCCATCATCTTTATCATCACACCCATAACAAGTCTAATTGAAAACAA--AATACTAAACCACCAATAAAAAGAAAGCAGAGGAGGTGGCCTCTTTGGACAAAGGCACTGTGGTGCAGATGGATGC---GGCAGTTCCAATGGCAGAAAAGCCACTTCTGGCACACACAGCCTTAAAGGACAATAAGCAGGCTCTTGAAAAAGATGCTGACAATGTGAAAATGCAAGAGAATGCAGCTCATCAAGCAAACCTGCAGCAGCTCTGTCGCATCTGTGGAGTTTCATTTAAAACTGATCGCTATAAGAGAAGTCACCCAGTGCATGGACCAGTGGACAGTGAAACTCAGGGACTTCTGAGAAAGAAAGAGAAAAGAGCAACATCGTGGCCAGATCTTATTGCCAAGGTTTTTAAGATTGACGTGCGAGGTGATATTGACACAATCCACCCCACTCGGTTTTGTCACAACTGCTGGAGCATCATCCATAGAAAGTTCAGCAATGCACCATGTGAAGTGTATTTCCCGAGGAACAGCACCATGGAGTGGCAGTCCCATTCCCCGAGCTGCACTGTTTGTTGCACTGCTCATCGTGGGGTCAAGAGAAAGAACCAGCCATCCAACTTACAGCTCAGCAAAAGGCTCAAGATCATTGCAGAACGTGCCCGAAAAACTAACAGTGTAAAAAAA---CAAGCACAGGTAAAAAACAAAAACCTTATGAAAAAGATTGCCAACTGCAAAAAGATACATCTTAGCACTAAACTTCTTGCAGTTGACTACCCTGCAGATTTCATTAA-GTCCATCTCTTGCCAAGTCTGTGAGCATATTCTGGCAGATCCAGTGGAAACGACATGTAGCCACTTGTTCTGCAGAACCTGCATCCTGAAGTGCCTCAAAGTTATGGGCAGCTATTGCCCCTCCTGCCGATACCCTTGCTTCCCTACCGACTTGGAGAGCCCAGTGAAATCCTTCCTGAACATCCTCAATTCCCTGGCTGTGCGATGCCCAGTGAAAGAATGTGATGAGGAGGTTTTGCTGGGTAAATACTGCCATCATTTGTCCAGCCACAAAGAGCTGAAAGGGAAAGAGATTTACACACACATAAATAAAGGCGGCAGACCAAGGCAACACTTATTGTCATTGACTAGGAGAGCTCAAAAGCATCGTCTGAGAGAACTCAAGCTTCAAGTCAAAGCTTTTGCTGAGAAAGAAGAAGGAGGTGATATAAAGGCTGTGTGCCTAACTTTGTTCCTGCTGGCTCTCAGAGCAAGAAATGAACACAGACAAGCAGATGAGTTGGAAGCTATAATGCAAGGGAAGGGATCAGGGCTTCACCCGGCTGTTTGCTTGGCAATCCGAGTCAACACCTTTCTCAGCTGTAGCCAGTACCATAAAATGTACAGAACTGTAAAAGCCATAAGTGGGAGGCAGATCTTCCAGCCACTGCATGCTCTCCGCACTGCTGAAAAGGCCCTCCTTCCAGGTTATCATCCATTTGAGTGGAAGCCCCCTTTGAAAAATGTGTCCACTAATACAGAAGTGGGAATTATAGATGGGCTGTCAGGGCTGCCACATTCAGTTGATGACTACCCAGTAGACACAATTTCCAAGAGGTTTCGATATGATGCAGCCTTAGTTTCTGCCTTAATGGACATGGAGGAAGACATCTTGGAAGGGATGAAAGCCCAAGACCTGGATGACTACTTGAATGGTCCCTTCACTGTGGTGGTGAAGGAGTCTTGTGATGGGATGGGAGATGTCAGCGAGAAGCATGGAAGTGGACCGGCTGTTCCTGAGAAGGCAGTTCGATTTTCTTTCACACTCATGAGCATCACTATAGCTCATGGCAATGAAAATGTAAGGATCTTTGAAGAAGCCAAGCCTAATTCAGAGCTGTGTTGCAAACCCCTGTGTCTTATGCTGGCTGATGAATCGGACCATGAGACGCTGACAGCCATTCTGAGCCCTCTCATAGCAGAAAGACAGACCATGAAAAATAGTGTCCTGCTTCTTGAAATGGGAGGCATACTCAGAACATTCAAATTCATCTTTAGAGGTACAGGGTATGACGAGAAACTTGTCCGTGAAGTGGAAGGCCTTGAAGCCTCAGGCTCTACTTACATCTGCACCCTTTGTGATGCAACCCGCCTGGAAGCCTCTCAGAACTTGGTCCTCCACTCCATAACAAGAAGTCATGCTGAAAACCTGGAGCGGTATGAGGTATGGAGGTCCAACCCATATCATGAATCTGTTGATGAGCTACGTGACAGAGTGAAGGGTGTTTCTGCCAAACCTTTTATTGAGACAGTTCCTTCCATAGATGCATTGCATTGTGACATCGGCAATGCGGCTGAGTTCTACAAGATATTCCAGTTTGAGATAGGTGAGGTGTACAAGAATCCTAACACATCTAAAGAAGAGAGGAAGAGGTGGCAGTCGACTCTTGACAAGCACCTCAGGAAGAAGATGAACCTGAAGCCCATAATGAGGATGAATGGAAACTTTGCTAGAAAGCTTATGAGCAAAGAGACAGTGGAAGCAGTCTGTGAATTAATAACGGGTGAGGAAAGGCATGAAGCCCTAAGAGAACTGATGGATCTTTACCTTAAGATGAAACCAGTGTGGAGGTCTTCATGCCCAGCCAAAGAGTGCCCAGAATTGCTGTGTCAGTATAGCTTCAACTCACAACGTTTTGCTGAGCTCCTGTCCACAAAGTTCAAGTACAGATATGAAGGCAAGATTACAAATTACTTTCACAAAACTCTTGCTCATGTTCCTGAAATCATTGAAAGAGATGGCTCCATTGGGGCCTGGGCAAGTGAAGGGAATGAGTCTGGGAACAAATTGTTTAGGCGTTTC??????????????????????????????????????????????????????????????????????????????????????????????????????????????????????????????????????????????????????????????????????????????????????????????????????????????????????????????????????????????????????????????????????????????????????????????????????????????????????????????????????????????????????????????????????????????AGTCATACTTCTTTGCATATTTGTAATGCTTTATTTAAATAGGGAG-AGAGTGTGTGTGATATTAATTGAAACAGAGATGCACGCTAGTTATCCAGCAGTTATGAACAGCATAAATCATATCCATAAAAGTCATTTCAAACAGATCTATGTTTCAGTGTATGTATTTATCTGTCTTTCAGCAGGATTGATATATTCATAAAAATCATTGCATTTTAAAAATGAAAAGCCAGATTCATCATTGTTGTTCCAGTTTTACATCAGTGTAACTCCACTGAACCCAGCATAGAGTTAGGCTAGTGATAGGGGTGAACCAGATCCAATGTTTTGTGTTTCAAGCAATCTGGTAGGCATTAGGTTGACTCT--GAGATCTGTGGGTTTTACTAAGGCAGATTTTTTTCC-TTCATCCTCACAGTTCTGAGTCACGCCCTTTGCCAGTCATCTCTGGGTAAGAAACTGAAGCTTGATTGAGAAGTGAGGAAGAATGTTTATATCTTTGTAATTATTGAAGCATTGCTAC---ATTTTGGTGCAATGTATGGAAAGGATAAATATAACAAAGGACANGTACAAGTGAGTCCTTTGCTGGGCATGTGAACATGTTGGGAATTGTCCAAGGTCATTTTTGTCCTATGGATGTGTCTGGAGTCAGCCTCTCAGCTCCTTTCCATGAAGAATGAGAATTATAATGCATGTGAAGTCCAGTCCTGCCTGGAACTGAGTGGCCTC-AAACCCCATTGACTTTGGGAGTTGCAGATGCTCAGCATCTC--ACCGGATTGGCTCAATGGTCACCTAAGAATTGTTTAGAATTGGAGCTGCTTCTTTGGCAGACCTCATGCATCCATATTTATCATTTCATTTGCAGCATAAGGCATTCTGAGAAATACAGAGAGAGTGGG--AAAGGGACTATAT-GAGGACATTTGTCTTCTACCATCTGTCAAAGTCACAAAGCTTAACAGGAATCAATGAAAATCTGTGACTTCTATTTCTGTCATATTAAAAGTGTGATGTTTTTGTTATTCCTGGAAATATATTATGTGACTGAAGTGATTTAATTTCTTAATGTTCTGTCTTTCAGATACAGATGGCTATCCAGCACATAG
Elseya_branderhorsti		CCCTAAACCT-AAATTTTTT--AATATA-AAA-AATTTGCCAGAGAACT-ACAAACCAAATGTTTGAAACTCAAAGGACTTGGCGG-TGCCTCAAA-CCCACCTAGAGGAGCCTGTTCTATAATCGATAATCCACGATCTACCTCACCACCTCTCGCTC-AC-AGCCTATATACCTCCGTCCACAGCTTACCCTACTAAGGAAC-AAAAGTAAGCACAATAGTTTA-CACAA--CTAATAAGTCAGGTCAAGGTGTAGCCAACTGAGGCGGAAGAAATGGGCTACATTTTCTACAC--TAGAAATA---TTAA-C---GGAAAGAACCCTGAAA--TATGGACCT-AAAAGTAGGATTTAGCAGTAATGTG-AAAGCAGAGAGCCCACATTAACCAGGATCTGA-GACGCGCACACACCGCCCGTCACCCTCATCAAAAA?AGGAGTGATGCCTGCCCAGTGACACTGTTTAACGGCCG-CGGTATCCTGACCGTGCGAAGGTAGCGTAATCACTCGTCTTTTAAATAAAGACTAGAATGAATGGCTAAACGAG-GTTCTATCTGTCTCTTACAAA-CAATCAGTGAAATTGATCTCCCCGTGCAAAAGCGGGAATAACCCCATAAGACGAGAAGACCCTGTGGAACTTTAAGT--ATAGGTCACAATCATCAACCAACT-------ATTCAACAGAA-AACACC--CTACAAAACAC-CTGACTTAAAACTTTCGGTTGGGGCGACCTCGGAGGATAATAAAACCCCCGAAA--ATTAC----------TACCAAGATAGCACAAATCTAAGTGTC-TACGACA--AAACGATCCAATATACATGATCAACGAACCAAGCTACCCCAGGGATAACAGCGCAATCCCCTCTTAGAGT-CCATATCAATGACGGGGGTTTACGACCTCGATGTTGGA??????????????????????????????????????TTTACCTAATTTTTGGGGCCTGAGCAGGAATAATTGGAACAGCTCTTAGTCTATTAATTCGAACAGAATTAAGTCAACCAGGACCCCTACTAGGAGACGATCAGGTATATAACGTAATTGTCACCGCCCACGCCTTCATTATAATCTTTTTTATAGTCATACCAATTATAATCGGTGGATTTGGAAACTGATTAGTTCCAATAATAATCGGATCGCCAGACATAGCATTTCCACGTATAAATAACATAAGCTTTTGACTCCTACCTCCATCACTACTACTACTCCTAGCCTCCTCCGGCGTTGAAGCTGGGGCTGGAACAGGATGAACTGTCTACCCCCCTTTAGCAGGCAACATAGCCCACGCTGGAGCTTCTGTCGACCTAACCATCTTTTCCTTACATTTAGCCGGGGCATCTTCAATTTTAGGGGCTATCAACTTCATCACCACTGCAATCAATATAAAAACCCCATCAATATCACAATACCAAACACCACTTTTCGTATGATCTGTACTTATCACAGCTGTATTACTATTACTTTCCCTTCCAGTACTAGCCGCAGGCATTACAATACTTTTAACAGACCGAAACCTAAATACAACCTTCTTTGATCCATCTGGCGGAGGAGATCCAATTCTATACCAACATCTATGACTACCAAAAGCACATGTAGAGGCCCCTATCGCCGGATCAATAATCCTTGCTGGTGTACTACTAAAACTAGGCGGATACGGCATCATTCGAGTATCCTTAATTATAGACCCA-CCCCTAAAAAATCCATATCACCCATTCATAATATTAGCACTATGAGGAATCATCATAACTAGCCTGATCTGCCTACGACAAACCGACTTAAAATCACTAATCGCTTATTCATCTGTAAGCCACATAGGACTCGTTATCGCCTCTACATTTGTACAAACTCAATGAGCACTCACAGGAGCTATCACCCTTATAATTGCCCACGGTTTAACATCATCTATACTATTCTGCCTATCAAACACAAACTACGAACGAACGAACAGCCGAATCCTAATCCTAACACGTAACATACAACTTCTACTCCCGCTCATAACCCTATGATGACTTTCTGCCTGCCTTACTAACATAGCCCTACCTCCAACTATCAACCTCATAGGAGAACTATCTATTATTACCTCACTATTCAACTGATCAAATACTACCATCTTAATCACAGGATTAGGAACCATCCTAACAGCTACATACACACTTTACATATTCTCAACCACTCAACTAGGAGGTGAATCACCATCAAAC---ATCTTAACCATTCCACCAACCCAAACACGAGAACACCTAATCATAACACTACATATCCTACCAATAATCCTACTCATAATAAAACCACAACTAATCTCAAGTGTATTAT???????????????????????????????????????????????????TAAAAAACACAAACCCACTATTAAAGATTATCAACAACACCTTAATCGATCTGCCCACCCCATCCAACATTTCCGCTTTATGAAATTTCGGATCATTACTGGGAGCATGCCTCATTCTACAACTAGCCACAGGAATCTTCCTAGCCATACACTACTCACCTGACATCTCCACAGCCTTCTCATCAATCTCCCACATCCAACGAGACGTCCAATACGGATGACTAATCCGAAATATACACGCCAACGGCGCCTCACTATTTTTCATATGTATTTACCTCCACATCGGACGAGGAATCTACTACGGCTCCTACCTTTACAACAAAACCTGAAACACAGGAGTAATACTACTATTCCTAGTCATAGCCACTGCATTCGTAGGCTACGTATTACCATGAGGACAAATATCATTCTGAGGGGCTACAGTAATCACTAACCTTCTATCAGCTATTCCATACGTAGGCCCCACACTCGTAGAATGAATCTGAGGGGGGTTCTCTGTAGACAATGCCACCCTAACCCGATTCTTCACATTCCATTTTCTAATCCCATTCATCATCCTAGGAATAACCATACTACACCTCCTACTTCTACACGAAACAGGATCAAACAACCCAACAGGATTAAATTCAAACTGTGATAAAATCCCATTCCACCCTTACTTCTCCTATAAAGACCTACTAGGCCTCATCCTAATAATCACATGCCTACTCACCCTAGCCCTATTTTACCCAAACCTACTAGGAGACCCAGACAACTTTACACCAGCGAACCCACTAATCACCCCACCACACATTAAACCAGAATGATACTTCCTGTTCGCTTACGCAATTCTACGCTCAATCCCCAATAAATTAGGCGGCGTCCTAGCACTATTTATATCTATCCTAGTCCTACTACTCATACCAACACTCCACTTATCAAAACAACGAACAACCACATTCCGACCAATAGCACAAATCACTTTCTGATGCCTAACCACCGACCTACTAATCCTAACATGAATCGGAGGCCAACCAGTAGAAAACCCATTCATCCTTATTGGACAAATCGCCTCTTTACTATATTTTACCACCATCTTCATCATCATACCTACAACCAACCTAATTGAAAATAA--AATACTAAATCACAAATAAAAAGAAAGCAGAGGAGGTGGCCTCTTTGGACAAAGGCACTGTGGTGCAGATGGATGC---GGCAGTTCCAATGGCAGAAAAGCCACTTCTGGCAGATACAGCCTTAAAGGACAATAAGCAGGCTCTTGAAAAAGATGCTGACAACCTGAAAATGCAAGAGAATGCAGCTCATCAAGCAAACCTGCAGCAGCTCTGTCGCATCTGTGGAGTTTCATTTAAAACTGATCGCTATAAGAGAAGTCACCCAGTGCATGGACCAGTGGACAGTGAAACTCAGGGACTTCTGAGAAAGAAAGAGAAAAGAGCAACATCGTGGCCAGATCTTATTGCCAAGGTTTTTAAGATTGACGTGCGAGGTGATATTGACACAATCCACCCCACTCGGTTTTGTCACAACTGCTGGAGCATCATCCATAGAAAGTTCAGCAATGCACCATGTGAAGTGTATTTCCCGAGGAACAGCACCATGGAGTGGCAGTCCCATTCCCCGAGCTGCACTGTTTGTTGCACTGCTCATCGTGGGGTCAAGAGAAAGAACCAGCCATCCAACTTACAGCTCAGCAAAAGGCTCAAGATCATTGCAGAACGTGCCCGAAAAACTAACAGTGTAAAAAAA---CAAGCACAGGTAAAAAACAAAAACCTTATGAAAAAGATTGCCAACTGCAAAAAGATACATCTTAGCACTAAACTTCTTGCAGTTGATTACCCTGCAGATTTCATTAA-GTCCATCTCTTGCCAAGTCTGTGAGCATATTCTGGCAGATCCAGTGGAAACGACATGTAGCCACTTGTTCTGCAGAACCTGCATCCTGAAGTGCCTCAAAGTTATGGGCAGCTATTGCCCCTCCTGCCGATACCCTTGCTTCCCTACCGACTTGGAGAGCCCAGTGAAATCCTTCCTGAACATCCTCAATTCCCTGGCTGTGCGATGCCCAGTGAAAGAATGTGATGAGGAGGTTTTGCTCGGTAAATACTGCCATCATTTGTCCAGCCACAAAGAGCTGAAACGGAAAGAGATTTACACACACATAAATAAAGGCGGCAGACCAAGGCAACACTTATTGTCATTGACTAGGAGAGCTCAAAAGCATCGTCTGAGAGAACTCAAGCTTCAAGTCAAAGCTTTTGCTGAGAAAGAAGAAGGAGGTGATATAAAGGCTGTGTGCCTAACTTTGTTCCTGCTGGCTCTCAGAGCAAGAAATGAACACAGACAAGCAGATGAGTTGGAAGCTATAATGCAAGGGAAGGGATCAGGGCTTCACCCGGCTGTTTGCTTGGCAATCCGAGTCAACACCTTTCTCAGCTGTAGCCAGTACCATAAAATGTACAGAACTGTAAAAGCCATAACTGGGAGGCAGATCTTCCAGCCACTGCATGCTCTCCGCACTGCTGAAAAGGCCCTCCTTCCAGGTTACCATCCATTTGAGTGGAAACCCCCTTTGAAAAATGTGTCCACTAATACAGAAGTGGGAATTATAGATGGGCTGTCAGGGCTGCCACATTCAGTTGATGACTACCCAGTAGACACAATTTCCAAGAGGTTTCGATATGATGCAGCCTTAGTTTCTGCCTTAATGGACATGGAGGAAGACATCTTGGAAGGGATGAAAGCCCAAGACCTGGATGACTACTTGAATGGTCCCTTCACTGTGGTGGTGAAGGAGTCTTGTGATGGGATGGGAGATGTCAGCGAGAAGCATGGAAGTGGACCGGCTGTTCCTGAGAAGGCAGTTCGATTTTCTTTCACACTCATGAGCATCACTATAGCTCATGGCAATGAAAACGTAAGGATCTTTGAAGAAGCCAAGCCTAATTCAGAGCTGTGTTGCAAACCCCTGTGTCTTATGCTGGCTGATGAATCGGACCATGAGACGCTGACAGCCATTCTGAGCCCTCTCATAGCAGAAAGACAGACCATGAAAAATAGTGTCCTGCTTCTTGAAATGGGAGGCATACCCAGAACATTCAAATTCATCTTTAGAGGTACAGGGTATGACGAGAAACTTGTCCGTGAAGTGGAAGGCCTTGAAGCCTCAGGCTCTACTTATATCTGCACCCTTTGTGATGCAACCCGCCTGGAAGCCTCTCAGAACTTGGTCCTCCACTCCATAACAAGAAGTCATGCTGAAAACCTGGAGCGGTATGAGGTATGGAGGTCCAACCCATATCATGAATCTGTTGATGAGCTACGTGACAGAGTGAAGGGTGTTTCTGCCAAACCTTTTATTGAGACAGTTCCTTCCATAGATGCATTGCATTGTGACATCGGCAATGCGGCTGAGTTCTACAAGATATTCCAGTTTGAGATAGGTGAGGTGTACAAGAATCCTAACACATCTAAAGAAGAGAGGAAGAGGTGGCAGTCAACTCTTGACAAGCACCTCAGGAAGAAGATGAACCTGAAGCCCATAATGAGGATGAATGGAAACTTTGCTAGAAAGCTTATGACCAAAGAGACAGTGGAAGCAGTCTGTGAATTAATAACGGGTGAGGAAAGGCATGAAGCCCTAAGAGAACTGATGGATCTTTACCTTAAGATGAAACCAGTGTGGAGGTCTTCATGCCCAGCCAAAGAGTGCCCAGAATTGTTGTGTCAGTATAGCTTCAACTCACAACGTTTTGCTGAGCTCCTGTCCACAAAGTTCAAGTACAGATATGAGGGCAAGATTACAAATTACTTTCACAAAACTCTTGCTCATGTTCCTGAAATCATTGAAAGAGATGGCTCCATTGGGGCCTGGGCAAGTGAAGGGAATGAGTCTGGGAACAAATTGTTTAGGCGTTTC??????????????????????????????????????????????????????????????????????????????????????????????????????????????????????????????????????????????????????????????????????????????????????????????????????????????????????????????????????????????????????????????????????????????????????????????????????????????????????????????????????????????????????????????????????????????AGTCATACTTCTTTGCATATTTGTAATGTTTTATTTAAATAGGGTG-AGAATGTGTGTGATATTAATTGAAACAGAGATGCACGCTAGTTATCCAGCAGTTATGAACAGCATAAATCATATCCATGAAAGTCATTTCAAACAGATCTATGTTTCAGTGTATGTATTTATCTGGCTTTCAGCAGGATTGATATATTCATAAAAATCATTGCATTTTAAAAATGAAAAGCCAGATTCATCATTGTTGTTCCAGTTTTACATCAGTGTAACTCCACTGAACCCAGCATAGAGTTAGGCTAGTGATAGGGGTGAACCAGATCCAATGTTTTGTGTTTCAAGCAATCTGGTAGGCATTAGGTTGACTCTATGAGATCTGTGGGTTTTACTAAGGCAGATTTTTTTCC-TTCATCCTCACAGTTCTGAGACACACCCTTTGCCAGTCATCTTTGGGTAAGAAACTGAAGCTTGACTGAGAAGTGAAGAAGAATGTTTATATCTTTGTCATTATTGAAGCATTGCTAC---ATTTTGGTGCAATGTATGGAAAGGATAAATATAACAAAGGACACTTACAAGTGAGTCCTTTNCTGGGCACGTGAACATGTTGGGAATTGTCCAAGGTCATTTTTGTCCTATGGATGTGTCTGGAGTCAGCCTCTCAGCTCCTTTCCATGAAGAATGAGAATTATAATGCATGTGAAGTCCAGTCCTGCCTGGAACTGAGTGCCCTC-AAACCCCATTGACTTTGGGAGTTGCAGATGCTCAGCATCTC--ACCGGATTGGCTCAATGGTCACCTAAGAATTGTTTAGAATCGGAGCTGCTTCTTTGGCAGACCTCATGCATCCATATTTATCATTTCATTTGCAGCATAAGGCATTCTGAGAAGTACAGAGAGAGTGGG--AAAGGGACTATAT-GAGGACATTTGTCTTCTAGCATCTGTCAAAGTCACAAAGCTTAACAGGAATCAATGAAAATCTGTGACTTCTATTTTTGTCATATTAAAAGTGTGATGTTTTTGTTATTCCTNGAAATATATTATGTGACTGAAGTGATTTAATTTCTTAATTTTCTGTCTTTCAGATACAGATGGCTATCCAGCACATAG
Elseya_novaeguineae		??????????????????????????????????????????????????ACAAACCAAACGTTTGAAACTCAAAGGACTTGGCGG-TGCCCCAAA-CCCACCTAGAGGAGCCTGTTCTATAATCGATAATCCACGATATACCTCACCACCTCTCGCCC-AC-AGCCTATATACCTCCGTCCACAGCTTACCCTACTAAGGAAC-AAAAGTAAGCACAACAGTTCA-CACAA--CTAATAAGTCAGGTCAAGGTGTAGCCAACTGAGATGGAAGAAATGGGCTACATTTTCTACAC--TAGAAATA---TTAA-C---GGAAAGAGCCCTGAA??????????????????????????????????????????????????????????????????????????????????????????????????????????????????????????????????????????????????????????????????????????????????????????????????AAAGACTGGAATGAATGGCTAAACGAG-GTTCTATCTGTCTCTTACAAA-TAATCAGTGAAATTGATCTCCTCGTGCAAAAGCGAGAATATCCACATAAGACGAGAAGACCCTGTGGAACTTTAAGT--ATAAGTCACAATAATCAATCAACT-------ATTCAACAGAA-GACACC--TTATAATACAC-CTGACTTAAAACTTTCGGTTGGGGCGACCTCGGAGAACAATAAAACCTCCGAAA--ATTAC----------TACTAAGATAACACAAACCTAAGTGTC-TACGACA--AAACGATCCAATATACATGATCAACGAACCAAGCTACCCCAGGGATAACAGCGCAATCCCCTCTTAGAGT-CCATATCAATGACGGGGGT?????????????????????????????????????????????????????????TTTATCTAATCTTTGGGGCCTGAGCAGGAATAATCGGAACAGCTCTTAGCCTATTAATTCGAACAGAGTTAAGTCAACCAGGACCCCTACTAGGAGACGACCAAGTGTACAATGTAATTGTTACAGCCCACGCCTTCATCATAATCTTTTTTATAGTTATACCAATTATAATCGGTGGATTTGGAAACTGATTAGTTCCAATAATAATCGGATCGCCAGACATAGCATTTCCACGTATAAATAACATAAGCTTTTGACTTCTACCACCATCACTACTACTACTCCTAGCCTCCTCCGGCATTGAAGCTGGGGCTGGAACAGGATGAACTGTTTACCCCCCTTTAGCAGGCAACATAGCCCACGCTGGAGCTTCTGTAGACCTAACCATCTTCTCCCTACACTTAGCAGGGGCATCTTCAATTTTAGGGGCTATCAACTTCATCACCACTGCAATCAATATGAAAACCCCATCAATATCACAATACCAAACACCACTTTTCGTATGATCCGTACTTATCACAGCTGTATTACTACTACTCTCCCTTCCAGTACTAGCCGCAGGCATTACAATACTTTTAACAGACCGAAACCTTAATACAACCTTCTTTGATCCATCTGGTGGAGGAGACCCTATTCTATACCAACACCTA??????????????????????????????ATCGCCGGATCAATAATCCTTGCTGGTGTACTACTAAAACTGGGCGGATACGGCATTATCCGAATATCATTAATCATAGACCCA-CCACTAAAAAACCCATATCACCCATTCATGATACTAGCACTATGAGGAATCATCATAACCAGCCTAATCTGCCTACGACAAACCGACTTAAAATCACTAATCGCCTATTCATCTGTAAGCCACATGGGACTTGTTATCGCCTCTACACTTGTGCAAACCCAATGAGCACTCACAGGAGCTATCACCCTTATAATTGCCCACGGTTTAACATCATCTATATTATTCTGCCTATCAAACACAAACTACGAACGAACGAACAGCCGAATTCTAATCCTAACACGTAACATACAACTTCTACTCCCACTCATAACCCTATGATGACTTTCTGCCTGCCTTACCAACATAGCCCTACCCCCAACTATCAACCTCATAGGAGAACTATCCATTATTACCTCACTGTTCAACTGGTCAAATACTACTATCTTAATCACAGGATTAGGAACCATCCTAACAGCTACATATACACTCTACATATTCTCAGCCACTCAACTAGGAGGTGAATCACCATCAAAC---ATCTTAACCATTCCCCCAACCCAAACACGAGAACACCTAATCATAACACTACATATTCTACCCATAATCTTACTCATAATAAAACCACAACTAATCTCAAATGTATTATGTTAATATAGTTTTAATACAAACATTAGACTGTGGATCTAAAAATAGGAG?????????????????????????????????????????????????????????????????????????????????????????????????????????????????????????????????????????????????????????????????????????????????????????????????????????????????????????????????????????????????????????????????????????????????????????????????????????????????????????????????????????????????????????????????????????????????????????????????TATTACCATGAGGACAGATATCATTCTGAGGGGCTACAGTAATCACCAACCTCCTATCAGCTATTCCATACATAGGCCCCACACTTGTAGAATGAGTCTGAGGGGGATTCTCCGTAGACAACGCTACTCTAACCCGATTCTTCACATTCCACTTTCTAATCCCATTCGCCATCCTAGGAATAACAATACTACACCTCCTACTCCTACACGAAACAGGATCAAACAACCCAACAGGATTAAACTCAAACTGCGACAAAATCCCATTCCACCCCTACTTCTCCTATAAAGACCTACTCGGCCTCATTCTAATGATCACATGCCTACTCACTCTAGCCCTATTCTACCCAAACCTACTAGGAGACCCAGACAATTTCACACCAGCAAACCCACTAATCACCCCACCCCACATCAAACCAGAATGATACTTCCTATTCGCCTATGCAATCCTACGCTCAATCCCCAATAAACTAGGCGGTGTTATAGCACTATTCATATCCATTCTAGTGCTACTACTCATACCAATACT????????????????????????????????????????????????????????????????????????????????????????????????????????????????????????????????????????????????????????????????????????????????????????????????????????????????????????????????????????????????????????????????????????????????????????????????????????????????????????????????????????????????????????????????????????????????????????????????????????????????????????????????????????????????????????????????????????????????????????????????????????????????????????????????????????????????????????????????????????????????????????????????????????????????????????????????????????????????????????????????????????????????????????????????????????????????????????????????????????????????????????????????????????????????????????????????????????????????????????????????????????????????????????????????????????????????????????????????????????????????????????????????????????????????????????????????????????????????????????????????????????????????????????????????????????????????????????????????????????????????????????????????????????????????????????????????????????????????????????????????????????????????????????????????????????????????????????????????????????????????????????????????????????????????????????????????????????????????????????????????????????????????????????????????????????????????????????????????????????????????????????????????????????????????????????????????????????????????????????????????????????????????????????????????????????????????????????????????????????????????????????????????????????????????????????????????????????????????????????????????????????????????????????????????????????????????????????????????????????????????????????????????????????????????????????????????????????????????????????????????????????????????????????????????????????????????????????????????????????????????????????????????????????????????????????????????????????????????????????????????????????????????????????????????????????????????????????????????????????????????????????????????????????????????????????????????????????????????????????????????????????????????????????????????????????????????????????????????????????????????????????????????????????????????????????????????????????????????????????????????????????????????????????????????????????????????????????????????????????????????????????????????????????????????????????????????????????????????????????????????????????????????????????????????????????????????????????????????????????????????????????????????????????????????????????????????????????????????????????????????????????????????????????????????????????????????????????????????????????????????????????????????????????????????????????????????????????????????????????????????????????????????????????????????????????????????????????????????????????????????????????????????????????????????????????????????????????????????????????????????????????????????????????????????????????????????????????????????????????????????????????????????????????????????????????????????????????????????????????????????????????????????????????????????????????????????????????????????????????????????????????????????????????????????????????????????????????????????????????????????????????????????????????????????????????????????????????????????????????????????????????????????????????????????????????????????????????????????????????????????????????????????????????????????????????????????????????????????????????????????????????????????????????????????CCAGCAGTTATGAACAGCATAAATCATATCCATGAAAGTCATTTCAAACAGATCTATGTTTCAGTGTATGTATTTATCTGGCTTTCAGCAGGATTGATATATTCATAAAAATCATTGCATTTTAAAAATGAAAAGCCAGATTCATCATTGTTGTTCCAGTTTTACATCAGTGTAACTCCACTGAACCTAGCATAGAGTTAGGCTAGTGATAGGGGTGAACCAGATCCAATGTTTTGTGTTTCAAGCAATCTGGTAGGCATTAGGTTGACTCTATGAGATCTGTGGGTTTTACTAAGGCAGACTTTTTTCC-TTCATCCTCACAGTTCTGAGTCACGCCCTTTGCCAGTTATCTTTGGGTAAAAAACTGAAGCTTGACTGAGAAGTGAGGAAGAATGTTTATATCTTTGTA????????????????????????????????????????????????????????????????????????????????????????????????????????????????????????????????????????????????????????????????????????????????????????????????????????????????????????????????????????????????????????????????????????????????????????????????????????????????????????????????????????????????????????????????????????????????????????????????????????????????????????????????????????????????????????????????????????????????????????????????????????????????????????????????????????????????????????????????????????????????????????????????????????????????????????????????
Mesoclemmys_hogei		?????????????????????????????????????????????????????????????????????????????????????????????????????????????????????????????????????????????????????????????????????????????????????????????????????????????????????????????????????????????????????????????????????????????????????????????????????????????????????????????????????????????????????????????????????????????????????????????????????????????????????????????????????????????????????????AGGGGTGATGCCTGCCCAGTGACATTGTTCAACGGCCG-CGGTATTCTGACCGTGCGAAGGTAGCGTAATCACTTGTCTTTTAAATAAAGACTGGAATGAATGGCTAAACGAG-GCTCTATCTGTCTCTTACAGA-CAATCAGTGAAATTGATCTCCTCGTGCAAAAGCGAGAATAGTGATATAAGACGAGAAGACCCTGTGGAACTTTAAAT-AACAGCTAACGGCCAATAAACCTACT-----AAACCAACA-GG-ACCACTAACCATAACTATC-CCTAGCTTTA-TTTTCGGTTGGGGTGACCTCGGAGAAAAACAAAACCTCCGAAAA-CCTA-----------CACTAAGA-ACAACAAATCAAAGTG-CCTCCGGCT--AAACGATCCAATATATTTGATTAATGAACCAAGCTACCCCAGGGATAACAGCGCAATCCCCTCTTAGAGT-CCCTATCAACGACGGGGGTTTACGACCTCGATGTTGGATCAGGACATCCTAATGGTGCAGCCGCTATTAAGGGTTC?????????????????????????????????????????????????????????????????????????????????????????????????????????????????????????????????????????????????????????????????????????????????????????????????????????????????????????????????????????????????????????????????????????????????????????????????????????????????????????????????????????????????????????????????????????????????????????????????????????????????????????????????????????????????????????????????????????????????????????????????????????????????????????????????????????????????????????????????????????????????????????????????????????????????????????????????????????????????????????????????????????????????????????????????????????????????????????????????????????????????????????????????????????????????????????????????????????????????????????????????????????????????????????????????????????????????????????????????????????????????????????????????????????????????????????????????????????????????????????????????????????????????????????????????????????????????????????????????????????????????????????????????????????????????????????????????????????????????????????????????????????????????????????????????????????????????????????????????????????????????????????????????????????????????????????????????????????????????????????????????????????????????????????????????????????????????????????????????????????????????????????????????????????????????????????????????????????????????????????????????????????????????????????????????????????????????????????????????????????????????????????????????????????????????????????????????????????????????????????????????????????????????????????????????????????????????????????????????????????????????????????????????????????????????????????????????????????????????????????????????????????????????????????????????????????????????????????????????????????????????????????????????????????????????????????????????????????????????????????????????????????????????????????????????????????????????????????????????????????????????????????????????????????????????????????????????????????????????????????????????????????????????????????????????????????????????????????????????????????????????????????????????????????????????????????????????????????????????????????????????????????????????????????????????????????????????????????????????????????????????????????????????????????????????????????????????????????????????????????????????????????????????????????????????????????????????????????????????????????????????????????????????????????????????????????????????????????????????????????????????????????????????????????????????????????????????????????????????????????????????????????????????????????????????????????????????????????????????????????????????????????????????????????????????????????????????????????????????????????????????????????????????????????????????????????????????????????????????????????????????????????????????????????????????????????????????????????????????????????????????????????????????????????????????????????????????????????????????????????????????????????????????????????????????????????????????????????????????????????????????????????????????????????????????????????????????????????????????????????????????????????????????????????????????????????????????????????????????????????????????????????????????????????????????????????????????????????????????????????????????????????????????????????????????????????????????????????????????????????????????????????????????????????????????????????????????????????????????????????????????????????????????????????????????????????????????????????????????????????????????????????????????????????????????????????????????????????????????????????????????????????????????????????????????????????????????????????????????????????????????????????????????????????????????????????????????????????????????????????????????????????????????????????????????????????????????????????????????????????????????????????????????????????????????????????????????????????????????????????????????????????????????????????????????????????????????????????????????????????????????????????????????????????????????????????????????????????????????????????????????????????????????????????????????????????????????????????????????????????????????????????????????????????????????????????????????????????????????????????????????????????????????????????????????????????????????????????????????????????????????????????????????????????????????????????????????????????????????????????????????????????????????????????????????????????????????????????????????????????????????????????????????????????????????????????????????????????????????????????????????????????????????????????????????????????????????????????????????????????????????????????????????????????????????????????????????????????????????????????????????????????????????????????????????????????????????????????????????????????????????????????????????????????????????????????????????????????????????????????????????????????????????????????????????????????????????????????????????????????????????????????????????????????????????????????????????????????????????????????????????????????????????????????????????????????????????????????????????????????????????????????????????????????????????????????????????????????????????????????????????????????????????????????????????????????????????????????????????????????????????????????????????????????????????????????????????????????????????????????????????????????????????????????????????????????????????????????????????????????????????????????????????????????????????????????????????????????????????????????????????????????????????????????????????????????????????????????????????????????????????????????????????????????????????????????????????????????????????????????????????????????????????????????????????????????????????????????????????????????????????????????????????????????????????????????????????????????????????????????????????????????????????????????????????????????????????????????????????????????????????????????????????????????????????????????????????????????????????????????????????????????????????????????????????????????????????????????????????????????????????????????????????????????????????????????????????????????????????????????????????????????????????????????????????????????????????????????????????????????????????????????????????????????????????????????????????????????????????????????????????????????????????????????????????????????????????????????????????????????????????????????????????????????????????????????????????????????????????????????????????????????????????????????????????????????????????????????????????????????????????????????????????????????????????????????????????????????????????????????????????????????????????????????????????????????????????????????????????????????????????????????????????????????????????????????
Emydura_tanybaraga		???????????????????????????????????????????????????????????????????????????????????????????????????????????????????????????????????????????????????????????????????????????????????????????????????????????????????????????????????????????????????????????????????????????????????????????????????????????????????????????????????????????????????????????????????????????????????????????????????????????????????????????????????????????????????????????????????????????????????????????????????????????????????????????????????????????????????????????????????????????????????????????????????????????????????????????????????????????????????????????????????????????????????????????????????????????????????????????????????????????????????????????????????????????????????????????????????????????????????????????????????????????????????????????????????????????????????????????????????????????????????????????????????????????????????????????????????????????????????????????????????????????????????????????????????????????ATAATCGGAACAGCTCTTAGTCTACTAATTCGAACAGAATTAAGTCAACCAGGACCCCTACTAGGAGATGATCAAGTATACAATGTAATTGTCACAGCCCATGCTTTCATTATAATCTTTTTCATAGTTATACCTATTATAATTGGTGGATTTGGAAACTGATTAGTTCCAATAATAATTGGATCGCCAGATATAGCATTCCCACGGATGAATAATATAAGCTTTTGACTTCTACCCCCATCACTTCTACTTCTTCTAGCCTCCTCCGGTATCGAAGCTGGAGCGGGAACAGGATGAACTGTATATCCCCCTTTGGCTGGAAACATAGCTCACGCCGGAGCTTCTGTCGACCTAACTATCTTCTCCCTACACTTAGCCGGGGCATCCTCAATTTTAGGGGCTATTAACTTTATCACCACTGCGATTAATATAAAAACCCCATCAATATCCCAATATCAAACACCACTTTTCGTATGATCAGTACTTATCACAGCTGTATTACTACTACTATCCCTTCCTGTACTTGCTGCAGGAATTACAATACTTTTAACAGATCGAAATCTAAATACAACCTTCTTTGATCCATCTGGTGGAGGAGACCCAATTTTATACCAACATCTA?????????????????????????????????????????????????????????????????????????????????????????????????????????????????????????????????????????????????????????????????????????????????????????????????????????????????????????????????????????????????????????????????????????????????????????????????????????????????????????????????????????????????????????????????????????????????????????????????????????????????????????????????????????????????????????????????????????????????????????????????????????????????????????????????????????????????????????????????????????????????????????????????????????????????????????????????????????????????????????????????????????????????????????????????????????????????????????????????????????????????????????????????????????????????????????????????????????????????????????????????????????????????????????????????????????????????????????????????????????????????????????????????????????????????????????????????????????????????????????????????????????????????????????????????????????????????????????????????????????????????????????????????????????????????????????????????????????????????????????????????????????????????????????????????????????????????????????????????????????????????????????????????????????????????????????????????????????????????????????????????????????????????????????????????????????????????????????????????????????????????????????????????????????????????????????????????????????????????????????????????????????????????????????????????????????????????????????????????????????????????????????????????????????????????????????????????????????????????????????????????????????????????????????????????????????????????????????????????????????????????????????????????????????????????????????????????????????????????????????????????????????????????????????????????????????????????????????????????????????????????????????????????????????????????????????????????????????????????????????????????????????????????????????????????????????????????????????????????????????????????????????????????????????????????????????????????????????????????????????????????????????????????????????????????????????????????????????????????????????????????????????????????????????????????????????????????????????????????????????????????????????????????????????????????????????????????????????????????????????????????????????????????????????????????????????????????????????????????????????????????????????????????????????????????????????????????????????????????????????????????????????????????????????????????????????????????????????????????????????????????????????????????????????????????????????????????????????????????????????????????????????????????????????????????????????????????????????????????????????????????????????????????????????????????????????????????????????????????????????????????????????????????????????????????????????????????????????????????????????????????????????????????????????????????????????????????????????????????????????????????????????????????????????????????????????????????????????????????????????????????????????????????????????????????????????????????????????????????????????????????????????????????????????????????????????????????????????????????????????????????????????????????????????????????????????????????????????????????????????????????????????????????????????????????????????????????????????????????????????????????????????????????????????????????????????????????????????????????????????????????????????????????????????????????????????????????????????????????????????????????????????????????????????????????????????????????????????????????????????????????????????????????????????????????????????????????????????????????????????????????????????????????????????????????????????????????????????????????????????????????????????????????????????????????????????????????????????????????????????????????????????????????????????????????????????????????????????????????????????????????????????????????????????????????????????????????????????????????????????????????????????????????????????????????????????????????????????????????????????????????????????????????????????????????????????????????????????????????????????????????????????????????????????????????????????????????????????????????????????????????????????????????????????????????????????????????????????????????????????????????????????????????????????????????????????????????????????????????????????????????????????????????????????????????????????????????????????????????????????????????????????????????????????????????????????????????????????????????????????????????????????????????????????????????????????????????????????????????????????????????????????????????????????????????????????????????????????????????????????????????????????????????????????????????????????????????????????????????????????????????????????????????????????????????????????????????????????????????????????????????????????????????????????????????????????????????????????????????????????????????????????????????????????????????????????????????????????????????????????????????????????????????????????????????????????AGTCATACTTCTTTGCATATTTGTAATGCTTTATTTAAATAGGGAG-AGAGTGTGTGTGATATTAATTGAAACAGAGATGCACGCTAGTTATCCAGCAGTTATGAACAGCATAAATCATATCCATAAAAGTCATTTCAAACAGATCTATGTTTCAGTGTATGTATTTATCTGTCTTTCAGCAGGATTGATATATTCATAAAAATCATTGCATTTTAAAAATGAAAAGCCAGATTCATCATTGTTGTTCCAGTTTTACATCAGTGTAACTCCACTGAACCCAGCATAGAGTTAGGCTAGTGATAGGGGTGAACCAGATCCAATGTTTTGTGTTTCAAGCAATCTGGTAGGCATTAGGTTGACTCT--GAGATCTGTGGGTTTTACTAAGGCAGATTTTTTTCC-TTCATCCTCACAGTTCTGAGTCACGCCCTTTGCCAGTCATCTCTGGGTAAGAAACTGAAGCTTGATTGAGAAGTGAGGAAGAATGTTTATATCTTTGTAATTATTGAAGCATTGCTAC---ATTTTGGTGCAATGTATGGAAAGGATAAATATAACAAAGGACACGTACAAGTGAGTCCTTTGCTGGGCATGTGAACATGTTGGGAATTGTCCAAGGTCATTTTTGTCCTATGGATGTGTCTGGAGTCAGCCTCTCAGCTCCTTTCCATGAAGAATGAGAATTATAATGCATGTGAAGTCCAGTCCTGCCTGGAACTGAGTGGCCTC-AAACCCCATTGACTTTGGGAGTTGCAGATGCTCAGCATCTC--ACCGGATTGGCTCAATGGTCACCTAAGAATTGTTTAGAATTGGAGCTGCTTCTTTGGCAGACCTCATGCATCCATATTTATCATTTCATTTGCAGCATAAGGCATTCTGAGAAATACAGAGAGAGTGGG--AAAGGGACTATAT-GAGGACATTTGTCTTCTAGCATCTGTCAAAGTCACAAAGCTTAACAGGAATCAATGAAAATCTGTGACTTCTATTTCTGTCATATTAAAAGTGTGATGTTTTTGTTATTCCTGGAAATATATTATGTGACTGAAGTGATTTAATTTCTTAATGTTCTGTCTTTCAGATACAGATGGCTATCCAGCACATAG
Emydura_victoriae		????????????????????????????????????????????????????????????????????????????????????????????????????????????????????????????????????????????????????????????????????????????????????????????????????????????????????????????????????????????????????????????????????????????????????????????????????????????????????????????????????????????????????????????????????????????????????????????????????????????????????????????????????????????????????????????????????????????????ACTGTTTAACGGCCG-CGGTATCCTGACCGTGCGAAGGTAGCGTAATCACTCGTCTTTTAAATAAAGACTAGAATGAATGGCTAAACGAG-GTTCTATCTGTCTCTTACAAA-CAATCAGTGAAATTGATCCCCCCGTGCAAAAGCGAGGATAACCCCATAAGACGAGAAGACCCTGTGGAACTTTAAGT--ATGAGTCATCACCATTAACCAACT-------ACTCAACAGAA-AACACTACTAATAACCTTC-CTGACTTTTAACTTTCGGTTGGGGCGACCTCGGAGAAAAATAAAACCTCCGAAA--ATTAC----------TACTACGATAATACAAACCTAAGTGCC-CACGGTA--AAAAGATCCAATACACTTGATCAACGAACCAAGCTACCCCAGGGATAACAGCGCAATCCCCTCTTAGAGT-CCATATCAATGACGGGGGTTTACGACCTCGATGTTGGATCAGGACAC?????????????????????????????TTTACTTGATTTTCGGGGCCTGAGCAGGAATAATTGGAACAGCCCTTAGTCTATTAATTCGAACAGAACTAAGCCAACCAGGACCCTTACTAGGAGATGATCAAGTTTACAATGTAATTGTTACATCCCACGCCTTCATTATAATCTTTTTCATAGTCATACCCATTATAATTGGTGGATTTGGAAACTGATTAGTTCCAATAATAATCGGATCACCAGATATAGCATTTCCACGAATAAATAATATAAGCTTTTGACTTCTACCACCATCACTACTTCTACTTTTAGCCTCCTCTGGTATTGAAGCCGGAGCAGGAACAGGATGAACTGTATATCCACCCTTAGCTGGAAACATAGCCCACGCTGGAGCTTCTGTTGACCTAACTATCTTCTCCCTACACTTAGCCGGGGCATCCTCAATTTTAGGGGCTATCAACTTTATCACCACTGCAATTAATATAAAAACCCCATCAATATCACAATACCAAACACCACTTTTCGTATGATCAGTACTTATTACAGCTGTACTACTACTACTCTCCCTCCCAGTACTTGCCGCAGGCATTACAATACTTTTAACAGACCGAAACCTAAATACAACCTTCTTTGATCCATCTGGTGGAGGAGACCCAATCCTATATCAACATCTA?????????????????????????????????????????????ATCCTTGCCGGCGTCCTATTAAAACTAGGCGGATACGGCATTATCCGAGTATCACTTATTATAAGCCCC-CCCATAAAAAACCCATACTACCCATTCATAATACTAGCACTATGAGGAATTATCATAACTAGCTTAATCTGCCTACGTCAAACCGACCTAAAATCACTAATCGCCTATTCATCTGTAAGCCACATAGGACTCGTTATCGCCTCTACATTCGTACAATCCCAATGAGCACTTACAGGGGCCGTCACCCTAATAATTGCCCACGGTTTAACATCATCTATGCTATTCTGTCTATCAAACACAAACTACGAACGAACGAACAGCCGAATTTTAATCCTAACACGAAATATACAACTTCTACTCCCACTAATAACCCTATGATGACTTTCTGCCAGCCTAACTAATATAGCCCTACCACCAACCATTAACCTCATGGGGGAATTATCTATTATTGCTTCATTATTCAACTGATCAAATACTACCATCCTAGTCACAGGACTAGGCACAATCCTATCAGCTACATATACACTCTATATGTTCTCAACTACTCAACTAGGGGGTGAATCACCATCAAAC---ATCATAACCATCCCACCAACCCAAACACGAGAACACCTAATCATGGCACTACACATCCTGCCCATAATCCTACTCATAATAAAACCACAACTAATCTCAGGAATATTATGTTAATATAGTTTTAATACAAACATTAGACTGTGGATCTGAAAATAGGAG???????????????????????????????????????????????????????????????????????????????????????????????????????????????????????????????????????????????????????????????????????????????????????????????????????????????????????????????????????????????????????????????????????????????????????????????????????????????????????????????????????????????????????????????????????????????????????????????????????????????????????????????????????????????????????????????????????????????????????????????????????????????????????????????????????????????????????????????????????????????????????????????????????????????????????????????????????????????????????????????????????????????????????????????????????????????????????????????????????????????????????????????????????????????????????????????????????????????????????????????????????????????????????????????????????????????????????????????????????????????????????????????????????????????????????????????????????????????????????????????????????????????????????????????????????????????????????????????????????????????????????????????????????????????????????????????????????????????????????????????????????????????????????????????????????????????????????????????????????????????????????????????????????????????????????????????????????????????????????????????????????????????????????????????????????????????????????????????????????????????????????????????????????????????????????????????????????????????????????????????????????????????????????????????????????????????????????????????????????????????????????????????????????????????????????????????????????????????????????????????????????????????????????????????????????????????????????????????????????????????????????????????????????????????????????????????????????????????????????????????????????????????????????????????????????????????????????????????????????????????????????????????????????????????????????????????????????????????????????????????????????????????????????????????????????????????????????????????????????????????????????????????????????????????????????????????????????????????????????????????????????????????????????????????????????????????????????????????????????????????????????????????????????????????????????????????????????????????????????????????????????????????????????????????????????????????????????????????????????????????????????????????????????????????????????????????????????????????????????????????????????????????????????????????????????????????????????????????????????????????????????????????????????????????????????????????????????????????????????????????????????????????????????????????????????????????????????????????????????????????????????????????????????????????????????????????????????????????????????????????????????????????????????????????????????????????????????????????????????????????????????????????????????????????????????????????????????????????????????????????????????????????????????????????????????????????????????????????????????????????????????????????????????????????????????????????????????????????????????????????????????????????????????????????????????????????????????????????????????????????????????????????????????????????????????????????????????????????????????????????????????????????????????????????????????????????????????????????????????????????????????????????????????????????????????????????????????????????????????????????????????????????????????????????????????????????????????????????????????????????????????????????????????????????????????????????????????????????????????????????????????????????????????????????????????????????????????????????????????????????????????????????????????????????????????????????????????????????????????????????????????????????????????????????????????????????????????????????????????????????????????????????????????????????????????????????????????????????????????????????????????????????????????????????????????????????????????????????????????????????????????????????????????????????????????????????????????????????????????????????????????????????????????????????????????????????????????????????????????????????????????????????????????????????????????????????????????????????????????????????????????????????????????????????????????????????????????????????????????????????????????????????????????????????????????????????????AGTCATACTTCTTTGCATATTTGTAATGCTTTATTTAAATAGGGAG-AGAGTGTGTGTGATATTAATTGAAACAGAGATGCACGCTAGTTATCCAGCAGTTATGAACAGCATAAATCATATCCATAAAAGTCATTTCAAACAGATCTATGTTTCAGTGTATGTATTTATCTGTCTTTCAGCAGGATTGATATATTCATAAAAATCATTGCATTTTAAAAATGAAAAGCCAGATTCATCATTGTTGTTCCAGTTTTACATCAGTGTAACTCCACTGAACCCAGCATAGAGTTAGGCTAGTGATAGGGGTGAACCAGATCCAATGTTTTGTGTTTCAAGCAATCTGGTAGGCATTAGGTTGACTCT--GAGATCTGTGGGTTTTACTAAGGCAGATTTTTTTCC-TTCATCCTCACAGTTCTGAGTCACGCCCTTTGCCAGTCATCTCTGGGTAAGAAACTGAAGCTTGATTGAGAAGTGAGGAAGAATGTTTATATCTTTGTAATTATTGAAGCATTGCTAC---ATTTTGGTGCAATGTATGGAAAGGATAAATATAACAAAGGACACGTACAAGTGAGTCCTTTGCTGGGCATATGAACATGTTGGGAATTGTCCAAGGTCATTTTTGTCCTATGGATGTGTCTGGAGTCAGCCTCTCAGCTCCTTTCCATGAAGAATGAGAATTATAATGCATGTGAAGTCCAGTCCTGCCTGGAACTGAGTGGCCTC-AAACCCCATTGACTTTGGGAGTTGCAGATGCTCAGCATCTC--ACCGGATTGGCTCAATGGTCACCTAAGAATTGTTTAGAATTGGAGCTGCTTCTTTGGCAGACCTCATGCATCCATATTTATCATTTCATTTGCAGCATAAGGCATTCTGAGAAATACAGAGAGAGTGGG--AAAGGGACTATAT-GAGGACATTTGTCTTCTAGCATCTGTCAAAGTCACAAAGCTTAACAGGAATCAATGAAAATCTGTGACTTCTATTTCTGTCATATTAAAAGTGTGATGTTTTTGTTATTCCTGGAAATATATTATGTGACTGAAGTGATTTAATTTCTTAATGTTCTGTCTTTCAGATACAGATGGCTATCCAGCACATAG
Phrynops_williamsi		?????????????????????????????????????????????????????????????????????????????????????????????????????????????????????????????????????????????????????????????????????????????????????????????????????????????????????????????????????????????????????????????????????????????????????????????????????????????????????????????????????????????????????????????????????????????????????????????????????????????????????????????????????????????????????????????????????????????????????????CGGCCG-CGGTATTCTGGCCGTGCGA-GGTAGCATAATCACTTGTCTTTTAAATAGAGACTGGAATGAATGACTAAACGAG-GCTCTATCTGTCTCCTACAGG-CGATCAGTGAAATTGATCTCCTCGTGCAAAAGCGAGAATGGTAACATAAGACGAGAAGACCCTGTGGAACTTTAAAT-AACAGCTAATAACCA-TAAACCCACT-----AAACCGATA-GG-ACCACTA-CCATGACCACT-CTTAGCTCTA-TTTTCGGTTGGGGTGACCTCGGAGAAAAACGCAACCTCCGAAGA-CCTA-----------TACTAAGA-GCAACAAACCAAAGTG-CCTCCGGCT--AAACGATCCAATATATTTGATTGATGAACCAAGCTACCCCAGGGATAACAGCGCAATCCCCTCTTAGAGTGCCATATCAACGATGGGGGTTTACGACCTCGATGTTGGATCAGGACATCCTAATGGTGCAGCCG??????????????????????????????????????????????????????????????????????????????????????????????????????????????????????????????????????????????????????????????????????????????????????????????????????????????????????????????????????????????????????????????????????????????????????????????????????????????????????????????????????????????????????????????????????????????????????????????????????????????????????????????????????????????????????????????????????????????????????????????????????????????????????????????????????????????????????????????????????????????????????????????????????????????????????????????????????????????????????????????????????????????????????????????????????????????????????????????????????????????????????????????????????????????????????????????????????????????????????????????????????????????????????????????????????????????????????????????????????????????????????????????????????????????????????????????????????????????????????????????????????????????????????????????????????????????????????????????????????????????????????????????????????????????????????????????????????????????????????????????????????????????????????????????????????????????????????????????????????????????????????????????????????????????????????????????????????????????????????????????????????????????????????????????????????????????????????????????????????????????????????????????????????????????????????????????????????????????????????????????????????????????????????????????????????????????????????????????????????????????????????????????????????????????????????????????????????????????????????????????????????????????????????????????????????????????????????????????????????????????????????????????????????????????????????????????????????????????????????????????????????????????????????????????????????????????????????????????????????????????????????????????????????????????????????????????????????????????????????????????????????????????????????????????????????????????????????????????????????????????????????????????????????????????????????????????????????????????????????????????????????????????????????????????????????????????????????????????????????????????????????????????????????????????????????????????????????????????????????????????????????????????????????????????????????????????????????????????????????????????????????????????????????????????????????????????????????????????????????????????????????????????????????????????????????????????????????????????????????????????????????????????????????????????????????????????????????????????????????????????????????????????????????????????????????????????????????????????????????????????????????????????????????????????????????????????????????????????????????????????????????????????????????????????????????????????????????????????????????????????????????????????????????????????????????????????????????????????????????????????????????????????????????????????????????????????????????????????????????????????????????????????????????????????????????????????????????????????????????????????????????????????????????????????????????????????????????????????????????????????????????????????????????????????????????????????????????????????????????????????????????????????????????????????????????????????????????????????????????????????????????????????????????????????????????????????????????????????????????????????????????????????????????????????????????????????????????????????????????????????????????????????????????????????????????????????????????????????????????????????????????????????????????????????????????????????????????????????????????????????????????????????????????????????????????????????????????????????????????????????????????????????????????????????????????????????????????????????????????????????????????????????????????????????????????????????????????????????????????????????????????????????????????????????????????????????????????????????????????????????????????????????????????????????????????????????????????????????????????????????????????????????????????????????????????????????????????????????????????????????????????????????????????????????????????????????????????????????????????????????????????????????????????????????????????????????????????????????????????????????????????????????????????????????????????????????????????????????????????????????????????????????????????????????????????????????????????????????????????????????????????????????????????????????????????????????????????????????????????????????????????????????????????????????????????????????????????????????????????????????????????????????????????????????????????????????????????????????????????????????????????????????????????????????????????????????????????????????????????????????????????????????????????????????????????????????????????????????????????????????????????????????????????????????????????????????????????????????????????????????????????????????????????????????????????????????????????????????????????????????????????????????????????????????????????????????????????????????????????????????????????????????????????????????????????????????????????????????????????????????????????????????????????????????????????????????????????????????????????????????????????????????????????????????????????????????????????????????????????????????????????????????????????????????????????????????????????????????????????????????????????????????????????????????????????????????????????????????????????????????????????????????????????????????????????????????????????????????????????????????????????????????????????????????????????????????????????????????????????????????????????????????????????????????????????????????????????????????????????????????????????????????????????????????????????????????????????????????????????????????????????????????????????????????????????????????????????????????????????????????????????????????????????????????????????????????????????????????????????????????????????????????????????????????????????????????????????????????????????????????????????????????????????????????????????????????????????????????????????????????????????????????????????????????????????????????????????????????????????????????????????????????????????????????????????????????????????????????????????????????????????????????????????????????????????????????????????????????????????????????????????????????????????????????????????????????????????????????????????????????????????????????????????????????????????????????????????????????????????????????????????????????????????????????????????????????????????????????????????????????????????????????????????????????????????????????????????????????????????????????????????????????????????????????????????????????????????????????????????????????????????????????????????????????????????????????????????????????????????????????????????????????????????????????????????????????????????
Flaviemys_purvisi		CCCTAAACCT-AGATTTTTTT-AATATACAAA-AATCTGCCAGAGAA-CTACAAACTAAAAGTTTGAAACTCAAAGGACTTGGCGG-TGCCCCAAA-CCCACCTAGAGGAGCCTGTTCTATAATCGATAATCCACGATTCACCTCACCACCTCTCGCCC-ACCAGCCTATATACCTCCGTCCACAGCTTACCCTGCTAAGGAAT-AAAAGTAAGCACAATAGTTTA-TACAA--CTAATAAGTCAGGTCAAGGTGTAGCCAACTGAGGCGGAAGAAATGGGCTACATTTTCTACAC--TAGAAATA---TTTAAC---GGAAAGAACCTTGAAA--TATGGGCCT-AAAAGTAGGATTTAGCAGTAATGTG-AAAGCAGAGAGCCCACATTAACTC?????????????????????????????????????????????AGGAGTGATGCCTGGCCAGTGACAATGTTTAACGGYCG-CGGTACCCTGACCGTGCGAAGGTAGCGTAATCACTCGTCTTTTAAATAAAGACTAGAATGAATGGCTAAACGAG-GCTCTATCTGTCTCTTACAAA-TAATCAGTGAAATTGATCCCCTCGTGCAAAAGCGAGAATAACACCACAAGACGAGAAGACCCTGTGGAACTTTAAGT--GTAAGTCACCACCACTAACTAACT-------ACTCAATAGAG-AACACCAATTATAAACTAC-CTGACTCAAAACTTTCGGTTGGGGCGACCTCGGAGAACAACAAAACCTCCGAAA---TTAC----------TACTAAGATAGTACAAACCTAAGTGCC-TTCGGCA--AAACGATCCAATATACATGATCAACGAACCAAGCTACCCCAGGGATAACAGCGCAATCCCCTCTTAGAGT-CCATATCAATGATGGGGGTTTACGACCTCGATGTTGGATCAGGACATCCTAATGGTGCAWCCGCTAWTAAGGKTC?TTTACCTGATCTTCGGGGCCTGAGCAGGAATAATCGGAACAGCCCTTAGTCTATTAATTCGAACAGAATTAAGTCAACCAGGGCCTCTACTAGGAGACGATCAAGTATACAATGTTATCGTTACAGCCCATGCCTTTATTATAATCTTTTTTATAGTCATACCTATTATAATTGGTGGATTTGGAAACTGATTAGTCCCAATAATAATTGGATCACCAGACATAGCATTTCCACGTATAAACAATATAAGCTTTTGACTTCTACCACCATCACTACTACTACTTCTAGCCTCTTCCGGTGTTGAAGCCGGAGCTGGAACAGGATGAACTGTATACCCTCCTTTAGCCGGAAACATAGCCCACGCTGGAGCTTCTGTTGATCTAACTATCTTCTCCTTACATTTAGCCGGAGCATCCTCAATTCTAGGGGCTATCAACTTCATCACCACCGCAATTAATATAAAAACCCCATCAATATCACAATACCAAACACCACTCTTCGTATGATCAGTACTTATTACAGCTGTACTACTACTACTCTCCCTTCCAGTACTAGCCGCAGGAATTACAATACTGTTAACTGACCGAAACCTAAATACAACCTTCTTCGACCCATCTGGTGGAGGAGACCCAATCCTATACCAACACCTG??????????????????????????????ATCGCCGGATCAATAATCCTTGCTGGAGTACTATTAAAACTAGGAGGATATGGCATCATCCGTATATCACTAATCATAAATCCA-CCACTTAAAAACCCATACCACCCATTCATAATAATAGCACTATGAGGAATCATTATAACCAGCTTGATCTGCCTACGCCAGACAGACCTAAAATCACTAATCGCCTATTCATCTGTCAGCCATATAGGCCTTGTTATCGCCTCTACATTTGTACAAACCCAATGAGCACTTACCGGAGCCATCACCCTAATAGTTGCCCACGGCTTAACATCATCAATATTATTCTGCCTATCAAACACAAACTACGAACGAACAAACAGCCGAATTCTAATCCTCACACGTAACATACAACTACTACTTCCACTAATAACCCTATGGTGACTTTCAGCCAGCCTTACCAACATAGCCCTGCCCCCCACCATCAATCTTATAGGAGAATTATCCATTATTACTTCACTATTCAGCTGATCAAATACCACCATCTTAATTACAGGATTGGGCACCATCCTATCAGCTACATACACACTCTATATATTCTCAACTACCCAATTAGGAAATGAATTACCATCAAAC---ATCCTAACCATCCCACCAACCCAAACACGAGAACACCTTATCATAACACTACACATCCTACCTGCAGTTTTACTCATAATAAAACCGCAACTGATCTCCGGTATATTATGTTAATATAGTTTTAATACAAACATTAGACTGTGGATCTAAAAATAGGAG?TAAAAAACACAAACTCACTGTTAAAAATTATTAACAACTCCCTAATCAACCTCCCTACCCCATCCAATATCTCCGCTTCATGAAACTTCGGGTCATTATTAGGAGCATGTCTTGCTCTACAACTAGCCACAGGAATCTTCTTAGCCATACACTACTCACCTGATATCTCCATAGCATTCTCATCAATCTCCCATATCCAACGTGACGTCCAATACGGATGACTAATTCGAAACACACACGCCAACGGAGCTTCATTATTTTTCATATGCATCTACCTTCATATCGGACGAGGCATCTATTATGGCTCTTATCTATATAACAAAACATGAAACACCGGAGTAATATTACTATTCCTTGTTATAGCCACCGCATTCGTGGGCTACGTATTACCATGAGGACAAATATCTTTCTGAGGGGCTACAGTAATCACCAACCTCCTATCAGCTATCCCATACCTAGGCCCCACACTTGTAGAATGAATTTGAGGCGGATTTTCCGTAGATAATGCCACTTTAACCCGATTCTTTACATTCCACTTTCTAATCCCATTCATAATCTTAGGAATAACCATACTACACCTCCTTATATTACACGAAACAGGATCAAACAACCCAACAGGATTAAACTCAAACTGTGACAAAATCCCATTTCACCCATACTTCTCCTACAAAGACCTACTAGGCCTCCTCCTAATAATCACATGCCTACTCATACTAACCCTATTTTACCCAAATCTACTAGGAGACCCAGACAACTTCACACCAGCTAATCCACTAACCACT????????????????????????????????????????????????????????????????????????????????????????????????????????????????????????????????????????????????????????????????????????????????????????????????????????????????????????????????????????????????????????????????????????????????????????????????????????????????????????????????????????????????????????????????????????????????????????????????????????????????????????????????????????????????????????????????????????????????????????????????????????????????????????????????????????????????????????????????????????????????????????????????????????????????????????????????????????????????????????????????????????????????????????????????????????????????????????????????????????????????????????????????????????????????????????????????????????????????????????????????????????????????????????????????????????????????????????????????????????????????????????????????????????????????????????????????????????????????????????????????????????????????????????????????????????????????????????????????????????????????????????????????????????????????????????????????????????????????????????????????????????????????????????????????????????????????????????????????????????????????????????????????????????????????????????????????????????????????????????????????????????????????????????????????????????????????????????????????????????????????????????????????????????????????????????????????????????????????????????????????????????????????????????????????????????????????????????????????????????????????????????????????????????????????????????????????????????????????????????????????????????????????????????????????????????????????????????????????????????????????????????????????????????????????????????????????????????????????????????????????????????????????????????????????????????????????????????????????????????????????????????????????????????????????????????????????????????????????????????????????????????????????????????????????????????????????????????????????????????????????????????????????????????????????????????????????????????????????????????????????????????????????????????????????????????????????????????????????????????????????????????????????????????????????????????????????????????????????????????????????????????????????????????????????????????????????????????????????????????????????????????????????????????????????????????????????????????????????????????????????????????????????????????????????????????????????????????????????????????????????????????????????????????????????????????????????????????????????????????????????????????????????????????????????????????????????????????????????????????????????????????????????????????????????????????????????????????????????????????????????????????????????????????????????????????????????????????????????????????????????????????????????????????????????????????????????????????????????????????????????????????????????????????????????????????????????????????????????????????????????????????????????????????????????????????????????????????????????????????????????????????????????????????????????????????????????????????????????????????????????????????????????????????????????????????????????????????????????????????????????????????????????????????????????????????????????????????????????????????????????????????????????????????????????????????????????????????????????????????????????????????????????????????????????????????????????????????????????????????????????????????????????????????????????????????????????????????????????????AGTCATACTTCTTTGCATATTTGTAATCCTTTATTTAAATAGGGAG-AGAGTGTGTGTGATATTAATTGAAACAGAGATGCATGCTAGTTATCCAGCAGTTATGAACAGCATAAATCATATCCATAAAAATCATTTCAAACAGATCTATGTTTCAGTGTATGTATTTATCTGGCTTTCAGCAGGATTGATATATTCATAAAATTCATTGCATTTTAAAAATGAAAAGCCAGATTCATCATTGTTGTTCCAGTTTTACATCAGTGTAACTCCACTGAACCCAGCATAGAGTTAGGCTAGTGATAGGGGTGAACCAGATCCAATGTTTTGTGTTTCAAGCAATCTGGTAGGCATTAGGTTGACTCTATGAGATCTGTGGGTTTTACTAAGGCAGATTTTTTTCC-TTCATCCTCACAGTTCTGAGTCACGCCCTTTGCCAGTCATCTCTGGGTAAGAAACTGAAGCTTGACTGAGAAGTGAGGAAGAATGTTTATATCTTTGTAATTATTGAAGCATTGCTAC---ATTTTGGTGCAATGTATGGAAAGGGTAAATATAACAAAGGACACTTACAAGTGAGTCCTTTGCTGGGCACGTGAACATGTTGGGAATTGTCCAAGGTCATTTTTGTCCTATGGATGTGTCTGGAGTCAGCCTCTCAGCTCCTTTCCATGAAGAATGAGAATTATAATGCATGTGAAGTCCAGTCCTGCCTGGAACTGAGTGCCCTC-AAACCC--TTGACTTTGGGAGTTGCAGATGCTCAGCATCTC--ACCGGATTGGCTCAATGGTCACCTAAGAATTGTTTAGAATCGGAGCTGCTTCTTTGGCAGACCTCATGCATCAATATTTAGCATTTCATTTGCAGCATAAGGCATTCTGAGAAATACAGAGAGAGGGGG--AAAGGGACTTTAG-GAGGACATTTGTCTTCTAGCATCTGTCAAAGTCACAAAGCTTAACAGGAATCAATGAAAATCTGTGACTTCTATTTTTGTCATATTAAAAGTGTGATGTTTTTGTTATTCCTGGAAATATGTTATGTGACTGAAGTGATTTAATTTCTTAATGTTCTGTCTTTCAGATACAGATGGCTATCCAGCACATAG
Pseudemydura_umbrina		CCTTAAACCT-AGATTTTTT--TATATATAAA-AATTTACCAGAGAA-CTACAAACTAAACGTTTAAAATTCAAAGGACTTGGCGG-TACCTCAAA-CCCACCTAGAGGAGCCTGTTCTATAATCGATAACCCACGATTAACCTCACCACCCCTTGCCC-TC-AGCCTATATACCTCCGTCTACAGCTCACTCTACAANGAGAT-AAAAGTAAGCCAANCAATCTA-CATAA--TTAATAAGTCAGGTCAAGGTGTAGCCAA-TGGGGTGGAAGAAATGGGCTACATTTTCTAAAT--TAGAAATA---ACTAAC---GGAAAGAACCTTGAAA--TATGGGTCT-AAAAATAGGATTTAGCAGTAATGTG-TGAACAGAGAGCCCACATTAACCCGGACCTGA-GAT?????????????????????????????????AGGGGTGATGCCTGCCCAGTGACATTGTTTAAYGGCCG-CGGTATACTGACCGTGCAAAGGTAGCATAATCACTTGTCTTTTAAATAAAGACTAGAATGAATGGCTAAACGAG-GTTCTATCTGTCTCTTACAAA-CAATCAGTGAAATTGATCTTCTCGTGCAAAAGCGAGAATAACACCATAAGACGAGAAGACCCTGTGGAACTTTAAGT--ACAAGTCG--ACCATTAAAT------------CTTTCCTATA-AACTTTACCCCTAA-TTAC-TCGACTA-TTACTTTTGGTTGGGGTGACCTCGGAGAACAATAAACCCTCCGAAAA-TTTTT----------TACTGAGATACCACAAACCTAAGTGCT-TTCGGCA--AAGCGATCCAAAA-ACTTGATCAACGAACCAAGCTACCCCAGGGATAACAGCGCAATCCCCTCTTAGAGT-TCATATCAACGACGGGGGTTTACGACCTCGATGTTGGATCAGGACATCCTAATGGTGTAGYCGCTATTAAGGGTTCTTTACTTAATCTTCGGGGCCTGAGCAGGAATAATTGGAACCGCCCTCAGTTTATTAATTCGAGCAGAATTAAGTCAACCGGGTTCACTTATAGGCGACGACCAAGTATATAACGTTATCGTTACAGCCCATGCTTTTATTATAATCTTTTTTATAGTTATACCAGTTATAATTGGTGGATTTGGAAACTGATTAGTTCCAATAATAATCGGAGCGCCAGATATAGCATTTCCACGAATAAATAACATAAGCTTCTGACTACTTCCACCATCATTACTACTCCTTCTAGCCTCATCAGGAATTGAAGCGGGTGCTGGAACTGGTTGAACTGTATACCCACCACTAGCTGGAAGCATGGCCCATGCAGGAGCCTCTGTGGATCTAACCATCTTCTCCCTACATTTAGCCGGAGCCTCCTCAATTTTAGGGGCCATTAACTTTATTACAACTGCAATTAATATAAAAACCCCCTCAATATCACAATACCAAACACCACTTTTTGTATGATCCGTACTTATCACAGCCATTCTACTACTTCTATCCCTACCAGTACTTGCTGCAGGGATTACTATACTCCTTACTGACCGAAATCTAAATACAACCTTCTTCGACCCTTCCGGCGGAGGGGATCCAATCCTGTACCAACACTTA???????????????????????????????????????????????????????????????????????????????????????????????????????????????????????????????????????????????????????????????????????????????????????????????????????????????????????????????????????????????????????????????????????????????????????????????????????????????????????????????????????????????????????????????????????????????????????????????????????????????????????????????????????????????????????????????????????????????????????????????????????????????????????????????????????????????????????????????????????????????????????????????????????????????????????????????????????????????????????????????????????????????????????????????????????????????????????????????????????????????????????????????????????????????????????????????????????????????????????????????????????????????????????????????????????????????????????????????????????????????????????????????????????????????????????????????????????????????????????????????????????????????????????????????????????????????????????????????????????????????????????????????????????????????????????????????????????????????????????????????????????????????????????????????????????????????????????????????????????????????????????????????????????????????????????????????????????????????????????????????????????????????????????????????????????????????????????????????????????????????????????????????????????????????????????????????????????????????????????????????????????????????????????????????????????????????????????????????????????????????????????????????????????????????????????????????????????????????????????????????????????????????????????????????????????????????????????????????????????????????????????????????????????????????????????????????????????????????????????????????????????????????????????????????????????????????????????????????????????????????????????????????????????????????????????????????????????????????????????????????????????????????????????????????????????????????????????????????????????????????????????????????????????????????????????????????????????????????????????????????????????????????????????????????????????????????????????????????????????????????????????????????????????????????????????????????????????????????????????????????????????????????????????????????????????????????????????????????????????????????????????????????????????????????????????????????????????????????????????????????????????????????????????????????????????????????????????????????????????????????????????????????????????????????????????????????????????????????????????????????????????????????????????????????????????????????????????????????????????????????????????????????????????????????????????????????????????????????????????????????????????????????????????????????????????????????????????????????????????????????????????????????????????????????????????????????????????????????????????????????????????????????????????????????????????????????????????????????????????????????????????????????????????????????????????????????????????????????????????????????????????????????????????????????????????????????????????????????????????????????????????????????????????????????????????????????????????????????????????????????????????????????????????????????????????????????????????????????????????????????????????????????????????????????????????????????????????????????????????????????????????????????????????????????????????????????????????????????????????????????????????????????????????????????????????????????????????????????????????????????????????????????????????????????????????????????????????????????????????????????????????????????????????????????????????????????????????????????????????????????????????????????????????????????????????????????????????????????????????????????????????????????????????????????????????????????????????????????????????????????????????????????????????????????????????????????????????????????????????????????????????????????????????????????????????????????????????????????????????????????????????????????????????????????????????????????????????????????????????????????????????????????????????????????????????????????????????????????????????????????????????????????????????????????????????????????????????????????????????????????????????????????????????????????????????????????????????????????????????????????????????????????????????????????????????????????????????????????????????????????????????????????????????????????????????????????????????????????????????????????????????????????????????????????????????????????????????????????????????????????????????????????????????????????????????????????????????????????????????????????????????????????????????????????????????????????????????????????????????????????????????????????????????????????????????????????????????????????????????????????????????????????????????????????????????????????????????????????????????????????????????????????????????????????????????????????????????????????????????????????????????????????????????????????????????????????????????????????????????????????????????????????????????????????????????????????????????????????????????????????????????????????????????????????????????????????????????????????????????????????????????????????????????????????????????????????????????????????????????????????????????????????????????????????????????????????????????????????????????????????????????????????????????????????????????????????????????????????????????????????????????????????????????????????????????????????????????????????????????????????????????????????????????????????????????????????????????????????????????????????????????????????????????????????????????????????????????????????????????????????????????????????????????????????????????????????????????????????????????????????????????????????????????????????????????????????????????????????????????????????????????????????????????????????????????????????????????????????????????????????????????????????????????????????????????????????????????????????????????????????????????????????????????????????????????????????????????????????????????????????????????????????????????????????????????????????????????????????????????????????????????????????????????????????
Phrynops_geoffroanus		???????????????????????????????????TCCGCCAGAGAA-CTACCAACCACGCATTTGAAACTCAAAGGACTTGGCGG-TGTCTCAAA-TCCAACTAGAGGAGCCTGTTCTACAACCGATAATCCACGATTTACCTCACCACCCCTAGCCG-ATCAGCCTATATACCTCCGTCTTCAGCCTACCTTATGAAAGAAC-AAAAGTAAGCACAATAGTCAAAAAACA--CTAACAAGTCAGGTCAAGGTGTAGCCAA-TGGAGTGGAAGAAATGGGCTACATTTTCTACCA--TAGAAATAC-CCCTAAC---GGAACGGATCATGAAA--CAAGACCC-AGAAAGCAGGATTTAGTAGTAATGTA-AGAATAGAGAGCCTACATTAATTAGGACCTGA-GACGCGCACACACCGCCCGTCACCCTCATCAAAAA?????????????????????????????????CGGYCG-YGGTATTCTGACCGTGCGARGGTAGCGTAATCACTTGTCTTTTAAATAGAGACTGGAATGAATGACTAAACGAG-GCTCTATCTGTCTCCTACAGG-CGATCAGTGAAATTGATCTCYTCGTSCAAAAGCGAGAATGGTAACATAAGACGAGAAGACCCTGTGGAACTTTAAAT-AACAGCTAATAGCCA-TAAACCCACT-----AAACCGATA-GG-ACCACTA-CTATGACCACT-CTTAGCTCTA-TTTTCGGGTGGGGTGACCTCGGAGRAAAACGAAACCTCCGAAAA-CCTA-----------TACTAAGA-ACAACAAACCAAAGTG-CCTCCGGCT--AAWCGATCCAATATAWTTGRTTAATGAACCAAGCTACCCCAGGGATAACAGMGCAATCCCCTCTTAGAGT-CCATATCAAMGATGGGGGKTTYCGACCTCGATGTTGGGTCARRACATCCTA??????????????????????????????????????????????????????????????????????????????????????????????????????????????????????????????????????????????????????????????????????????????????????????????????????????????????????????????????????????????????????????????????????????????????????????????????????????????????????????????????????????????????????????????????????????????????????????????????????????????????????????????????????????????????????????????????????????????????????????????????????????????????????????????????????????????????????????????????????????????????????????????????????????????????????????????????????????????????????????????????????????????????????????????????????????????AGCTCATGTAGAAGCCCCAATTGCCGGATCAATAGTACTTGCCGGCGTACTGCTAAAACTAGGCGGATATGGCATCATCCGAATATCATCAATCATCACCCCA-CCATCCAAAGACCTATCCTACCCATTCATAATTCTGGCCCTATGAGGTATCATCATAACTAGCCTAATCTGCCTCCGACAAACAGACCTAAAATCACTAATCGCCTACTCATCAGTTAGCCACATAGGACTAGTAATCTCCGCTACACTCATCCAAACTCCATGAGCACTAGCTGGAGCCACCACCCTGATAGTCGCCCACGGCCTGACATCATCAATACTATTTTGCCTCTCCAACACAAACTACGAACGAACAAACAGCCGAGTCCTAATTATCACCCGAAACCTACAACTATTACTACCATTAATAGCCCTCTGATGACTATTCGCCAGCCTAACCAACATGGCCCTACCACCAACCATCAACTTAATAGGAGAACTACCTATTATCACTTCCCTATTCAACTGATCCAAAATCACAATCTTAATCACAGGACTAGGCACCGTAATCTCTGCCGCCTACACACTATACATATTCTCATCTTCACAATGAGGGGGAGAATTTCCATCAAAC---ATTAAAACCATCCCTCCCACCCACACACGAGAACACCTAGTAATAATTCTCCACCTGCTACCAATAGTCCTACTAATAATAAAACCCCAACTAATCTCAAATATGTTTTGTCAATATAGTTTTAAACCAAACATTAGATTGTGAATCTAAGAATAGAAG????????????????????????????????????????????????????????????ACATCCAACATCTCAGCATGATGAAACTTCGGCTCCCTACTAGGAGCATGCCTTGCGCTACAATTAGCCACAGGAGTTTTCCTAGCCATACACTACTCATCTGATATCTCCACAGCATTCTCATCAATCTCCCACATCCAACGAGATGTCCAATATGGCTGACTAATCCGAAACATACATGCAAACGGGGCCTCACTATTTTTCATTTGCATGTACTTGCACATCGGACGAGGAATCTACTACGGATCATACCTGTACAAAAAAACCTGAAATACAGGAGTAGTACTACTCCTTCTAGTCATAGCTACCGCATTCGTTGGCTATGTACTGCCATGAGGACAAATATCATTCTGAGGGGCTACAGTAATCACCAACCTCCTATCAGCCCTCCCCTACATTGGGCACTCCACAGTAGAGTGGATCTGAGGTGGATTCTCCGTAGACAACGCCACCCTGACCCGATTCTTTACATTTCACTTCCTCATCCCATTCATCATCGCAGGCATAATAATAGTACACCTTTTATTCCTACACGAAACAGGCTCAAATAATCCCACAGGACTAAACTCCAACTGCGACAAAATCCCATTCCACCCATACTTCTCCCACAAAGACCTCCTAGGACTCATTATAATACTAACCTGCCTACTAAGCCTAACCCTATTCCTACCAAACCTACTAGGCGACCCAGACAACTTCACCCCAGCCAACCCGCTTGTCACCCCACCACACATCAAACCAGAATGGTACTTCCTATTCGCCTACGCCATCCTACGATCCATCCCCAACAAGCTCGGAGGCGTCCTAGCCCTCCTACTATCAATCATAGTCCTACTTCTAATACCCTCCCTCCACACATCAAAACAACGAACCACCACATTCCGACCAATATCCCAAATCACATTCTGACTCCTAGTAGCAGACCTACTCATCCTAACATGAATTGGGGGCCGACCAGTAGAAGACCCGTTCATCCTCATCGGACAAGTAGCCTCCACATTATACTTCTCAACCATCCTTATCATCATACCACTCACAAACCTAACTGAAAATAA--AATAATAAACT?????????????????????????????????????????????????????????????????????????????????????????????????????????????????????????????????????????????????????????????????????????????????????????????????????????????????????????????????????????????????????????????????????????????????????????????????????????????????????????????????????????????????????????????????????????????????????????????????????????????????????????????????????????????????????????????????????????????????????????????????????????????????????????????????????????????????????????????????????????????????????????????????????????????????????????????????????????????????????????????????????????????????????????????????????????????????????????????????????????????????????????????????????????????????????????????????????????????????????????????????????????????????????????????????????????????????????????????????????????????????????????????????????????????????????????????????????????????????????????????????????????????????????????????????????????????????????????????????????????????????????????????????????????????????????????????????????????????????????????????????????????????????????????????????????????????????????????????????????????????????????????????????????????????????????????????????????????????????????????????????????????????????????????????????????????????????????????????????????????????????????????????????????????????????????????????????????????????????????????????????????????????????????????????????????????????????????????????????????????????????????????????????????????????????????????????????????????????????????????????????????????????????????????????????????????????????????????????????????????????????????????????????????????????????????????????????????????????????????????????????????????????????????????????????????????????????????????????????????????????????????????????????????????????????????????????????????????????????????????????????????????????????????????????????????????????????????????????????????????????????????????????????????????????????????????????????????????????????????????????????????????????????????????????????????????????????????????????????????????????????????????????????????????????????????????????????????????????????????????????????????????????????????????????????????????????????????????????????????????????????????????????????????????????????????????????????????????????????????????????????????????????????????????????????????????????????????????????????????????????????????????????????????????????????????????????????????????????????????????????????????????????????????????????????????????????????????????????????????????????????????????????????????????????????????????????????????????????????????????????????????????????????????????????????????????????????????????????????????????????TGCAGCAAGAACCGGCTGGCATCGCGACAAAGCTTCTGGGCTGAGCTGAATGTGGCCCGGCTACACCATCCCAATGTGGTACGTGTTGTAGCTGCCAGCACTTGTGCCCCTGCCAACCAAGACAGCCTGGGCACCATAATCATGGAATATGCTGGCTGCACTACCCTGCACCATGTCATCTATTGCACTGGTTGCCTGCAGGGAAAGGGAGAGGATGACGGGGGTGGACATGGCAAGGAACCCTTAAGCGTTGCTGAATCCCTGGGTTATTCCTCTGATATTGTGACTGGCTTAGTCTTCCTCCACTCACAGTGCGTTGTGCACCTGGACCTGAAGCCTGCTAATGTAT-CATCACCGA-CAG?????????????????????????????????????????????????????????????????????TTGAAGCAGAGATGCACGCTAGTTATATAGCAGTTATGAACAGCATAAATCATATCCATAAAAGTCATTTCAAACAGATCTGTGTTTCAGTGAATGTATTTATCTGGCTTTCAGCAGGATTGAAATAGTCATAAAAATCATTGCATTTTAAAAATGAAAAGCCAGATTCATCATTGTAGTTCCAGTTTTACATTAGCGTAACTCCACTGAACCCAGCATAGAGTTAGGCTAGTGATAGGGGTGAATCGGATCCAATGTTTTGTGTTTCAAGCAATCTGGCAGGCATTAGATTGACTCTGAGAGATCTGTGAGTTTTACTAAGGCAGATTTTTTTCC-TCCATCCTCACAGTTCTGAGTCACACCCTTTGCCAGTCATCTCTGGGTAAGAAACTGAAGCTTGTCTGAGAAGTGAGGAAGAATGTTTATATCTTTGTAATTATTGAAGCATTACTAC---ATTTTGGTGCAATGTATGGAAAGGATTAATATAACAAAGGATACTTACAAGTGAGTCCTTTGCTGGGCACGTGAACGTGTTGGGAATTGTTAAGGGTCATTTTTGTCCTACGGATGTGTCTGGAGTCAGCCTTTCAGCTCCTTTCCATGAAGAATGAGAATTATAATGCATATGAAGCCCGGTCCTGCCTGGCACTGAGTGCCCTC-AAACCCCATTGACTTTGGGAGTCGCAGATGTTCAGCATCTC--ACCGGATTGGCTCAATGGTCGCCTAAGAATTGTTTAGAATCAGAGCTGCTTCTTTGGCAGACCTCATGCATCAATATTTATCATTTCGTTTGCAGCATNAGGCATTCTGAGAAATACAGAGAGAGGGGG--AAAGGGACTGTAT-GAGGACATTTGTCTTCTAGCATCTGTCAAAGTCACAAAGCTTAACAGGAATCAATGAAAATCTGTGACTTCTATTTTTGTCATATTAAAAGTGTGAAGTTTTTGTTATTCCTGGAAATATATTATGTGACTGAAGTGATTTAATTTCTTAA????????????????????????????????????????
Elseya_lavarackorum		????????????????????????????????????????????????????????????????????????????????????????????????????????????????????????????????????????????????????????????????????????????????????????????????????????????????????????????????????????????????????????????????????????????????????????????????????????????????????????????????????????????????????????????????????????????????????????????????????????????????????????????????????????????????????????????????????????????????ACTGTTTAACGGCCG-CGGTATCCTGACCGTGCGAAGGTAGCATAATCACTCGTCTTTTAAATAAAGACTGGAATGAATGGCTAAACGAG-GTTCTATCTGTCTCTTACAAA-CAATCAGTGAAATTGATCTCCCCGTGCAAAAGCGAGAATAACCACATAAGACGAGAAGACCCTGTGGAACTTTAAGT--ATAGGTCACAATCATAAACCAAAC-------ATTCAACAGAA-AACACC--TTACAACACAC-CTGACTTAAAACTTTCGGTTGGGGCGACCTCGGAGAACAAAAAAACCTCCGAAA--ATTAC----------TACCAAGATAACACAAACCTAAGTGTC-TACGACA--AAACGATCCAATATACATGATCAACGAACCAAGCTACCCCAGGGATAACAGCGCAATCCCCTCTTAGAGT-CCATATCAATGACGGGGGTTTACGACCTCGATGTTGGATCAGGACAC?????????????????????????????TTTATCTAATTTTTGGGGCCTGAGCAGGAATAATCGGAACAGCTCTTAGTCTATTAATTCGAACAGAATTAAGTCAACCAGGACCTCTACTAGGAGACGATCAGGTGTACAATGTAATTGTTACAGCCCATGCCTTCATCATAATCTTTTTTATAGTCATACCAATTATAATCGGTGGATTTGGAAACTGATTAGTCCCAATAATAATCGGATCACCAGACATAGCATTTCCACGTATAAATAACATAAGCTTCTGACTTCTACCCCCATCACTACTACTACTCCTAGCCTCATCCGGCATTGAAGCCGGGGCTGGAACAGGATGAACTGTTTACCCCCCTTTAGCAGGCAACATAGCCCACGCTGGGGCTTCTGTAGACCTAACCATCTTCTCCCTACACTTAGCCGGGGCATCTTCAATTTTAGGAGCTATCAACTTCATCACCACTGCAATCAATATAAAAACCCCATCAATATCACAATACCAAACACCACTTTTCGTATGGTCCGTACTTATCACAGCTGTATTACTACTACTTTCTCTTCCAGTACTAGCTGCAGGCATTACAATACTCTTAACAGACCGAAACCTAAATACAACCTTCTTTGATCCATCTGGTGGAGGAGACCCAATTCTGTACCAACACCTA???????????????????????????????????????????????????????????????????????????????????????????????????????????????????????????????????????????????????????????????????????????????????????????????????????????????????????????????????????????????????????????????????????????????????????????????????????????????????????????????????????????????????????????????????????????????????????????????????????????????????????????????????????????????????????????????????????????????????????????????????????????????????????????????????????????????????????????????????????????????????????????????????????????????????????????????????????????????????????????????????????????????????????????????????????????????????????????????????????????????????????????????????????????????????????????????????????????????????????????????????????????????????????????????????????????????????????????????????????????????????????????????????????????????????????????????????????????????????????????????????????????????????????????????????????????????????????????????????????????????????????????????????????????????????????????????????????????????????????????????????????????????????????????????????????????????????????????????????????????????????????????????????????????????????????????????????????????????????????????????????????????????????????????????????????????????????????????????????????????????????????????????????????????????????????????????????????????????????????????????????????????????????????????????????????????????????????????????????????????????????????????????????????????????????????????????????????????????????????????????????????????????????????????????????????????????????????????????????????????????????????????????????????????????????????????????????????????????????????????????????????????????????????????????????????????????????????????????????????????????????????????????????????????????????????????????????????????????????????????????????????????????????????????????????????????????????????????????????????????????????????????????????????????????????????????????????????????????????????????????????????????????????????????????????????????????????????????????????????????????????????????????????????????????????????????????????????????????????????????????????????????????????????????????????????????????????????????????????????????????????????????????????????????????????????????????????????????????????????????????????????????????????????????????????????????????????????????????????????????????????????????????????????????????????????????????????????????????????????????????????????????????????????????????????????????????????????????????????????????????????????????????????????????????????????????????????????????????????????????????????????????????????????????????????????????????????????????????????????????????????????????????????????????????????????????????????????????????????????????????????????????????????????????????????????????????????????????????????????????????????????????????????????????????????????????????????????????????????????????????????????????????????????????????????????????????????????????????????????????????????????????????????????????????????????????????????????????????????????????????????????????????????????????????????????????????????????????????????????????????????????????????????????????????????????????????????????????????????????????????????????????????????????????????????????????????????????????????????????????????????????????????????????????????????????????????????????????????????????????????????????????????????????????????????????????????????????????????????????????????????????????????????????????????????????????????????????????????????????????????????????????????????????????????????????????????????????????????????????????????????????????????????????????????????????????????????????????????????????????????????????????????????????????????????????????????????????????????????????????????????????????????????????????????????????????????????????????????????????????????????????????????????????????????????????????????????????????????????????????????????????????????????????????????????????????????????????????????????????????????????????????????????????????????????????????????????????????????????????????????????????????????????????????????????????????????????????????????????????????????????????????????????????????????????????????????????????????????????????????????????????????????????????????????????????????????????????????????????????????????????????????????????????????????????????????????????????????????????????????????????????????????????????????????????????????????????????????????????????????????????????????????????????????????????????????????????????????????????????????????????????????????????????????????????????????????????????????????????????????????????????????????????????????????????????????????????????????????????????????????????????????????????????????????????????????????????????????????????????????????????????????????????????????????????????????????????????????????????????????????????????????????????????????????????????????????????????????????????????????????????????????????????????????????????????????????????????????????????????????????????????????????????????????????????????????????????????????????????????????????????????????????????????????????????????????????????????????????????????????????????????????????????????????????????????????????????????????????????????????????????????????????????????????????????????????????????????????????????????????????????????????????????????????????????????????????????????????????????????????????????????????????????????????????????????????????????????????????????????????????????????????????????????????????????????????????????????????????????????????????????????????????????????????????????????????????????????????????????????????????????????????????????????????????????????????????????????????????????????????????????????????????????????????????????????????????????????????????????????????????????????????????????????????????????????????????????????????????????????????????????????????????????????????????????????????????????????????????????????????????????????????????????????????????
Hydromedusa_tectifera		CCCTAAACCA-AGATTTTTAA-CATACATAAA-GGTCCGCCAGAGAAACTACCAATCAAACATTTGAAACTCAAGGGACTTGACGG-TGTCTCAA--CCCACCTAGAGGAGCCTGTTCTATAATCGATAATCCACGATTCACCTCACCATCTCTTGCCC-TC-AGCCTATATACCTCCGTCTACAGTTTACCTTATGAAAGTAT-AAAAGTAAACACAATAGTTAA-CACAAAACTAATAAGTCAGGTCAAGGTGTAGCCTATTGAGATGGAAGAAATGGGCTACATTTTCTACTA--TAGAAATA---TTTAAC---GGAAAACCCCTTGAAATTTATGGGTTTATAAAGCAGGATTTAGTAGTAATGTA-AGAACAGAGAGCCTACATTAACCAGGATCTGA-GAC???????????????????????????????????????????????????????CAATKTTAAATGGCCG-CGGTATCCTGACCGTGCGAAAGTAGCGTAATCACTCGTCTTTTAAATAAAGACTAGAATGAATGGCTAAACGAG-GTCCTACCTGTCTCTTACAAA-CAATCAGTGAAATTGATCCCYTCGTGWRAAAGCGAGRATAATAACATAAGACGAGAAGACCCCGTGGRATTTTAAAT-WCGGTTTAACCAMTAKTAAATTTAT-------ACCCAA---GG-AAAWATTACCATTATTGAG-TTTAACCCTA-CTTTKGGTTGGGGTGACYTCGGAGAACAAAAAAACCTCCGAAAA-C-TAC----------TACCAAGATATAACAAACCTAAGTG-TCTTCGACM--AAWCGATCCAAYATATTTGATCAACGAACCAAACTACCCCGGGGATAACAGCRCAATCCCCTCTTAGAGT-CCCTATCGACGATGGGGGTTTACGACCTCGATGTTGGATCAGGAMATCCTAATGGTG?????????????????????????????????????????????????????????????????????????????????????????????????????????????????????????????????????????????????????????????????????????????????????????????????????????????????????????????????????????????????????????????????????????????????????????????????????????????????????????????????????????????????????????????????????????????????????????????????????????????????????????????????????????????????????????????????????????????????????????????????????????????????????????????????????????????????????????????????????????????????????????????????????????????????????????????????????????????????????????????????????????????????????????????????????????????????????????????????????????????????????????????????????????????????????????????????????????????????????????????????????????????????????????????????????????????????????????????????????????????????????????????????????????????????????????????????????????????????????????????????????????????????????????????????????????????????????????????????????????????????????????????????????????????????????????????????????????????????????????????????????????????????????????????????????????????????????????????????????????????????????????????????????????????????????????????????????????????????????????????????????????????????????????????????????????????????????????????????????????????????????????????????????????????????????????????????????????????????????????????????????????????????????????????????????????????????????????????????????????????????????????????????????????????????????????????????????????????????????????????????????????????????????????????????????????????????????????????????????????????????????????????????????????????????????????????????????????????????????????????????????????????????????????????????????????????????????????????????????????????????????????????????????????????????????????????????????????????????????????????????????????????????????????????????????????????????????????????????????????????????????????????????????????????????????????????????????????????????????????????????????????????????????????????????????????????????????????????????????????????????????????????????????????????????????????????????????????????????????????????????????????????????????????????????????????????????????????????????????????????????????????????????????????????????????????????????????????????????????????????????????????????????????????????????????????????????????????????????????????????????????????????????????????????????????????????????????????????????????????????????????????????????????????????????????????????????????????????????????????????????????????????????????????????????????????????????????????????????????????????????????????????????????????????????????????????????????????????????????????????????????????????????????????????????????????????????????????????????????????????????????????????????????????????????????????????????????????????????????????????????????????????????????????????????????????????????????????????????????????????????????????????????????????????????????????????????????????????????????????????????????????????????????????????????????????????????????????????????????????????????????????????????????????????????????????????????????????????????????????????????????????????????????????????????????????????????????????????????????????????????????????????????????????????????????????????????????????????????????????????????????????????????????????????????????????????????????????????????????????????????????????????????????????????????????????????????????????????????????????????????????????????????????????????????????????????????????????????????????????????????????????????????????????????????????????????????????????????????????????????????????????????????????????????????????????????????????????????????????????????????????????????????????????????????????????????????????????????????????????????????????????????????????????????????????????????????????????????????????????????????TTGCCAGGTTATCATCCATTTGAGTGGAAACCCCCTTTGAAAAATGTGTCCACTAATACAGAAGTGGGAATTATAGATGGGCTGTCAGGGCTGCCACACTCAGTTGATGACTACCCAGTAGACACAATTGCCAAGAGGTTTCGATATGATGCAGCCTTAGTTTCTACCTTAATGGATATGGAGGAAGACATCTTGGAAGGGATGAAAGCCCAAGACCTGGATGACTACTTGAATGGTCCCTTCACTGTGGTGGTGAAGGAGTCTTGTGATGGGATGGGAGATGTCAGCGAGAAGCATGGAAGTGGACCGGCTGTTCCTGAGAAGGCAGTTCGATTTTCTTTCACACTCATGAGCATCACTATAGCTCATGGCAATGAAAATGTAAGGATCTTTGAAGAAGCCAAGCCTAATTCAGAGCTGTGTTGCAAACCCCTGTGTCTTATGCTGGCTGATGAATCAGACCATGAGACACTGACAGCCATCCTGAGCCCTCTCATAGCAGAAAGAGAGACCATGAAAAACAGCATCCTGCTTCTTGAAATGGGAGGCATCCTCAGAACATTCAAATTCATCTTTAGAGGTACAGGGTATGATGAGAAACTTGTCCGTGAAGTGGAAGGCCTTGAAGCCTCAGGCTCTACTTACATCTGCACCCTTTGTGATGCAACCCGCCTGGAAGCCTCTCAGAACTTGGTCCTCCACTCCATAACAAGAAGTCATGCTGAAAA???????????????????????????????????????????????????????????????????????????????????????????????????????????????????????????????????????????????????????????????????????????????????????????????????????????????????????????????????????????????????????????????????????????????????????????????????????????????????????????????????????????????????????????????????????????????????????????????????????????????????????????????????????????????????????????????????????????????????????????????????????????????????????????????????????????????????????????????????????????????????????????????????????????????????????????????????????????????????????????????????????????????TGCAGCAAGAACCGGCTGGCATCGCGACAAAGCTTCTGGGCTGAGCTGAATGTGGCCTGGCTACACCATCGCAATGTGGTACGTGTTGTAGCTGCCAGCACTTGTGCCCCTGCCAACCAAGACAGCCTGGGCACCATAATCATGGAATATGCTGGCTGCACTACCCTGCACCATGTCATCTATGGCCCTGGCTGCCTGCAGGGAAAGGGAGAGGATGATGGGGGTGGACGTGGCAAGGAACCCTTAAGCATTGTTGAGTCCCTGGGTTATTCCTCTGATATTGTGACTGGCTTAGTCTTCCTCCACTCACAGTGTGTTGTGCACCTGGACCTGAAGCCTGCTAATGTATTCATCACCGAGCAGGG???????????????????????????????????????????????????????????????????????????????????????????????????????????????????????????????????????????????????????????????????????????????????????????????????????????????????????????????????????????????????????????????????????????????????????????????????????????????????????????????????????????????????????????????????????????????????????????????????????????????????????????????????????????????????????????????????????????????????????????????????????????????????????????????????????????????????????????????????????????????????????????????????????????????????????????????????????????????????????????????????????????????????????????????????????????????????????????????????????????????????????????????????????????????????????????????????????????????????????????????????????????????????????????????????????????????????????????????????????????????????????????????????????????????????????????????????????????????????????????????????????????????????????????????????????????????????????????????????????????????????????????????????????????????????????????????????????????????????????
Myuchelys_georgesi		TSSTAAACCT-AAATTTTCT-CAASATACWRR-ATTTKGCCAGAGAM-CTACAAMCCAAACGTTTAAAACTCAAAGGACTTGGCGG-TGCCCCAAA-CCCACCTAGAGGAGCCTGTTCTATAATCGATAATCCACGATTCACCTCACCACCTCTAGCCC-AC-AGCCTATATACCTCCGTCCACAGCTTACCCTACTAAGGAAT-AAAAGTAAGCACAATAGTTCA-CACAA--CTAATAAGTCAGGTCAAGGTGTAGCCAACTGAGGTGGAAGAAATGGGCTACATTTTCTACAC--TAGAAACA---TTCA-C---GGAAAGAGCCCTGAAA--TATGGACTT-AAAAGTAGGATTTAGCAGTAATGTG-AAAGCAGAGAGTCCACACTAACTC?????????????????????????????????????????????????????????????????????????????????CG-TGGGMTCCTGACCGTGGGAAGGTAGMGTAATCACTCGTCTTTTAAWTAAAGACTAGAATGAATGGCTAAACGAG-GTTCTATCTGTCTCTTACAAA-CAATCAGTGAAATTGATCCCCCCGTGCAAAAGCGAGAATAATACCATAAGACGAGAAGACCCTGTGGAACTTTAAGT--ATAAGTCATCACCATTAACCTACT-------ACTCAACAGAATAAC-CTACTCATAACCTTC-CTGACTTCCAACTTTCGGTTGGGGCGACCTCGGAGAAAAATAAAACCTCCGAAA--ATTAC----------TACTAAGACAATACAAACCTAAGTGCC-TACGGCA--AAACGATCCAATATACTTGATCAACGAACCAAGCTACCCCAGGGATAACAGCRCAATCCCCTCTTAGAGW-CCATATCTTTGAMGGGGCCTWNCGACCTCGATGATGG???????????????????????????????????????TCTACCTGATTTTTGGGGCCTGAGCAGGAATAATCGGAACAGCTCTTAGTCTATTAATTCGAACAGAACTAAGCCAACCAGGTCCCCTATTAGGAGATGATCAAGTATACAATGTAATTGTTACAGCCCACGCCTTAATTATAATCTTTTTCATAGTTATACCTATTATAATTGGTGGATTTGGAAACTGATTAGTTCCAATAATAATTGGATCGCCAGATATAGCATTTCCACGAATGAATAATATAAGCTTTTGACTTCTACCACCATCACTACTACTACTTCTAGCCTCCTCTGGTATCGAAGCCGGAGCTGGAACAGGGTGAACTGTATATCCCCCTTTGGCTGGAAATATAGCCCACGCCGGAGCTTCTGTCGACCTAACTATCTTCTCCCTACACTTAGCCGGGGCGTCCTCAATTTTAGGGGCCATCAACTTCATCACCACCGCAATTAATATAAAAACCCCATCAATATCACAATACCAAACACCACTTTTCGTATGATCAGTACTTATCACAGCTGTATTACTATTACTCTCCCTTCCAGTACTTGCTGCAGGCATTACTATACTTTTAACAGACCGAAACCTAAATACAACCTTCTTTGATCCATCTGGTGGAGGAGACCCAATCCTATACCAACACCTA?????????????????????????????????????????????????????????????????????????????????????????????????????????????????????????????????????????????????????????????????????????????????????????????????????????????????????????????????????????????????????????????????????????????????????????????????????????????????????????????????????????????????????????????????????????????????????????????????????????????????????????????????????????????????????????????????????????????????????????????????????????????????????????????????????????????????????????????????????????????????????????????????????????????????????????????????????????????????????????????????????????????????????????????????????????????????????????????????????????????????????????????????????????????????????????????????????????????????????????????????????????????????????????????????????????????????????????????????????????????????????????????????????????????????????????????????????????????????????????????????????????????????????????????????????????????????????????????????????????????????????????????????????????????????????????????????????????????????????????????????????????????????????????????????????????????????????????????????????????????????????????????????????????????????????????????????????????????????????????????????????????????????????????????????????????????????????????????????????????????????????????????????????????????????????????????????????????????????????????????????????????????????????????????????????????????????????????????????????????????????????????????????????????????????????????????????????????????????????????????????????????????????????????????????????????????????????????????????????????????????????????????????????????????????????????????????????????????????????????????????????????????????????????????????????????????????????????????????????????????????????????????????????????????????????????????????????????????????????????????????????????????????????????????????????????????????????????????????????????????????????????????????????????????????????????????????????????????????????????????????????????????????????????????????????????????????????????????????????????????????????????????????????????????????????????????????????????????????????????????????????????????????????????????????????????????????????????????????????????????????????????????????????????????????????????????????????????????????????????????????????????????????????????????????????????????????????????????????????????????????????????????????????????????????????????????????????????????????????????????????????????????????????????????????????????????????????????????????????????????????????????????????????????????????????????????????????????????????????????????????????????????????????????????????????????????????????????????????????????????????????????????????????????????????????????????????????????????????????????????????????????????????????????????????????????????????????????????????????????????????????????????????????????????????????????????????????????????????????????????????????????????????????????????????????????????????????????????????????????????????????????????????????????????????????????????????????????????????????????????????????????????????????????????????????????????????????????????????????????????????????????????????????????????????????????????????????????????????????????????????????????????????????????????????????????????????????????????????????????????????????????????????????????????????????????????????????????????????????????????????????????????????????????????????????????????????????????????????????????????????????????????????????????????????????????????????????????????????????????????????????????????????????????????????????????????????????????????????????????????????????????????????????????????????????????????????????????????????????????????????????????????????????????????????????????????????????????????????????????????????????????????????????????????????????????????????????????????????????????????????????????????????????????????????????????????????????????????????????????????????????????????????????????????????????????????????????????????????????????????????????????????????????????????????????????????????????????????????????????????????????????????????????????????????????????????????????????????????????????????????????????????????????????????????????????????????????????????????????????????????????????????????????????????????????????????????????????????????????????????????????????????????????????????????????????????????????????????????????????????????????????????????????????????????????????????????????????????????????????????????????????????????????????????????????????????????????????????????????????????????????????????????????????????????????????????????????????????????????????????????????????????????????????????????????????????????????????????????????????????????????????????????????????????????????????????????????????????????????????????????????????????????????????????????????????????????????????????????????????????????????????????????????????????????????????AGTCATACTTCTTTGCATATTTGTAATCCTTTATTTAAATAGGGAG-AGAGGGTGGGTGATATTAATTGAAACAGAGATGCATGCTAGTTATCCAGCAGTTATGAACAGCATAAATCATATCCATAAAAATCATTTCAAACAGATCTATGTTTCAGTGTATGTATTTATCTGGCTTTCAGCAGGATTGATATATTCATAAAATTCATTGCATTTTAAAAATGAAAAGCCAGATTCATCATTGTTGTTCCAGTTTTACATCACTGTAACTCCACTGAACCCAGCATAGAGTTAGGCTAGTGATAGGGGTGAACCAGATCCAATGTTTTGTGTTTCAAGCAATCTGGTAGGCATTAGGTTGACTCTATGAGATCTGTGGGTTTTACTAAGGCAGATTTTTTTCC-TTCATCCTCACAGTTCTGAGTCACGCCCTTTGCCAGTCATCTCTGGGTAAGAAACTGAAGCTTGACTGAGAAGTGAGGAAGAATGTTTATATCTTTGTAATTATTGAAGCATTGCTAC---ATTTTGGTGCAATGTATGGAAAGGATAAATATAACAAAGGACACTTACAAGTGAGTCCTTTGCTGGGCACGTGAACATGTTGGGAATTGTCCAAGGTCATTTTTGTCCTATGGATGTGTCTGGAGTCAGCCTCTCAGCTCCTTTCCATGAAGAATGAGAATTATAATGCATGTGAAGTCCAGTCCCGCCTGGAACTGAGTGCCCTC-AAACCCCATTGACTTTGGGAGTTGCAGATGCTCAGCATCTC--ACCGGATTGGCTCAATGGTCACCTAAGAATTGTTTAGAGTCGGAGCTGCTTCTTTGGCAGACCTCATGCATCAATATTTAGCATTTCATTTGCAGCATAAGGCATTCTGAGAAATACAGAGAGAGGGGG--AAAGGGACTTTAG-GAGGACATTTGTCTTCTAGCATCTGTCAAAGTCACAAAGCTTAACAGGAATCAATGAAAATCTGTGACTTCTATTTTTGTCATATTAAAAGTGTGATGTTTTTGTTATTCCTGGAAATATGTTATGTGACTGAAGTGATTTAATTTCTTAATGTTCTGTCTTTCAGATACAGATGGCTATCCAGCAAATAG
Mesoclemmys_dahli		???????????????????????????????????TCCGCCAGAGTA-CTACTAATTATACATTAAAAACTCAAAGGACTTGACGG-TGTCTCAAA-CCCAACTAGAGGAGCCTGTTCTATAATCGATAATCCACGATTCACCTCACCACCCAAAGCCT-CTCAGCCTATATACCTCCGTCTTCAGCCTACCCTGTGAAAGTAT-AAAAGTAGGCACAATAGTTAATAAGCA--CTAACAAGTCAGGTCAAGGTGTAGCTAA-TGGGGTGGAAGAAATGGGCTACATTTTCTACCA--TAGAAATAA-TCTTA-C---GGAGGGCACTTTGAAA--CAAGGCCC-AATAAGCAGGATTTAGTAGTAATGTATGGAGCAAAGAGCCTACATTAATTAGGACCTGA-AACGCGTACACACCGCCCG??????????????????????????????????????????????????????????????????????????????????????????????????????????????????????????????????????????????????????????????????????????????????????????????????????????????????????????????????????????????????????????????????????????????????????????????????????????????????????????????????????????????????????????????????????????????????????????????????????????????????????????????????????????????????????????????????????????????????????????????????????????????????????????????????????????????????????????????????????????????????????????????????????????????????????????????????????????????????????????????????????????????????????????????????????????????????????????????????????????????????????????????????????????????????????????????????????????????????????????????????????????????????????????????????????????????????????????????????????????????????????????????????????????????????????????????????????????????????????????????????????????????????????????????????????????????????????????????????????????????????????????????????????????????????????????????????????????????????????????????????????????????????????????????????????????????????????????????????????????????????????????????????????????????????????????????????????????????????????????????????????????????????????????????????????????????????????????????????????????????????????????????????????????????????????????????????????????????????????????????????????????????????????????????????????????????????????????????????????????????????????????????????????????????????????????????????????????????????????????????????????????????????????????????????????????????????????????????????????????????????????????????????????????????????????????????????????????????????????????????????????????????????????????????????????????????????????????????????????????????????????????????????????????????????????????????????????????????????????????????????????????????????????????????????????????????????????????????????????????????????????????????????????????????????????????????????CCATCCAACATCTCAGCATGATGAAACTTCGGCTCCCTTCTTGGGGCATGCCTTGCACTACAGCTAGCTACCGGAATTTTCCTAGCCATGCACTACTCCCCTAACATCTCCCTAGCATTCTCATCAATCACCCACATCCAACGAGATGTTCAATACGGCTGACTCATCCGAAATATACATGCAAACGGAGCCTCACTATTCTTCATCTGCATATACCTCCATATCGGACGCGGAGTATACTACGGCTCATATTTATACAAAAAAACCTGAAACACAGGCGTAGCTCTACTTCTTCTAGTCATAGCCACCGCATTCATAGGGTACGTACTACCATGAGGACAAATATCATTTTGAGGCGCTACAGTAATCACCAACCTCCTATCAGCCCTACCCTATATTGGACACACCATGGTCCAATGAATCTGAGGCGGATTTTCAGTAGACAACGCCACCTTAACCCGGTTCTTCACACTCCACTTCCTCATCCCATTTGCCATCGCAGCCATAGCAATAGTCCACCTCCTATTCCTCCATGAAACAGGTTCAAACAACCCAACAGGACTAAACTCCCACTGCGACAAAATCCCATTCCATCCATACTTCTCCTACAAAGACCTACTAGGACTCATTATCATACTAACCTGCCTACTAAACTTAGCCCTCTTCTCACCAAACCTACTAGGTGACCCGGACAATTTTACCCCAGCCAACCCCCTTGTCACCCCACCACATATTAAACCAGAATGATATTTTCTATTCGCCTACGCCATCCTACGATCAATCCCCAACAAACTTGGAGGCGTCTTGGCCCTCTTATTCTCAATCCTTATTCTCCTCCTAATACCTGCCCTCCACACATCAAAACAACGAACCTCTACATTCCGACCTATAGCCCAAATAACATTTTGATGCCTGACAGCAGACCTACTCATCCTAACATGAATCGGAGGCCAACCAGTAGAAGACCCATTCATCCTCATCGGACAAGTAGCCTCCGTAATGTATTTTACACTGATCCTTATCGCCCTACCCCTTGTAAACCTAGTAGAAAATAA--AATGACAAACT?????????????????????????????????????????????????????????????????????????????????????????????????????????????????????????????????????????????????????????????????????????????????????????????????????????????????????????????????????????????????????????????????????????????????????????????????????????????????????????????????????????????????????????????????????????????????????????????????????????????????????????????????????????????????????????????????????????????????????????????????????????????????????????????????????????????????????????????????????????????????????????????????????????????????????????????????????????????????????????????????????????????????????????????????????????????????????????????????????????????????????????????????????????????????????????????????????????????????????????????????????????????????????????????????????????????????????????????????????????????????????????????????????????????????????????????????????????????????????????????????????????????????????????????????????????????????????????????????????????????????????????????????????????????????????????????????????????????????????????????????????????????????????????????????????????????????????????????????????????????????????????????????????????????????????????????????????????????????????????????????????????????????????????????????????????????????????????????????????????????????????????????????????????????????????????????????????????????????????????????????????????????????????????????????????????????????????????????????????????????????????????????????????????????????????????????????????????????????????????????????????????????????????????????????????????????????????????????????????????????????????????????????????????????????????????????????????????????????????????????????????????????????????????????????????????????????????????????????????????????????????????????????????????????????????????????????????????????????????????????????????????????????????????????????????????????????????????????????????????????????????????????????????????????????????????????????????????????????????????????????????????????????????????????????????????????????????????????????????????????????????????????????????????????????????????????????????????????????????????????????????????????????????????????????????????????????????????????????????????????????????????????????????????????????????????????????????????????????????????????????????????????????????????????????????????????????????????????????????????????????????????????????????????????????????????????????????????????????????????????????????????????????????????????????????????????????????????????????????????????????????????????????????????????????????????????????????????????????????????????????????????????????????????????????????????????????????????????????????????????TGCAGCAAGAACCGGCTGGCATCGCGACAAAGCTTCTGGGCTGAGCTGAATGTGGCCCGGCTACACCATCCCAATGTGGTACGTGTTGTAGCTGCCAGCACTTGTGCCCCTGCCAACCAAGACAGCCTGGGCACCATAATCATGGAATATGCTGGCTGCACTACCCTGCACCATGTCATCTATGGCACTGGTTGCCTGCAGGGAAAGGGAGAGGATGATGGGGGTGGACATGGCAAGGAACCCTTAAGCATTGCTGAATCCCTGGGTTATTCCTCTGATATTGTGACTGGCTTAGTCTTCCTCCACTCACAGTGTGTTGTGCACCTGGACCTGAAGCCTGCTAATGTATTCATCACCGAGCAGGG????????????????????????????????????????????????????????????????????????????????????????????????????????????????????TCATATCCATAAAAGTCATTTCAAACAGATCTGTGTTTCAGTGAATGTATTTATCTGGCTTTCAGCAGGATTGAAATAGTCATAAAAATCATGGCATTTTAAAAATGAAAAGCCAGATTCATCATTGTTGTTCCAGTTTTACATTAGCGTAACTCCACTGAACCCAGCATAGAGTTAGGCTAGTGATAGGGGTGAATCGGATCCAATGTTTTGTGTTTCAAGCAATCTGGCAGGCATTAGATTGACTCTGAGAGATCTGTGAGTTTTACTAAGGCAGATTTTTTTCC-TCCATCCTCACAGTTCTGAGTCACACCCTTTGCCAGTCATCTCTGGGTAAGAAACTGAAGCTTGTCTGAGAAGTGAGGAAGAATGTTTCAATCTTTGTAATTATTGAAGCATTACTAC---ATTTTGGTGCAATGTATGGAAAGGATTAATATAACAAAGGATACTTTCAAGTGAGTCCTTTGCTGGGCACGTGAACGTGTTGGGAATTGTTAAGGGTCATTTTTGTCCTACGGATGTGTCTGGAGTCAGCCTTTCAGCTCCTTTCCATGAAGAATGAGAATTATAATGCATATGAAGCCCGGTCCTGCCTGGCACTGAGTGCCCCC-AAACCCCATTGACTTTGGGAGTCGCAGATGTTCAGCATCTC--ACCGGATTGGCTCAATGGTCGCCTAAGAATTGTTTAGAATCAGAGCTGCTTCTTTGGCAGACCTAATGCATCAATATTTATCATTTCGTTTGCAGCATAAGGCATTCTGAGAAATACAGAGAG-GGGGG--AAAGGGACTGTAT-GAGGACATTTGTCTTCTAGCATCTGTCAAAGTCACAAAGCTTAGCAGGAATCAATGAAAATCTGTGACTTCTATTTTTGTCATATTAAAAGTGTGAAGTTTTTGTTATTCCTGGAAATATATTATGTGACTGAAGTGATTTAATGTCTTAATGTTCTGTCTTTCAGATA??????????????????????
Mesoclemmys_gibba		???????????????????????????????????TCCGCCAGAGTA-CTACTAACCACACATTTGAAACTCAAAGGACTTGACGG-TGCCTCAAA-CCCAACTAGAGGAGCCTGTTCTATAATCGATAATCCACGATTTACCTCACCACCCTTAGCC--CACAGCCCATATACCTCCGTCTTCCGCCTACCCTGTGAAAGTAT-AAAAGTAGGCACAATAGTCAACAAGCA--CTAACAAGTCAGGGCAAGGGGTAGCCCA-TAAGGGGGAAAAAATGGGCTACATTTTCTATAA--TAAAAATAT-TCTTA-C---GGAGGGGACTTTGAAA--CAGGGCCC-AATAAGCAGGATTTAGCAGTAATGTA-GAAGCAGAGAGCCCACATTAATTAGGACCTGA-GAGGCGTACACACCGCCCGTCACCCTCATCAAAAA?AGGGGTGATGCCGGCCCAGTGACATTGTTCATCGGCCG-CGGTATCCTGACCGTGCGARGGTAGCATAATCACTTGTCTTTTAAATAAAGACTGGAATGAATGGCTAAACGAG-GCTCTATCTGTCTCTTACAGG-AAACCAGTGAAATTGATCCCCTCGTGCAAAAGCGRGGATAATAACATAAGACGAGAAGACCCTGTGGAACTTTAATTTAAAAGTTAACAACTAATAANCCCAC-------AAMCCATAGGG-AGMACATATCATGATYCCA-CTTAGCCTTAATTTTCGGTTGGGGTGACCTCGGAGAAAAACMAAACCTCCGARGA-YTAW-----------TACCAAGA-ACAACAGACCAARGTG-CCTCCRGCA--AAACGATCCAATACATTTGATTAATGAACCAAGCTACCCCAGGGATAACAGCGCAATCCCCTCTTAGAGT-CCCTATCAACGATGGGGGTTTACGACCTCGATGTTGGWTCAGGACATCCTAATGGTGCAGCCGCTATTAAGGATC???????????????????????????????????????????????????????????????????????????????????????????????????????????????????????????????????????????????????????????????????????????????????????????????????????????????????????????????????????????????????????????????????????????????????????????????????????????????????????????????????????????????????????????????????????????????????????????????????????????????????????????????????????????????????????????????????????????????????????????????????????????????????????????????????????????????????????????????????????????????????????????????????????????????????????????????????????????????????????????????????????????TGACTACCAAAAGCTCATGTAGAAGCACCAATCGCCGGGTCAATAGTCCTAGCTGGCGTACTATTAAAACTAGGCGGATACGGTATTATCCGAATATCATCAATCCTCAACCCA-CCATCAAAAGACCTACTATACCCATTCATAATCATGGCCCTCTGGGGCATTATTATGACTAGCCTGATCTGCCTCCGACAAACAGACCTAAAATCACTAATCGCCTACTCATCGGTAAGCCACATGGGGTTAGTAATCGCCGCTACACTTGTCCAAACCCCATGAGCCCTTACCGGAGCCACCACCTTAATAATTGCCCACGGCTTAACATCCTCAATACTATTCTGTTTATCCAACACAAACTACGAACGAACAAATAGCCGAATCCTTCTTATCACCCGAAACCTACAATCACTATTACCCCTGATAGCCCTCTGATGACTACTATCTAGCCTTACTAACATGGCTCTCCCACCAACCATCAATCTAACAGGAGAACTCTATGTCATTACTTCCCTATTCAACTGGTCAAAAACTACCATCCTAATCACAGGACTAGGCACTGTGATCACAGCTATCTACACACTATACATATTCTCAGCTACACAGTGAGGCGGAGAACTTCCATCAAAT---ATTAAAACCATCCCCCCCACCCACACACGGGAACACCTAATTATAACCCTGCACCTACTACCTGCTGCCCTACTCATAACCAAACCCCAACTGATCTCAAACATATTC?????????????????????????????????????????????????????????????????????????????????????????????????????????????????????????????AGCCTGATGAAACTTCGGCTCCCTTCTAGGAGCATGCCTTGTACTACAATTAGCCACCGGAATCTTCCTAGCCATACACTACTCATCTAACATCTCCCTAGCATTCTCATCAATCTCCCACATCCAACGAGATGTTCAATACGGCTGACTAATCCGAAACATACATGCAAACGGGGCCTCACTATTCTTCATCTGCATATACCTCCACATTGGACGAGGAATCTACTATGGCTCATACCTGTACAAAAAAACCTGAAACACAGGAGTAATCCTACTCCTCCTAGTAATAGCCACCGCATTCGTAGGCTATGTGCTCCCATGAGGCCAAATATCATTCTGAGGGGCCACAGTAATCACCAACCTACTCTCTGCCCTCCCCTACATCGGACACACCATAGTACAATGAATCTGAGGTGGATTTTCCGTAGACAACGCCACCTTAACCCGATTCTTCACATTCCACTTCCTCATCCCATTTATCATCACAGGCATAGTGGCAGTCCACCTCCTATTCCTCCATGAAACAGGTTCAAACAACCCCACAGGACTAAACTCCAATTGCGACAAAATCCCATTCCACCCATACTTCTCCTACAAAGACCTCCTAGGACTTATTATTATACTAACCTGCCTACTAAACCTAGCCCTATTCTCACCAAACCTCCTAGGCGACCCAGACAACTTCACCCCAGCCAACCCACTCAACACCCCCCCACATATCAAGCCAGAGTGGTACTTCCTATTCGCCTACACTATCCTACGATCAATCCCCAACAAACTGGGGGGAGTCCTGGCCCTTTTATTCTCAATCCTAATCCTCCTCCTAATGCCCGCCCTTCACACATCAAAACAACGAACCGCTATATTCCGACCCATGACCCAAGCAACATTTTGATGCCTAACAGCAGACCTACTCATCCTGACATGAATTGGGGGCCAACCAGTAGAACACCCTTTCACCCTCATTGGACAAACAGCCTCCGTAATGTACTTCACACTAATCCTCATCATCCTACCCCTTGTGAACCTCATTGAAAACAA--AATAACAAACTGCAAATAAAGAGAAAGCAGAGGAGGTGGCCTCTTTGGACAAAGGCACTGTGGTGCAGATGGATGC---GGCAGTTCCAGTGGTAGAAAAGCCACTTCTGGAAGAAACAGCCTTAAAGGACAATAAGCAGGCTCTTGAAAAAGATGCTGACAAACTGAAAATGCAAGACAATGCAGCTCATCAAGCAAACCTGCAGCAGCTCTGTCGCATCTGTGGAGTTTCATTTAAAACTGATCGTTACAAAAGAAGTCATCCAGTGCATGGACCAGTGGACAGTGAAACTCAAGGACTTCTGAGAAAGAAAGAGAAAAGAGCAACATCTTGGCCAGATCTTATTGCCAAGGTTTTTAAGATTGACGTGCGAGGTGATATTGACACAATCCACCCCACTCGGTTTTGTCACAACTGCTGGAGCATCATCCATAGAAAGTTCAGCAATGCACCATGTGAAGTGTATTTCCCGAGGAACAGCACCATGGAGTGGCAGTCCCATTCCCTGAGCTGCACTGTTTGTTACACTGCTCATCGTGGGGTCAAGAGAAAGAACCAGCCATCCAACTTACAGCTCAGCAAAAGGCTCAAGATCATTGCAGAACGTGCCCGAAAAACTAAAAATGTAAAAAAA---CAAGCACAGGTAAACAACAAAAACCTTATGAAAAAGATTGCCAACTGCAAAAAGATACATCTTAGCACTAAACTTCTTGCAGTTGACTACCCTGCAGATTTCGTTAA-GTCCATCTCTTGCCAAATCTGTGAGCATATTCTGGCAGATCCAGTGGAAACGACATGTAGCCACTTGTTCTGCAGAACCTGCATCCTGAAGTGCCTCAAAGTTATGGGCAGCTATTGCCCCTCTTGCCGATACCCTTGCTTCCCTACCGACTTGGAGAGCCCAGTGAAATCCTTCCTGAACATCCTCAATTCCCTGGCTGTGCGATGCCCAGTGAAAGAATGTGATGAGGAGGTTTTGCTGGGAAAATACTGCCATCATTTGTCCAGCCACAAAGAGCTGAAAGGGAAAGAGATTTACTCGCACATAAATAAAGGCGGCAGACCAAGGCAACATTTACTGTCATTGACGAGGAGAGCTCAAAAGCATCGTCTGAGAGAACTCAAGCTTCAAGTCAAAGCTTTTGCTGAGAAAGAAGAAGGAGGTGATATAAAGGCTGTGTGCCTAACTTTGTTCTTGCTGGCTCTCAGAGCAAGAAATGAACACAGACAAGCAGATGAGTTGGAAGCTATAATGCAAGGGAAGGGATCAGGGCTTCACCCGGCTGTTTGCCTGGCAATCCGAGTCAACACCTTTCTCAGCTGTAGCCAGTACCATAAAATGTACAGAACTGTAAAAGCCATAAGTGGGAGGCAGATCTTCCAGCCACTGCATGCTCTCCGCACTGCTGAAAAGGCCCTCTTGCCAGGTTATCATCCATTTGAGTGGAAACCCCCTTTGAAAAATGTGTCCACTAATACAGAAGTGGGAATTATCGATGGGCTGTCAGGGCTGCCACACTCAGTTGATGACTACCCAGTAGACACAATTGCTAAGAGGTTTCGATATGATGCAGCCTTAGTTTCTGCCTTGATGGACATGGAGGAAGACATCTTGGAAGGGATGAAAGCCCAAGACCTGGATGACTACTTGAATGGTCCCTTCACTGTGGTGGTGAAGGAATCTTGTGATGGGATGGGAGATGTCAGCGAGAAGCATGGAAGTGGACCGGCTGTTCCCGAGAAGGCAGTTCGATTTTCTTTCACGCTCATGAGCATCACTATAGCTCATGGCAATGAAAATGTAAGGATCTTTGAAGAAGCCAAGCCTAATTCAGAGCTGTGTTGCAAACCCCTGTGTCTTATGCTAGCTGATGAATCAGACCATGAGACGCTGACAGCCATCCTGAGCCCCCTCATAGCAGAAAGAGAGACCATGAAAAACAGTGTCCTGCTTCTTGAAATGGGAGGCATCCTCAGAATATTCAAATTCATCTTTAGAGGTACAGGGTATGATGAGAAACTTGTCCGTGAAGTGGAAGGCCTTGAAGCCTCAGGCTCTACTTACATCTGCACCCTTTGTGATGCAACCCGCCTGGAAGCCTCTCAGAACTTGGTCCTCCACTCCATAACAAGAAGTCATGCTGAAAACCTGGAGCGGTATGAGGTATGGAGGTCCAACCCATATCATGAATCTGTTGATGAGCTACGTGACAGAGTGAAGGGTGTTTCTGCCAAACCTTTCATTGAGACTGTTCCTTCCATAGATGCATTGCATTGTGACATTGGCAATGCAGCTGAGTTCTACAAGATTTTCCAGTTTGAGATAGGTGAGGTGTACAAGAACCCTAACACATCTAAAGAAGAGAGGAAGAGGTGGCAGTCAACTCTTGACAAGCACCTCAGGAAGAAGATGAACCTGAAGCCCATAATGAGGATGAATGGAAACTTTGCTAGAAAGCTTATGTCCAAAGAGACAGTGGAAGCAGTCTGTGAATTAATAACGGGTGAGGAAAGGCATGAAGCCCTAAGAGAACTGATGGACCTTTACCTTAAGATGAAACCAGTGTGGCGGTCTTCATGCCCAGCCAAAGAGTGCCCAGAACTGCTGTGTCAGTATAGCTTCAACTCACAACGTTTTGCTGAGCTCCTGTCCACAAAGTTCAAGTACAGATATGAAGGCAAGATTACAAATTACTTTCACAAAACTCTTGCTCATGTTCCTGAAATCATTGAAAGAGATGGCTCCATTGGGGCCTGGGCAAGTGAAGGGAACGAGTCTGGGAACAAACTGTTTAGGCGTTTCTGCAGCAAGAACCGGCTGGCATCGNGACAAAGCTTCTGGGCTGAGCTGAATGTGGCCCGGCTACACCATCCCAATGTGGTACGTGTTGTAGCTGCCAGCACTTGTGCCCCTGCCAACCAAGACAGCCTGGGCACCATAATCATGGAATATGCTGGCTGCACTACCCTGCACCATGTCATCTATGGCACTGGTTGCCTGCAGGGAAAGGGAGAGGATGACGGGGGTGGACATGGTAAGGAACCCTTAAGCATTGCTGAATCCCTGGGTTATTCCTCTGATATTGTGACTGGCTTAGTCTTCCTCCACTCACAGTATGTTGTGCACCTGGACCTGAAGCCTGCTAATGTATTCATCACCGAGCAGGG?????????????????????????????????????????????????GAGTGTGTGTGATATTAATTGAAGCAGAGATGCACGCTAGTTATATAGCAGTTATGAACAGCATAAATCATATCCATAAAAGTCATTTCAAACAGATCTGTGTTTCAGTGAATGTATTTATCTGGCTTTCAGCAGGATTGAAATAGTCATAAAAATCATGGCATTTTAAAAATGAAAAGCCAGATTCATCATTGTTGTTCCAGTTTTACATTAGCGTAACTCCACTGAACCCAGCATAGAGTTAGGCTAGTGATAGGGGTGAATCGGACCCAATGTTTTGTGTTTCAAGCAATCTGGCAGGCATTAGATTGACTCTGAGAGATCTGTGAGTTTTACTAAGGCAGATTTTTTTCC-TCCATCCTCACAGTTCTGAGTCACACCCTTTGCCAGTCATCTCTGGGTAAGAAACTGAAGCTTGTCTGAGAAGTGAGGAAGAATGTTTCAATCTTTGTAATTATTGAAGCATTACTAC---ATTTTGGTGCAATGTATGGAAAGGATTAATATAACAAAGGATACTTACAAGTGAGTCCTTTGCTGGGCACGTGAACGTGTTGGGAATTGTTAAGGGTCATTTTTGTCCTACGGATGTGTCTGGAGTCAGCCTTTCAGCTCCTTTCCATGAAGAATGAGAATTATAATGCATATGAAGCCTGGTCTTGCCTGGCACTGAGTGCCCCCCAAACCCCATTGACTTTGGGAGTCGCAGATGTTCAGCATCTC--ACCGGATTGGCTCAATGGTCGCCTAAGAATTGTTTAGAATCAGAGCTGCTTCTTTGGCAGACCTCATGCATCAATATTTATCATTTCGTTTGCAGCATAAGGCATTCTGAGAAATACAGAGAG-GGGGG--AAAGGGACTGTAT-GAGGACATTTGTCTTCTAGCATCTGTCAAAGTCACAAAGCTTAACAGGAATCAATGAAAATCTGTGACTTCTATTTTTGTCATATTAAAAGTGTGAAGTTTTTGTTATTCCTGGAA???????????????????????????????????????????????????????????????????????????
Hydromedusa_maximiliani		??????????????????????????????????????????????????????????????????????????????????????????????????????????????????????????????????????????????????????????????????????????????????????????????????????????????????????????????????????????????????????????????????????????????????????????????????????????????????????????????????????????????????????????????????????????????????????????????????????????????????????????????????????????????????????????????????????????????????????????????????????????????????????????????????????????????????????????????????????????????????????????????????????????????????????????????????????????????????????????????????????????????????????????????????????????????????????????????????????????????????????????????????????????????????????????????????????????????????????????????????????????????????????????????????????????????????????????????????????????????????????????????????????????????????????????????????????????????????????????????????????????????TATACTTAATTTTTGGGGCCTGAGCAGGAATAATTGGAACAGCTCTTAGCCTATTAATTCGAACAGAACTAAGCCAACCCGGACCATTACTAGGAGATGACCAAGTATATAATGTTATTGTAACAGCCCATGCCTTCATTATAATCTTTTTTATAGTCATACCTGTTATAATTGGGGGATTTGGAAACTGATTAGTTCCAATAATGATTGGAGCACCAGACATAGCATTTCCACGAATAAATAATATAAGTTTCTGACTCCTTCCTCCATCACTACTCCTTTTATTAGCCTCATCAGGAATTGAAGCAGGAGCTGGAACAGGATGAACTGTATACCCCCCACTAGCTGGAAATATTGCCCATGCCGGAGCCTCTGTAGATCTTACTATTTTTTCATTACACCTAGCTGGAGCATCATCAATCTTAGGAGCTATTAATTTTATTACTACAGCAATCAATATAAAAACCCCATCTATATCACAATACCAAACACCACTCTTTGTATGATCAGTATTAATTACAGCTGTTTTACTACTACTATCCCTACCCGTCCTTGCAGCAGGGATTACCATACTCCTCACAGACCGAAATCTAAATACAACCTTCTTCGACCCGTCCGGAGGAGGAGACCCAATCCTTTACCAACATCTA???????????????????????????????????????????????????????????????????????????????????????????????????????????????????????????????????????????????????????????????????????????????????????????????????????????????????????????????????????????????????????????????????????????????????????????????????????????????????????????????????????????????????????????????????????????????????????????????????????????????????????????????????????????????????????????????????????????????????????????????????????????????????????????????????????????????????????????????????????????????????????????????????????????????????????????????????????????????????????????????????????????????????????????????????????????????????????????????????????????????????????????????????????????????????????????????????????????????????????????????????????????????????????????????????????????????????????????????????????????????????????????????????????????????????????????????????????????????????????????????????????????????????????????????????????????????????????????????????????????????????????????????????????????????????????????????????????????????????????????????????????????????????????????????????????????????????????????????????????????????????????????????????????????????????????????????????????????????????????????????????????????????????????????????????????????????????????????????????????????????????????????????????????????????????????????????????????????????????????????????????????????????????????????????????????????????????????????????????????????????????????????????????????????????????????????????????????????????????????????????????????????????????????????????????????????????????????????????????????????????????????????????????????????????????????????????????????????????????????????????????????????????????????????????????????????????????????????????????????????????????????????????????????????????????????????????????????????????????????????????????????????????????????????????TTGGACAAAGGCACTGTGGTTCAAATGGATGC---AGCAATTCCAATGGCAGAAAGTCCACTTCTGACAGAAACAGCCTTAAAGGACAAAAAGCAGGCTCTTGAAAAAGATGCTGACAACCTGAAAATGCAAGAAAATGCAGCTCATCAAGCAAACCTGCACCAGCTCTGTCGCATCTGTGGAGTTTCATTTAAAACTGATCGCTACAAGAGAAGTCATCCAGTGCATGGACCAGTGGACAGTGAAACTCAGGGACTTCTGACAAAGAAAGAGAAAAGAGCAACATCTTGGCCAGATCTTATTGCCAAGGTTTTTAACATTGACGTGCGAGGTGATATTGACACAATCCACCCCACTCGGTTTTGTCACAACTGCTGGAACATTATCCATAGAAAGTTCAGCAATGCACCATGTGAAGTGTATTTCCCGAGGAACAGCACCATGGAGTGGCAGTCCCATTCCCCGAGCTGCACTGTTTGTTACACTGCTCATCGTGGGGTCAAGAGAAAGAACCACCCATCCAACTTACAGCTCAGCAAAAGGTTCAAGATCATTGCAGAACGTGCCCGAAAAACTAAAAGTGTAAAAAAC---CAAGCACAGGTAAACAACAAAAACCTTATGAAAAAGATTGCCAACTGCAAAAAGATACATCTTAGCACTAAACTTCTTGCAGTTGACTACCCTGCAGATTTCATTAATGTCCATCTCTTGCCAAGTCTGTGAGCATATTCTGGCAGATCCAGTGGAAACGACATGTAGCCACTTGTTCTGCAGAACCTGCATCCTGAAGTGCCTCAAAGTTATGGGCAGCTATTGCCCCTC--------------------CTACCGACTTGGAGAGCCCAGTGAAATCCTTCCTGAACATCCTCAATTCCCTGGCTGTGCGATGCCCAGTGAAAGAATGTGATGAGGAGGTTTTGCTGGGAAAATACTGCCAACATTTGTCCAGCCACAAAGAGCTGAAAGGGAAAGAGATTTACACACACATAAATAAAGGCGGCAGACCAAGGCAACACTTACTGTCATTGACTAGGAGAGCTCAAAAGCATCGTCTGAGAGAACTCAAGATTCAAGTCAAAGCTTTTGCTGAGAAAGAAGAAGGAGGTGATATAAAGGCTGTGTGCCTAACTTTGTTCTTGCTGGCTCTCAGAGCAAGAAATGAACACAGACAAGCAGATGAGTTGGAAGCTATAATGCAAGGGAAGGGATCAGGGCTTCACCCAGCTGTTTGCTTGGCAATCCGAGTCAACACCTTTCTCAGCTGTAGCCAGTACCATAAAATGTACAGAACTGTGAAAGCCATAACTGGGAGGCAGATCTTCCAGCCACTGCATGCTCTCCGCACTGCTGAAAAGGCCCTCTTGCCAGGTTATCATCCATTTGAGTGGAAACCCCCTTTGAAAAATGTGTCCACTAATACAGAAGTGGGAATTATAGATGGGCTGTCAGGGCTGCCACACTCAGTTGATGACTACCCAGTAGACACAATTGCCAAGAGGTTTCGATATGATGCAGCCTTAGTTTCTGCCTTAATGGATATGGAGGAAGACATCTTGGAAGGGATGAAAGCCCAAGACCTGGATGACTACTTGAATGGTCCCTTCAGTGTGGTGGTGAAGGAGTCTTGTGATGGGATGGGAGATGTCAGTGAGAAGCATGGAAGTGGACCGGCTGTTCCTGAGAAGGCAGTTCGATTTTCTTTCACACTCATGAGCATCACTATAGCTCATGGCAATGAAAATGTAAGGATCTTTGAAGAAGCCAAGCCTAATTCAGAGCTGTGTTGCAAACCCCTGTGTCTTATGCTGGCTGATGAATCGGACCATGAGACACTGACAGCCATCCTGAGCCCTCTCATAGCAGAAAGAGAGACCATGAAAAACAGCATCCTGCTTCTTGAAATGGGAGGCATCCTCAGATCATTCAAATTCATCTTTAGAGGTACAGGGTATGATGAGAAACTTGTCCGTGAAGTGGAAGGCCTTGAAGCCTCAGGCTCTACTTACATCTGTACCCTTTGTGATGCAACCCGCCTGGAAGCCTCTCAGAACTTGGTCCTCCACTCCATAACAAGAAGTCATGCTGAAAATCTGGAGCGGTATGAGGTATGGAGGTCCAACCCATATAATGAATCTGTTGATGAGCTACGTGACAGGGTGAAGGGTGTTTCTGCCAAACCTTTTATTGAGACTGTTCCTTCCATAGATGCATTGCATTGTGACATCGGCAATGCGGCTGAGTTCTACAAGATATTCCAGTTTGAGATAGGTGAGGTGTACAAGAACCCTAACACATCTAAAGAAGAGAGGAAGAGGTGGCAGTCGACTCTTGACAAGCACCTCAGGAAGAAGATGAACCTGAAGCCCATAATGAGGATGAATGGAAACTTTGCTAGAAAGCTTATGAGCAAAGAGAC????????????????????????????????????????????????????????????????????????????????????????????????????????????????????????????????????????????????????????????????????????????????????????????????????????????????????????????????????????????????????????????????????????????????????????????????????????????????????????????????????????????????????????????????????????????????????????????????????????????????????????????????????????????????????????????????????????????????????????????????????????????????????????????????????????????????????????????????????????????????????????????????????????????????????????????????????????????????????????????????????????????????????????????????????????????????????????????????????????????????????????????????????????????????????????????????????????????????????????????????????????????????????????????????????????????????????????????????????????????????????????????????????????????????????????????????????????????????????????????????????????????????????????????????????????????????????????????????????????????????????????????????????????????????????????????????????????????????????????????????????????????????????????????????????????????????????????????????????????????????????????????????????????????????????????????????????????????????????????????????????????????????????????????????????????????????????????????????????????????????????????????????????????????????????????????????????????????????????????????????????????????????????????????????????????????????????????????????????????????????????????????????????????????????????????????????????????????????????????????????????????????????????????????????????????????????????????????????????????????????????????????????????????????????????????????????????????????????????????????????????????????????????????????????????????????
Chelus_fimbriata		CCCCAAACACAGATTTTTCTACCA---CATAAAAATCCGCCAGAGAA-CTACCAACCCTATATTAGAAACTCAAAGGACTTGACGG-TGTCTCAAA-CCCAACTAGAGGAGCCTGTCCCAAAACCGATAATCCACGATACACCTAACCACTTCTAGCCC--ACAGCCTATATACCTCCGTCTCCAGCCTACCTTATGAAAGCAC-AAAAGTAGGCACAACAGTTAACCA--A--CTAACAAGTCAGGTCAAGGTGTAGCCAA-TGAAATGGTGGAGATGGGCTACATTTTCTACAA--TAGAAACATATTACACTGACAGAACGGATTTTGAAA--CTAAACCCGAAAAAGAAGGATTTAGCAGTAATGTA-AGAATAGAGAGCTTACATTAACCAGGACCTGA-GACGCGTACACACCGCCCGTCACCCTCGTCAAAAA?AGGGGTGATGCCTGCCCAGTGACACAGTTCAACGGCCG-CGGTATCCTGACCGTGCGAAGGTAGCATAATCGCTCGTCTTTTAAATAAAGACTGGAATGAATGGCTAAACGAG-GATCTATCTGTCTCTTATAGG-TAATCAATGAAATTGATCTACTCGTGCAAAAGCGAGAATGATAACATAAGACGAGAAGACCCTGTGGAACTTAAAAT-AACAGTTAAAGGATG-TAAATTATAT-----AATCCAACA-GG-AATACCAACTACAACCTAT--TTAACCCTA-TTTTTGGTTGGGGTGACCTCGGAGAAAAGAAAAACCTCCGAAAA-CTTAA----------TGCCAAGA-ACAACGGACCAAAGCA--CCATAGGTGTAAACGATCCAATATATTTGATCAATGAACAAAGCTACCCCAGGGATAACAGCGCAATCCCCTCTTAGAGT-CCCTATCAACGATGGGGGTTTACGACCTCGATGTTGGATCAGGACATCCTAATGGTGCAGCCGCTATTAAGGGTTCTTTACCTAATCTTTGGGGCCTGAGCAGGAATAATTGGAACAGCCTTAAGCCTACTAATTCGAACAGAGCTAAGCCAACCCGGACCACTCATAGGAGATGATCAAGTATATAACGTTATTGTTACAGCCCATGCCTTCATTATAATCTTCTTCATGGTCATACCCGTAATGATCGGAGGGTTTGGAAACTGACTAGTCCCAATAATAATTGGAGCACCTGACATGGCATTTCCACGAATAAATAATATAAGTTTTTGACTCCTCCCCCCATCCCTATTACTCCTACTAGCCTCATCAGGAATTGAAGCAGGAGCTGGAACAGGATGAACTGTGTACCCCCCTCTCGCTGGAAATATAGCACATGCCGGAGCCTCCGTAGACCTAACCATCTTTTCCCTACACCTAGCCGGAGCATCATCCATCCTAGGGGCCATCAATTTTATCACCACAGCAGTTAACATAAAACCACCATCCATATCACAATATCAAACCCCACTCTTCGTATGATCCGTACTAATCACTGCTGTACTGTTACTACTATCCCTACCAGTACTCGCAGCAGGAATTACAATACTACTAACAGATCGAAACCTAAACACCACTTTCTTCGACCCATCCGGTGGAGGAGACCCAATCCTTTACCAACACCTATGACTTCCAAAAGCACACGTAGAGGCTCCAATTGCTGGATCAATAGTTCTTGCCGCCGTATTACTAAAACTAGGGGGATACGGAATTATTCGAATATCATCAATCCTAAATTCA-CCTTTCAAAAACCTATCCTACCCATTCATAATCTTAGCCCTATGGGGCATCATTATAACCAGCCTAACCTGCCTTCGACAAACAGACCTAAAATCTATAATCGCCTACTCATCCATTGGCCATATAGGACTAGTAATTACAGCCACACTAATTCAAACCTCATGAGCACTCACTGGGGCTACCACCCTAATAATTGCCCACGGCCTAACATCATCCATACTATTCTGCCTATCAAACACAAACTATGAACGAACTAATAGCCGAATCCTACTCATAACCCGAAACATACAATCCATCCTACCCCTAATAACCATATGATGACTAATTGCCAGCCTAACTAACATAGCTCTACCACCAACCATCAACTTAATTGGAGAACTATATATTATTACCTCACTATTCAACTGATCCAACATTACAATCCTAATTACAGGATTTGGCACCGTAATCTCAGCCACCTACACACTATACATATTCTCATCTACTCAGTGATCAGGAGATTTACCAACAAGT---ATAATAACCATTCCACCCACACAAACACGAGAACACTTAATCATAACCCTACACGTACTACCAATAACAATACTAATAATTAAACCACAATTAATTTCAACAATATTCT???????????????????????????????????????????????????TAAAAAACACGAACGCACTATCAAAAACCATTAACAATGCCCTAATAAACCTTCCTAGCCCCTCCAACATTTCAACCATATGAAATTTTGGCTCACTACTAGGAACATGCCTAGCCCTACAACTAACCACAGGCATCTTCCTAGCCATACATTATTCATCAGACATTTCCCTAGCATTCTCATCAATCTCCCACATTCAACGAAACGTGCAATACGGATGATTAATTCGAAATATACACGCAAACGGAGCATCACTATTTTTCATCTGTATGTACCTGCACATCGGACGAGGCATCTACTATGGCTCTTACCTATACAAGAAAACCTGAAATACAGGAGTAATCCTACTCTTACTAGTCATAGCTACTGCATTCATGGGCTACGTCCTACCATGAGGACAAATATCATTTTGAGGGGCCACAGTAATCACCAATCTACTATCAGCCCTACCATACATCGGACACACTATAGTAACATGAATCTGAGGAGGATTCTCAGTAGACAATGCCACTCTAACCCGATTCTTTACACTACACTTCATAATACCCTTCATCATCCTAGGGATGATATTAGTACACCTACTATTCCTACATGAAACAGGTTCAAACAACCCAACAGGATTAAACTCCAACTGCGACAAAATTCCCCTTCACCCATATTTTTCTTACAAAGACCTTATAGGTATTGCTGTGATAATAACTTGCCTACTAACCCTAACATTACTATTCCCATTCTTACTTACTGACCCAGATAACTTCACCCCAGCCAACCCGCTAACCACACCTCCACATATTAAACCCGAATGGTACTTCCTATTTGCTTACGCTATCCTACGATCAATCCCAAACAAACTGGGGGGAGTCACAGCCCTATTACTTTCAATCCTAATCTTATTACTCATACCCACCCTACACCTATCAAAACAACGAACCTCCATATTCCGACCAATAACCCAAACCATATTCTGATGTCTAACAGCAGACCTACTCATCCTTACATGAATTGGCGGCCAACCAGTAGAAAACCCATTCATTTTAATCGGACAAGTAGCCTCCACATTATATTTCGCAATCATCCTAATCATCATACCACTCACACAATTAATTGAAAACAA--AATAACAAACTGCAAATAAAGAGAAAGCAGAGGAGATGGCCTCTTTGGACAAAGGCACCGTGGTGCAGATGCATGC---GGCAGTTCCAACGGTAGAAAAGCCACTTCTGGAAGAAACAGCCTTAAAGGACAATAAGCAGGCTCTTGCAAAAGATGCTGACAACCTGAAAATGCAAGACAATGCAGCTCATCAAGCAAACCTGCAGCAGCTCTGTCGCATCTGTGGAGTTTCATTTAAAACTGATCGCTACAAAAGAAGTCATCCAGTGCATGGACCAGTGGACAGTGAAACTCAAGGACTTCTGAGAAAGAAAGAGAAAAGAGCAACATCTTGGCCAGATCTTATTGCCAAGGTTTTTAAGATTGACGTGCGAGGTGATATTGACACAATCCACCCCACTCGGTTTTGTCACAACTGCTGGAGCATCATCCATAGAAAGTTCAGCAATGCACCATGTGAAGTGTATTTCCCGAGGAACAGCACCATGGAGTGGCAGTCCCATTCCCCGAGCTGCACTGTTTGTTACATTGCTCATCGTGGGGTCAAGAGAAAGAACCAGCCATCCAACTTACAGCTCAGCAAAAGGCTCAAGATCATTGCAGAACGTGCCCGAAAAACTAAAAATGTAAAAAAA---CAAGCACAGGTAAACAACAAAAACCTTATGAAAAAGATTGCCAACTGCAAAAAGATACATCTTAGCACTAAACTTCTTGCAGTTGACTACCCTGCAGATTTCATTAA-GTCCATCTCTTGCCAAATCTGTGAGCATATTCTGGCAGATCCAGTGGAAACGACATGTAGCCACTTGTTCTGCAGAACCTGCATCCTGAAGTGCCTCAAAGTTATGGGCAGCTATTGCCCCTCCTGCCAATACCCTTGCTTCCCTACCGACTTGGAGAGCCCAGTGAAATCCTTCCTGAACATCCTCAATTCCCTGGCTGTGCGATGCCCAGTGAAAGAATGTGATGAGGAGGTTTTGCTGGGAAAATACTGCCAACATTTGTCCAGCCACAAAGAGCTGAAAGGTAAAGAGATTTACACACACATAAATAAAGGCGGCAGACCAAGGCAACATTTACTGTCATTGACGAGGAGAGCTCAAAAACATCGTCTAAGAGAACTCAAGCTTCAAGTCAAAGCTTTTGCTGAGAAAGAAGAAGGAGGTGATATAAAGGCTGTGTGCCTAACTTTGTTCTTGCTGGCTCTCAGAGCAAGAAATGAACACAGACAAGCAGATGAGTTGGAAGCTATAATGCAAGGGAAGGGATCAGGGCTTCACCCGGCTGTTTGCCTGGCAATCCGAGTCAACACCTTTCTCAGCTGTAGCCAGTACCATAAAATGTACAGAACTGTAAAAGCCATAACTGGGAGGCAGATCTTCCAGCCACTCCATGCTCTCCGCACTGCTGAAAAGGCCCTCTTGCCAGGTTATCATCCATTTGAGTGGAAACCCCCTTTGAAAAATGTGTCCACTAATACAGAAGTGGGAATTATAGATGGGCTGTCAGGGCTGCCACACTCAGTTGATGACTACCCAGTAGACACAATTGCTAAGAGGTTTCGATATGATGCAGCCTTAGTTTCTGCCTTAATGGACATGGAGGAAGACATCTTGGAAGGGATGAAAGCCCAAGACCTGGATGACTACTTGAATGGTCCCTTCACTGTGGTGGTGAAGGAATCTTGTGATGGGATGGGAGATGTCAGCGAGAAGCATGGAAGTGGACCGCCTGTTCCCGAGAAGGCAGTTCGATTTTCTTTCACGCTCATGAGCATCACAATAGCTCATGGCAATGAAAATGTAAGGATCTTTGAAGAAGCCAAGCCTAATTCAGAGCTGTGTTGCAAACCCCTGTGTCTTATGCTAGCTGATGAATCAGACCATGAGACACTGACAGCCATCCTGAGTCCTCTCATAGCAGAAAGAGAGACCATGAAAAACAGTGTCCTGCTTCTTGAAATGGGAGGCATCCTCAGAACATTCAAATTCATCTTTAGAGGTACAGGGTATGATGAGAAACTTGTCCGTGAAGTGGAAGGCCTTGAAGCCTCAGGCTCTACTTACATCTGCACCCTTTGTGATGCAACCCGCCTGGAAGCCTCTCAGAACTTGGTCCTCCACTCCATAACAAGAAGTCATGCTGAAAACCTGGAGCGGTATGAGGTATGGAGGTCCAACCCATATCATGAATCTGTTGATGAACTACGTGACAGAGTAAAGGGTGTTTCTGCCAAACCTTTCATTGAGACTGTTCCTTCCATAGATGCATTGCATTGTGACATTGGCAATGCAGCTGAGTTCTACAAGATATTCCAGTTTGAGATAGGTGAGGTGTACAAGAACCCTAACACATCTAAAGAAGAGAGGAAGAGGTGGCAGTCGACTCTTGACAAGCACCTCAGGAAGAAGATGAACCTGAAGCCCATAATGAGGATGAATGGAAACTTTGCTAGAAAGCTTATGACCAAAGAGACAGTGGAAGCAGTCTGTGAATTAATAACGGGTGAGGAAAGGCATGAAGCCCTAAGAGAACTGATGGACCTTTACCTTAAGATGAAACCAGTGTGGAGGTCTTCATGCCCAGCCAAAGAGTGCCCAGAACTGCTGTGTCAGTATAGCTTCAACTCACAACGTTTTGCTGAGCTCCTGTCCACAAAGTTCAAGTACAGATATGAGGGCAAGATTACAAATTACTTTCACAAAACTCTTGCTCATGTTCCTGAAATCATTGAAAGAGATGGCTCCATTGGGGCCTGGGCAAGTGAAGGGAACGAGTCTGGGAACAAACTGTTTAGGCGTTTCTGCAGCAAGAACCGGCTGGCATCGCGACAAAGCTTCTGGGCTGAGCTGAATGTGGCCCGGCTACACCATCCTAATGTGGTACGTGTTGTAGCTGCCAGCACTAGTGCCCCTGCCAACCAAGACAGCCTGGGCACCATAATCATGGAATATGCTGGCTACATTACCCTGCACCATGTCATCTATGGCACTGGTTGCCTGCAGGGA------GAGGATGACATGGGTGGACATGGCAAGGAACCCTTAAGCGTTGCTGAATCCCTGGGTTATTCCTCTGATATTGTGACTGGCTTAGTCTTCCTCCACTCACAGTGCGTTGTGCACCTGGACCTGAAGCCTGCTAATGTATTCATCACTGAGCAGGG???????????CTTTGCATATTTGTAATGATTTATTTAAATAAGGAG-TGAGTGTGTGTGATATTAATTGAAGCAGAGATGCACGCTAGTTATATAGCAGTTATGAACAGCATAAATCATATCCATAAAAGTCATTTCAAACAGATCTGTGTTTCAGTGAATGTATTTATCTGGCTTTCAGCAGGATTGAAATATTCATAAAAATCATTGCATTTTAAAAATGAAAAGCCAGATTCATCATTGTTGTTCCAGTTTTACATTAGCGTAACTCCACTGAACCCAGCATAGAGTTAGGTTAGTGATAGGGGTGAATCGGATCCAATGTTTTGTGTTTCAAGCAATCTGGCAGGCATTAGATTGACTCTGAGAGATCTGTGAGTTTTACTAAGGCAGATTTTTTTCC-TCCATCCTCACAGTTCTGAGTCACACCCTTTGCCAGTCATCTCTGGGTAAGAAACTGAAGCTTGTCTGAGAAGTGAGGAAGAATGTTTATATCTTTGTAATTATTGAAGCATTACTACTACATTTTGGTGCAATGTATGGAAAGGATTAATATAACAAAGGATACTTACAAGTGAGTCCTTTGCTGGGCACGTGAACGTGTTGGGAATTGTTAAGCGTCATTTTTGTCCTATGGATGTGTCTGGAGTCAGCGTTTCAGCTCCTTTCCATGAAGAATGAGAATTATAATGCATATGAAGCCAGGTCCTGCTTGGCACTGAGTGCCCTC-AAACCCCATTGACTTTGAGAGTCACAGATGTTCAGCATCTC--ACCGGATTGGCTCAATGGTCATCTAAGAATTGTTTAGAATCAGAGCTGCTTCTTTGGCAGACCTCATGCATCAATATTTATCATTTCATTTGCAGCATAAGGCATTCTGAGAAATACAGAGAGGGGGGG--AAAGGGGCTGTAT-GAGGACATTTGTCTTCTAGCATCTGTCAAAGTCACAAAGCTTAACAGGAATCAATGCAAATCTGTGACTTCTATTTTTGTCATATTAAAAGTGTGAAGTTTTTGTTATTCCTGGAAATATATTATGTGACTGAAGTGATTTAATTTCTTAATGTTCTGTCTTTCAGA????????????????????????
Phrynops_hilarii		CCCTAAACATAGATTTTTTCCCAT--ACATAAAAATCCGCCAGAGAA-CTACCAACCACGCATTTGAAACTCAAAGGACTTGGCGG-TGTCTCAAA-TCCAACTAGAGGAGCCTGTTCTACAACCGATAATCCACGATTTACCTCACCACCCCTAGCCA-ATCAGCCTATATACCTCCGTCTTCAGCCTACCTTATGAAAGAAC-AAAAGTAGGCACAATAGTCAAAAAACA--CTAACAAGTCAGGTCAAGGTGTAGCCAA-TGAGGTGGAAGAAATGGGCTACATTTTCTACCA--TAGAAATAC-CCCTAAC---GGAATGGATCATGAAA--CAAGACCC-AGAAAGCAGGATTTAGTAGTAATGTA-AGAATAGAGAGCCTACATTAATTAGGACCTGA-GACGCGCACACACCGCCCGTCACCCTCATCAAAAA?AGGGGTGATGCCTGCCCAGTGACATTGTTCAACGGCCG-CGGTATTCTGACCGTGCGAAGGTAGCGTAATCACTTGTCTTTTAAATAGAGACTGGAATGAATGACTAAACGAG-GCTCTATCTGTCTCCTACAGG-CGATCAGTGAAATTGATCTCCTCGTGCAAAAGCGAGAATGGTAACATAAGACGAGAAGACCCTGTGGAACTTTAAAT-AACAGCTAATAGCCA-TAAACCCACT-----AAACCGATA-GG-ACCACTA-CTATGGCCACT-CTTAGCTCTA-TTTTCGGTTGGGGTGACCTCGGAGNAAAACGCAACCTCCGAAGA-CCTA-----------TACTAAGA-ACAACAAACCAAAGTG-CCTCCGGCT--AAACGATCCAATATATTTGATTAATGAACCAAGCTACCCCAGGGATAACAGCGCAATCCCCTCTTAGAGT-CCATATCAACGATGGGGGTTTACGACCTCGATGTTGGATCAGGACATCCTAATGGTGCAGCCGCTATTAAGGGTTCTTTACTTGATCTTTGGTGCCTGAGCAGGAATAGTTGGAACAGCCCTCAGCTTACTAATTCGAACAGAACTAAGCCAACCAGGACCCCTCATAGGAGACGACCAAGTATATAATGTTATCGTCACAGCCCACGCCTTTGTCATAATTTTCTTCATGGTTATGCCAGTAATAATCGGGGGATTTGGCAACTGACTGGTCCCAATAATAATTGGAGCACCAGACATGGCATTCCCACGAATAAACAACATAAGCTTCTGACTGCTCCCACCATCACTACTCCTCCTTCTAGCCTCATCAGGAATCGAAGCTGGGGCAGGAACAGGGTGAACCGTATACCCACCCCTAGCTGGAAATATAGCACATGCCGGTGCCTCTGTGGACTTGACCATCTTTTCACTTCATCTAGCCGGAGCATCATCAATCTTAGGCGCTATCAACTTCATCACTACAGCAATTAACATAAAAACCCCATCCATGTCCCAATACCAAACTCCACTCTTCGTATGATCAGTGCTCATTACAGCCGTATTATTACTACTATCCCTACCAGTACTTGCTGCAGGAATCACTATACTCCTAACAGACCGAAATTTAAATACAACCTTCTTTGACCCGTCTGGAGGTGGAGATCCAATCCTCTACCAACACTTATGACTACCCAAAGCACACGTAGAGGCCCCAATTGCCGGATCAATAGTACTTGCCGGCGTACTGCTGAAACTAGGAGGATATGGCATCATCCGAATATCATCAATCATCACCCCA-CCATCCAAAGACCTATCCTACCCATTCATAATTCTAGCCCTATGAGGCATCATCATAACTAGCCTAATCTGCCTCCGACAAACAGACCTAAAATCACTAATCGCCTACTCATCAGTCAGCCACATAGGACTAGTAATCTCCGCCACACTCATCCAAACTCCATGAGCACTAGCTGGAGCCACCACCCTGATAATCGCCCACGGCCTGACATCATCAATACTATTTTGCCTCTCCAATACAAACTACGAACGAACAAACAGCCGAGTCCTAATTATCACCCGAAACCTACAACTATTACTACCATTAATAACCCTCTGATGACTATTCGCCAGCCTAACCAACATAGCCCTGCCACCAACCATCAACTTAATAGGAGAACTACCTATTATCGCTTCCCTATTCAACTGATCCAAAATCACAATCTTAATCACAGGACTAGGCACCGTAATCTCTGCCGCCTACACACTATACATATTCTCATCTTCACAATGAGGGGGAGAATTTCCATCAAANCATNTAAAAACCATCCCTCCCACCCACACACGAGAACACCTAGTAATAACTCTCCACCTACTACCAATAATCCTGCTAATAATAAAACCCCAACTAATCTCAAATATGTTTT???????????????????????????????????????????????????TAAAAAACACTAACCCACTATTAAAAATTATAAGCAACGCCCTAATCAGCCTCCCAGCCCCATCCAACATTTCAGCCCTATGAAACTTCGGCTCCCTGCTAGGAGCATGCCTTGCGCTACAATTAGCCACAGGAGTTTTCCTAGCCATACACTACTCATCTGATATTTCCACAGCATTCTCATCAATCTCCCACATCCAACGAGATGTCCAATATGGCTGGCTAATCCGAAACATACATGCAAATGGGGCCTCACTATTTTTCATTTGCATGTACTTGCACATCGGACGAGGAGTCTACTACGGATCATACCTATACAAAAAAACCTGAAATACAGGGGTAGTACTACTCCTTCTAGTCATAGCTACTGCGTTCGTTGGCTATGTCCTGCCATGAGGACAAATATCATTCTGAGGGGCTACAGTAATCACCAACCTCCTATCAGCCCTCCCCTACATTGGGCACTCCATAGTAGAATGGATCTGAGGCGGATTTTCCGTAGACAACGCCACCCTGACCCGATTCTTTACATTTCACTTCCTCATCCCATTCATCATCGCAGGCATAATAATAGTACACCTTTTATTCCTACACGAAACAGGCTCAAATAATCCCACAGGACTAAACTCCAACTGCGACAAAATCCCATTCCACCCATACTTCTCCTACAAAGACCTCCTGGGACTCATTATAATACTAACCTGCCTACTAAGCCTAGCCCTATTCCTACCAAACCTACTGGGCGACCCAGACAACTTCACCCCAGCCAACCCACTTGTCACCCCACCGCACATCAAACCAGAATGGTACTTCCTATTCGCCTACGCCATCCTACGATCCATCCCCAACAAGCTCGGAGGCGTCCTAGCCCTACTACTATCAATCATAGTCCTACTTCTAATACCCTCCCTCCACACATCAAAACAACGAACCACCACATTCCGACCAATATCTCAAATCACATTCTGACTCCTAGTAGCAGACCTACTCATCCTAACATGAATTGGGGGCCAACCAGTAGAAGACCCGTTCATCCTCATCGGACAAGTAGCCTCCGCACTATACTTCTCAACCATCCTTATTATCATGCCACTCACAAACCTAACTGAAAATAA--AATAATAAACT?????????????????????????????????????????????????????????????????????????????????????????????????????????????????????????????????????????????????????????????????????????????????????????????????????????????????????????????????????????????????????????????????????????????????????????????????????????????????????????????????????????????????????????????????????????????????????????????????????????????????????????????????????????????????????????????????????????????????????????????????????????????????????????????????????????????????????????????????????????????????????????????????????????????????????????????????????????????????????????????????????????????????????????????????????????????????????????????????????????????????????????????????????????????????????????????????????????????????????????????????????????????????????????????????????????????????????????????????????????????????????????????????????????????????????????????????????????????????????????????????????????????????????????????????????????????????????????????????????????????????????????????????????????????????????????????????????????????????????????????????????????????????????????????????????????????????????????????????????????????????????????????????????????????????????????????????????????????????????????????????????????????????????????????????????????????????????????????????????????????????????????????????????????????????????????????????????????????????????????????????????????????????????????????????????????????????????????????????????????????????????????????????????????????????????????????????????????????????????????????????????????????????????????????????????????????????????????????????????????????????????????????????????????????????????????????????????????????????????????????????????????????????????????????????????????????????????????????????????????????????????????????????????????????????????????????????????????????????????????????????????????????????????????????????????????????????????????????????????????????????????????????????????????????????????????????????????????????????????????????????????????????????????????????????????????????????????????????????????????????????????????????????????????????????????????????????????????????????????????????????????????????????????????????????????????????????????????????????????????????????????????????????????????????????????????????????????????????????????????????????????????????????????????????????????????????????????????????????????????????????????????????????????????????????????????????????????????????????????????????????????????????????????????????????????????????????????????????????????????????????????????????????????????????????????????????????????????????????????????????????????????????????????????????????????????????????????????????????????????????TGCAGCAAGAACCGGCTGGCATCGCGACAAAGCTTCTGGGCTGAGCTGAATGTGGCCCGGCTACACCATCCCAATGTGGTACGTGTTGTAGCTGCCAGCACTTGTGCCCCTGCCAACCAAGACAGCCTGGGCACCATAATCATGGAATATGCTGGCTGCACTACCCTGCACCATGTCATCTATGGCACTGGTTGCCTGCAGGGAAAGGGAGAGGATGACGGGGGTGGACATGGCAAGGAACCCTTAAGCATTGCTGAATCCCTGGGTTATTCCTCTGATATTGTGACTGGCTTAGTCTTCCTCCACTCACAGTGCGTTGTGCACCTGGACCTGAAGCCTGCTAATGTATTCATCACCGAGCAGGG???????????????????????????????????????????????????????????????????????????????????????????????????????????????????????????????????????????????????????????????????????????????????????????????????????????????????????????????????????????????????????????????????????????????????????????????????????????????????????????????????????????????????????????????????????????????????????????????????????????????????????????????????????????????????????????????????????????????????????????????????????????????????????????????????????????????????????????????????????????????????????????????????????????????????????????????????????????????????????????????????????????????????????????????????????????????????????????????????????????????????????????????????????????????????????????????????????????????????????????????????????????????????????????????????????????????????????????????????????????????????????????????????????????????????????????????????????????????????????????????????????????????????????????????????????????????????????????????????????????????????????????????????????????????????????????????????????????????????????
Acanthochelys_radiolata		?????????????????????????????????????????????????????????????????????????????????????????????????????????????????????????????????????????????????????????????????????????????????????????????????????????????????????????????????????????????????????????????????????????????????????????????????????????????????????????????????????????????????????????????????????????????????????????????????????????????????????????????????????????????????????????????GTGATGCCTGCCCAGTGACATTGTTCAACGGCCGGCGGTATCCTGACCGTGCGAAGGTAGCGTAATCACTTGTCTTTTAAATAAAGACTGGAATGAATGGCTAAACGAG-GCTTTATCTGTCTCTTACGGG-CAATCAGTGAAATTGATCTCCTCGTGCAAAAGCGAGAATAATAACATAAGACGAGAAGACCCTGTGGAACTTCAAAT-ATTAGCTAAAGACCAT-AAACCTAC------AAACCAATA-GG-ACCACCAACCATGACCCTTACTTAGCCTTA-TTTTCGGTTGGGGTGACCTCGGAGGAAAACAAAACCCCCGAAAA-CATA-----------TACCAAGA-ATGACAAGCCAAAGTG-CCTACGGCT--AAACGATCCAATACATTTGATTAATGAACCAAGCTACCCCAGGGATAACAGCGCAATCCCCTCTTAGAGT-CCCTATCAACGACGGGGGTTTACGACCTCGATGTTGGATCAGGACATCCTAATGGTGCAGCCGCTATTAAGG????TTTACCTAATTTTTGGTGCCTGAGCAGGAATAATTGGAACAGCCCTTAGCCTTCTAATCCGAACAGAACTAAGCCAACCGGGCCCACTTATAGGAGACGACCAAGTATACAATGTCATTGTCACTGCCCACGCCTTTATCATAATCTTCTTCATAGTTATACCAGTAATGATCGGAGGATTTGGAAATTGACTAGTCCCAATAATAATTGGAGCACCAGACATGGCATTCCCACGAATAAATAACATAAGCTTTTGACTCCTACCACCATCACTACTCCTACTTCTAGCCTCATCAGGAGTAGAAGCTGGGGCGGGAACAGGATGAACCGTGTACCCACCCCTAGCTGGAAATATAGCACACGCTGGCGCTTCTGTAGACCTAACTATCTTTTCTCTACACTTAGCCGGAGCATCATCAATCCTAGGCGCTATCAACTTTATTACTACAGCAATTAACATAAAAACCCCATCCATATCACAATACCAAACTCCACTATTCGTATGATCAGTACTAATCACAGCCGTATTATTACTACTTTCCCTACCAGTACTTGCAGCAGGAATCACCATACTCCTAACAGACCGAAATCTAAACACAACTTTCTTTGACCCATCTGGAGGCGGAGACCCAATTCTTTATCAACACCTATGACTACCAAAAGCTCATGTAGAAGCCCCAATYGCCGGATCAATAGTACTTGCTGGCGTACTCCTAAAACTAGGAGGATACGGCATCATCCGAATATCATCAATCCTAACTCCA-CCATCTAAAGACCTATCTTACCTATTCATAATCCTAGCCCTATGGGGCATCATCATAACCAGCTTAATCTGCCTTCGACAAACAGACCTAAAATCACTAATCGCCTACTCATCAGTCAGCCACATAGGACTAGTAATTGCTGCTACACTTATCCAAACCCCATGAGCACTAACCGGAGCCACCACCTTAATAATTGCCCACGGCCTAACATCATCAATATTATTTTGCCTCTCCAATACAAACTATGAACGCATGAACAGCCGAATCTTACTCATCACCCAAAACCTTCAATTATTACTACCACTAATAACACTATGATGACTACTTGCTAGCCTAACTAACATAGCTCTACCACCAACCATTAACCTAACAGGAGAACTATCCGCTATCACCTCCCTATTCCACTGATCTAAAACCACCATCTTAATCACAGGATTAGGTACCGTAATCACCGCCACCTATACACTATATATATTTTCATCTACACAATGAGGGGGAGAATTTCCATCCAAC---ATTAAAACTATCCCACCTACTCATACACGAGAACACCTGATTATGGTTCTTCACCTACTACCAACAGCCCTACTAGTAACCAAACCCCAACTAATCTCAAGTATATTT????????????????????????????????????????????????????????????????????????????????????????????????????????????????????????????????????????????????????????????????????????????????????????????????????????????????????????????????????????????????????????????????????????????????????????????????????????????????????????????????????????????????????????????????????????????????????????????????????????????????????????????????????????????????????????????????????????????????????????????????????????????????????????????????????????????????????????????????????????????????????????????????????????????????????????????????????????????????????????????????????????????????????????????????????????????????????????????????????????????????????????????????????????????????????????????????????????????????????????????????????????????????????????????????????????????????????????????????????????????????????????????????????????????????????????????????????????????????????????????????????????????????????????????????????????????????????????????????????????????????????????????????????????????????????????????????????????????????????????????????????????????????????????????????????????????????????????????????????????????????????????????????????????????????????????????????????????????????????????????????????????????????????????????????????????????????????????????????????????????????????????????????????????????????????????????????????????????????????????????????????????????????????????????????????????????????????????????????????????????????????????????????????????????????????????????????????????????????????????????????????????????????????????????????????????????????????????????????????????????????????????????????????????????????????????????????????????????????????????????????????????????????????????????????????????????????????????????????????????????????????????????????????????????????????????????????????????????????????????????????????????????????????????????????????????????????????????????????????????????????????????????????????????????????????????????????????????????????????????????????????????????????????????????????????????????????????????????????????????????????????????????????????????????????????????????????????????????????????????????????????????????????????????????????????????????????????????????????????????????????????????????????????????????????????????????????????????????????????????????????????????????????????????????????????????????????????????????????????????????????????????????????????????????????????????????????????????????????????????????????????????????????????????????????????????????????????????????????????????????????????????????????????????????????????????????????????????????????????????????????????????????????????????????????????????????????????????????????????????????????????????????????????????????????????????????????????????????????????????????????????????????????????????????????????????????????????????????????????????????????????????????????????????????????????????????????????????????????????????????????????????????????????????????????????????????????????????????????????????????????????????????????????????????????????????????????????????????????????????????????????????????????????????????????????????????????????????????????????????????????????????????????????????????????????????????????????????????????????????????????????????????????????????????????????????????????????????????????????????????????????????????????????????????????????????????????????????????????????????????????????????????????????????????????????????????????????????????????????????????????????????????????????????????????????????????????????????????????????????????????????????????????????????????????????????????????????????????????????????????????????????????????????????????????????????????????????????????????????????????????????????????????????????????????????????????????????????????????????????????????????????????????????????????????????????????????????????????????????????????????????????????????????????????????????????????????????????????????????????????????????????????????????????????????????????????????????????????????????????????????????????????????????????????????????????????????????????????????????????????????????????????????????????????????????????????????????????????????????????????????????????????????????????????????????????????????????????????????????????????????????????????????????????????????????????????????????????????????????????????????????????????????????????????????????????????????????????????????????????????????????????????????????????????????????????????????????????????????????????????????????????????????????????????????????????????????????????????????????????????????????????????????????????????????????????????????????????????????????????????????????????????????????????????????????????????????????????????????????????????????????????????????????????????????????????????????????????????????????????????????????????????????????????????????????????????????????????????????????????????????????????????????????????????????????????????????????????????????????????????????????????????????????????????????????????????????????????????????????????????????????????????????????????????????????????????????????????????????????????????????????????????????????????????????????????????????????????????????????????????????????????????????????????????????????????????????????????????????????????????????????????????
Mesoclemmys_zuliae		???????????????????????????????????TCCGCCAGAGTA-CTACTAATCATACATTAAAAACTCAAAGGACTTGACGG-TGCCTCAAA-CCCAACTAGAGGAGCCTGTTCTATAATCGATAATCCACGATTCACCTCACCACCCAAAGCCT-CTCAGCCTATATACCTCCGTCTTCAGCCTACCCTGTGAAAGTAT-AAAAGTAGGCACAATAGTTAATAAGCA--CTAACAAGTCAGGTCAAGGTGTAGCTAA-TGGGGTGGAAGAAATGGGCTACATTTTCTACCG--TAGAAATAA-TCTTA-C---GGAGGGCACTTTGAAA--CAAGGCCC-AATAAGCAGGATTTAGTAGTAATGTGTGGAGCAGAGAGCCTACATTAATTAGGACCTGA-GACGCGTACACACCGCCCGTCACCCTCATCAAAAA???????????????????????????????????????????????????????????????????????????????????????????????????????????????????????????????????????????????????????????????????????????????????????????????????????????????????????????????????????????????????????????????????????????????????????????????????????????????????????????????????????????????????????????????????????????????????????????????????????????????????????????????????????????????????????????????????????????????????????????????????????????????????????????????????????????????????????????????????????????????????????????????????????????????????????????????????????????????????????????????????????????????????????????????????????????????????????????????????????????????????????????????????????????????????????????????????????????????????????????????????????????????????????????????????????????????????????????????????????????????????????????????????????????????????????????????????????????????????????????????????????????????????????????????????????????????????????????????????????????????????????????????????????????????????????????????????????????????????????????????????????????????????????????????????????????????????????????????????????????AGCTCATGTAGAAGCTCCAATTGCCGGATCAATAGTGCTTGCAGGTGTACTCCTTAAGCTAGGCGGATATGGAATCATCCGAATATCATCAATCCTCAACCCC-CCATCAAAAACTCTATCCTACCCATTCATAATCCTAGCCCTCTGAGGCATTATTATAACTAGCCTAATCTGTCTTCGACAAACAGACCTAAAATCACTAATCGCCTACTCATCAGTCAGTCATATAGGACTTGTCATTGCTGCCACACTCATCCAAACCCCATGAGCACTCATAGGGGCCACCACCCTAATAATCGCCCACGGCCTAACATCCTCAATACTATTCTGTTTATCCAACACAAATTACGAACGGACAAATAGTCGAATTCTTCTCGTTACCCGAGGCCTGCAATCACTACTACCCCTAATAACCCTGTGATGACTATTCTCCAGCCTCACTAACATGGCCCTCCCACCAACCATCAACTTAATAGGAGAACTCTCCATCATTACCTCCCTATTCAACTGATCAAAACTTACCATCCTAATTACAGGAATAGGCACCGTAATTTCAGCTATCTATACACTATACATATTCTCAGCCACACAATGAGGAGGAAAACCCCCATCAAAT---ATTAAAACCATCCCCCCCACTCACACACGAGAGCACCTAATCATAGCCCTGCATCTACTACCCACAGCCCTACTCATAACCAAGCCCCAACTAATCTCAAACGTATTCTGCTGATATAGTTTCAAGCCAAACATTAGATTGTGGATCTAAAAATAGAAG????????????????????????????????????????????????????????????CCATCCAACATCTCAGCATGATGAAACTTCGGCTCCCTTCTTGGGGCATGCCTTGCGCTACAGCTAGCTACCGGAATTTTCCTAGCCATGCACTACTCCCCTAACATCTCCCTAGCATTCTCATCAATCACCCACATCCAACGAGATGTTCAATACGGCTGACTCATCCGAAATATACATGCAAACGGAGCCTCACTATTCTTCATCTGCATATACCTCCATATCGGACGCGGAGTATACTACGGCTCATACTTGTACAAAAAAACCTGAAACACAGGCGTAGCTCTACTTCTTCTAGTTATAGCTACCGCATTCATAGGGTACGTACTACCATGAGGACAAATGTCATTTTGAGGCGCTACAGTAATCACCAACCTCCTATCAGCCCTACCCTATATTGGACATACCATGGTTCAATGAATCTGAGGTGGATTTTCAGTAGACAACGCCACCTTAACCCGGTTCTTCACACTCCACTTCCTCATCCCATTTGCCATCGCAGCCATAGCAATAGTCCACCTCCTATTCCTCCATGAAACAGGTTCAAACAACCCAACAGGACTAAACTCCCACTGCGACAAAATCCCATTCCATCCATACTTCTCCTACAAAGACCTACTAGGACTCATTATCATACTAACCTGCCTACTAAACTTAGCCCTCTTCTCACCAAACCTACTAGGTGACCCGGACAATTTTACCCCAGCCAACCCCCTTGTCACCCCACCACATATTAAACCAGAGTGATATTTTCTATTCGCTTACGCCATCCTACGATCAATCCCCAACAAACTTGGGGGCGTCTTGGCCCTCTTATTCTCAATCCTTATTCTCCTTATAATACCCGCCCTCCACACATCAAAACAACGAACCTCTACATTCCGACCCATAGCCCAAATAACATTTTGATGCCTGACAGCAGACCTACTCATCCTAACATGAATCGGGGGCCAACCAGTAGAAGACCCATTCATCCTCATCGGACAAGTAGCCTCCGTAATGTATTTTACACTGATCCTTGTCGCCCTACCCCTTGTAAACCTAGTAGAAAACAA--AATGACAAACT?????????????????????????????????????????????????????????????????????????????????????????????????????????????????????????????????????????????????????????????????????????????????????????????????????????????????????????????????????????????????????????????????????????????????????????????????????????????????????????????????????????????????????????????????????????????????????????????????????????????????????????????????????????????????????????????????????????????????????????????????????????????????????????????????????????????????????????????????????????????????????????????????????????????????????????????????????????????????????????????????????????????????????????????????????????????????????????????????????????????????????????????????????????????????????????????????????????????????????????????????????????????????????????????????????????????????????????????????????????????????????????????????????????????????????????????????????????????????????????????????????????????????????????????????????????????????????????????????????????????????????????????????????????????????????????????????????????????????????????????????????????????????????????????????????????????????????????????????????????????????????????????????????????????????????????????????????????????????????????????????????????????????????????????????????????????????????????????????????????????????????????????????????????????????????????????????????????????????????????????????????????????????????????????????????????????????????????????????????????????????????????????????????????????????????????????????????????????????????????????????????????????????????????????????????????????????????????????????????????????????????????????????????????????????????????????????????????????????????????????????????????????????????????????????????????????????????????????????????????????????????????????????????????????????????????????????????????????????????????????????????????????????????????????????????????????????????????????????????????????????????????????????????????????????????????????????????????????????????????????????????????????????????????????????????????????????????????????????????????????????????????????????????????????????????????????????????????????????????????????????????????????????????????????????????????????????????????????????????????????????????????????????????????????????????????????????????????????????????????????????????????????????????????????????????????????????????????????????????????????????????????????????????????????????????????????????????????????????????????????????????????????????????????????????????????????????????????????????????????????????????????????????????????????????????????????????????????????????????????????????????????????????????????????????????????????????????????????????????????????TGCAGCAAGAACCGGCTGGCATCGCGACAAAGCTTCTGGGCTGAGCTGAATGTGGCCCGGCTACACCATCCCAATGTGGTACGTGTTGTAGCTGCCAGCACTTGTGCCCCTGCCAACCAAGACAGCCTGGGCACCATAATCATGGAATATGCTGGCTGCACTACCCTGCACCATGTCATCTATGGCACTGGTTGCCTGCAGGGAAAGGGAGAGGATGACGGGGGTGGACATGGCAAGGAACCCTTAAGCATTGCTGAATCCCTGGGTTATTCCTCTGATATTGTGACTGGCTTAGTCTTCCTCCACTCACAGTGTGTTGTGCACCTGGACCTGAAGCCTGCTAATGTATTCATCACCGAGCAGGG?????????????????????????????????????????????????????????????????????????????????????????????????????????????????????????????????????????????????????????????????????????????????????????????????????ATAAAAATCATGGCATTTTAAAAATGAAAAGCCAGATTCATCATTGTTGTTCCAGTTTTACATTAGCGTAACTCCACTGAACCCAGCATAGAGTTAGGCTAGTGATAGGGGTGAATCGGATCCAATGTTTTGTGTTTCAAGCAATCTGGCAGGCATTAGATTGACTCTGAGAGATCTGTGAGTTTTACTAAGGCAGATTTTTTTCC-TCCATCCTCACAGTTCTGAGTCACACCCTTTGCCAGTCATCTCTGGGTAAGAAACTGAAGCTTGTCTGAGAAGTGAGGAAGAATGTTTCAATCTTTGTAATTATTGAAGCATTACTAC---ATTTTGGTGCAATGTATGGAAAGGATTAATATAACAAAGGATACTTACAAGTGAGTCCTTTGCTGGGCACGTGAACGTGTTGGGAATTGTTAAGGGTCATTTTTGTCCTACGGATGTGTCTGGAGTCAGCCTTTCAGCTCCTTTCCATGAAGAATGAGAATTATAATGCATATGAAGCCCGGTCCTGCCTGGCACTGAGTGCCCCC-AAACCCCATTGACTTTGGGAGTCGCAGATGTTCAGCATCTC--ACCGGATTGGCTCAATGGTCGCCTAAGAATTGTTTAGAATCAGAGCTGCTTCTTTGGCAGACCTCATGCATCAATATTTATCATTTCGTTTGCAGCATAAGGCATTCTGAGAAATACAGAGAG-GGGGG--AAAGGGACTGTAT-GAGGACATTTGTCTTCTAGCATCTGTCAAAGTCACAAAGCTTAGCAGGAATCAATGAAAATCTGTGACTTCTATTTTTGTCATATTAAAAGTGTGAAGTTTTTGTTATTCCTGGAAATATATTATGTGACTGAAGTGATTTAATGTCTTAATGTTCTGTCTTTCAGATA??????????????????????
Platemys_platycephala		CCCTAAACACAGATTTTTCTCAAT--ACATAAAAATCCGCCAGAGAA-CTACTAATTACTCATTTAAAACTCAAAGGACTTGACGA-TACCTCAAA-CCCAACTAGAGGAGCCTGTTCTATAATCGATAATCCACGATCTACCTCACCACCCATAGCCCATTCAGCCTATATACCTCCGTCTTCAGCCTACCCTATGAAAGTAT-AAAAGTAAGCACAACAGTCAACA--CA--CTAACAAGTCAGGTCAAGGTGTAGCCCA-TGGGGTGGAAGAAATGGGCTACATTTTCTACCA--TAGAAATACACTTTAAC---GGAAGGGACCTTGAAA--CAAGACCC-AGCAAGCAGGATTTAGCAGCAATGTG-AGAACAGAGAGCCCACATTAATCAGGATCTGA-GATGCGTACACACCGCCCGTCACCCTCGTCAAAAA?AAGGGTAATGCCTGCCCAGTGACACAGTTCAACGGCCG-CGGTATTCTGACCGTGCGAAGGTAGCGTAATCACTTGTCTTTTAAATAAAGACTGGAATGAATGGCTAAACGAG-GCTTTACCTGTCTCTTACGGG-TAATCAGTGAAATTGATCTCCTCGTGCAAAAGCGAGAATAATAACATAAGACGAGAAGACCCTGTGGAACTTTAAAT-AATGACTAAACAATAAGAAACCCAC------CAACCAACACGG-CCCACCAACCACAATCTTTCATTAGCCTTA-TTTTCGGTTGGGGTGACCTCGGAGAAAAACCAAACCTCCGAAGA-TTTA-----------CACCAAGA-AAAACAAATCAAAGTG-CCCACGGCT--AAACGATCCAATACATTTGATTAATGAACCAAGCTACCCCAGGGATAACAGCGCAATCCCCTCTTAGAGT-CCCTATCAACGATGGGGGTTTACGACCTCGATGTTGGATCAGGACATCCTAATGGTGCAGCCGCTATTAAGGGTTCTTTACTTAATCTTTGGTACTTGAGCAGGAATAATTGGAACAGCTCTTAGTCTACTAATCCGAACAGAACTAAGCCAGCCAGGCCCACTCATAGGAGATGACCAAGTATACAACGTCATCGTTACAGCCCATGCCTTCATTATAATCTTCTTCATAGTAATACCAGTAATGATTGGAGGATTTGGAAATTGACTAGTCCCAATAATAATTGGGGCCCCAGACATAGCATTCCCACGAATGAATAACATAAGCTTCTGACTCCTACCACCATCATTACTCCTTCTTCTTGCCTCATCCGGAGTAGAAGCTGGAGCCGGAACAGGATGGACCGTGTACCCGCCCTTAGCCGGAAATATAGCACATGCCGGTGCCTCTGTAGACTTAACCATTTTTTCCCTACACTTAGCCGGAGCATCATCGATCCTAGGTGCTATCAACTTTATCACCACAGCAATCAACATAAAAACCCCATCCATATCGCAATATCAAACTCCATTATTTGTATGATCCGTACTAATCACAGCCGTATTACTACTCCTATCTCTCCCAGTCCTAGCAGCAGGAATTACCATACTCCTAACAGACCGAAATCTAAATACAACTTTCTTCGATCCCTCCGGGGGCGGAGACCCAATTCTTTACCAACACCTATGACTCCCAAAGGCCCACGTAGAAGCCCCAATCGCAGGATCAATAGTGCTTGCTGGCGTACTTTTAAAGCTAGGCGGATATGGTATTATCCGAATATCATCAATCCTTACCCCC-CCCTCTCAAGACCTATCCTACCCATTCATAACTCTAGCCCTATGGGGAATCATCATAACCAGCCTAATCTGTCTCCGACAAACAGACCTAAAATCACTGATTGCCTACTCATCAGTCAGCCACATAGGACTTGTAATCTCCGCTACACTTATTCAAACCCCATGAGCACTTACCGGGGCTACCACCCTAATAATTGCCCACGGCCTAACATCATCAATACTATTCTGCCTATCCAACACAAACTATGAACGCACAAACAGCCGAATCCTATTTATCACCCGAAACCTACAACTACTACTACCCCTAATAACACTATGATGACTACTTGCCAGCTTAACAAACATAGCTCTACCACCAACCATCAACTTAACAGGAGAACTATCTGCCATTACTTCCCTATTCAACTGATCCAAAACTACCATCCTGATCACAGGACTGGGCACCGTAATTACAGCTACTTATACACTACACATATTTTCATCCACACAATGAGGCGGAGAATCCTCACCAAAC---ATCAAATCTATTCCCCCCACCCACACACGAGAACACCTGATCATAGTTCTCCACCTACTACCAACAGCCCTACTTATAATAAAACCGCAACTAATCTTAAGTATATTTT???????????????????????????????????????????????????TAAAAAACATAAACCCACTACTAAAAATCATAAACAACACCCTAATCAGCCTACCCGCCCCACCTAACATCTCAGCCCTATGAAACTTTGGCTCACTATTAGGAACATGCCTTGTACTACAATTAGCCACAGGAATCTTCCTAGCCATACATTACTCACCTGACATCTCCCTGGCATTTTCATCCATCTCCCACATCCAACGAGACGTCCAATATGGCTGACTTATCCGAAACATACATGCAAATGGAGCCTCACTATTCTTCATCTGCATGTATTTACACATTGGACGAGGCATCTACTACGGCTCATACCTGTATAAAAAAACTTGAAACACAGGAGTAGCCTTACTCCTCCTAGTCATAGCCACCGCATTCGTAGGCTACGTCCTGCCATGAGGCCAAATATCATTCTGAGGTGCTACAGTAATCACCAACCTACTTTCAGCCCTCCCCTACATCGGCCATACAATAGTAGAATGAATTTGAGGGGGATTCTCCGTAGATAATGCTACCCTGACCCGATTTTTTACATTCCACTTTCTGATCCCATTTATCATCACAGGCATAATAATAGTCCACCTCCTATTCCTACACGAAACAGGATCCAACAACCCCACAGGGTTAAACTCCAACTGTGACAAAATTCCATTCCACCCCTACTTCTCCCTCAAGGACCTCCTAGGGCTCATCATAATACTAACCCTTCTATTGAACCTAACTCTATTCTCACCAAATTTACTGGGAGACCCAGACAACTTCACCCCAGCTAACCCACTTGTCACCCCACCACACATCAAACCAGAATGGTACTTTCTATTCGCCTACGCTATCCTACGATCAATCCCCAACAAACTCGGAGGAGTCCTAGCCCTCCTCTTCTCAATCATAATCCTACTTCTAATACCCGCCCTCCACACATCAAAACAACGAACCCTTACATTCCACCCAATATCCCAAATAGCATTCTGATGCTTAACAGCAGACCTGATCGTCCTAACATGAATTGGAGGCCAACCAGTAGAAGACCCCTTCATTCTCATTGGACAAGTAGCCTCCGTGTTCTACTTCACAACAATCCTCATTATCATACCAATCACCAACCTAATCGAAAACAA--AACAACAAATTGCAAATAAAAAGAAAGCAGAGGAGGTGGCCTCTTTGGACAAAGGCACTGTGGTGCAGATGGATGC---TGCAGTTCCAATGGTAGAAAAGCCACTTCTGGAAGAAACAGCCTTAAAGGACAATAAGCAGGCTCTTGAAAAAGATGCTGACAACCTGAAAATGCAAGACAATGCAGCTCATCAAGCAAACCTGCAGCAGCTCTGTCGCATCTGTGGAGTTTCATTTAAAACTGATCGCTACAAAAGAAGTCACCCAGTGCATGGACCAGTGGACAGTGAAACTCAAGGACTTCTGAGAAAGAAAGAGAAAAGAGCAACATCTTGGCCAGATCTCATTGCCAAGGTTTTTAAGATTGACGTGCGAGGTGATATTGACACAATCCACCCCACTCGGTTTTGTCACAACTGCTGGAGCATCATCCATAGAAAGTTCAGCAATGCACCATGTGAAGTGTATTTCCCGAGGAACAGCACCATGGAGTGGCAGTCCCATTCCCCGAGCTGCACTGTTTGTTGCACTGCTCATCGTGGGGTCAAGAGAAAGAACCAGCCATCCAACTTACAGCTCAGCAAAAGGCTCAAGATCATTGCAGAACGTGCCCGAAAAACTAAAAATGTAAAAAAA---CAAGCACAGGTAAACAACAAAAACCTTATGAAAAAGATTGCCAACTGCAAAAAGATACATCTTAGCACTAAACTTCTTGCAGTTGACTACCCTGCAGATTTCATTAA-GTCCATCTCTTGCCAAATCTGTGAGCATATTCTGGCAGATCCAGTGGAAACGACATGTAGCCACTTGTTCTGCAGAACCTGCATCCTGAAGTGCCTCAAAGTTATGGGCAGCTATTGCCCCTCCTGCCGATACCCTTGCTTCCCTACTGACTTGGAGAGCCCAGTGAAATCCTTCCTGAACATCCTCAATTCCCTGGCTGTGCGATGCCCAGTGAAAGAATGTGATGAGGAGGTTTTGCTGGGAAAATACTGCCATCATTTGTCCAGCCACAAAGAGCTGAAAGGGAAAGAGATTTACACACACATAAATAAAGGCGGCAGACCAAGGCAACATTTACTGTCATTGACGAGGAGAGCTCAAAAGCATCGTCTGAGAGAACTCAAGCTTCAAGTCAAAGCTTTTGCTGAGAAAGAAGAAGGAGGTGATATAAAGGCTGTGTGCCTAACTTTGTTTTTGCTGGCTCTCAGAGCAAGAAATGAACACAGACAAGCAGATGAGTTGGAAGCTATAATGCAAGGGAAGGGATCAGGGCTTCACCCGGCTGTTTGCCTGGCAATCCGAGTCAACACCTTTCTCAGCTGTAGCCAGTACCATAAAATGTACAGAACTGTAAAAGCCATAAGTGGGAGGCAGATCTTCCAGCCACTGCATGCTCTCCGCACTGCTGAAAAGGCCCTCTTGCCAGGTTATCATCCATTTGAGTGGAAACCCCCTTTGAAAAATGTGTCCACTAATACAGAAGTGGGAATTATAGATGGGCTGTCAGGGCTGCCACACTCAGTTGATGACTACCCAGTAGACACAATTGCTAAGAGGTTTCGATATGATGCAGCCTTAGTTTCTGCCTTAATGGACATGGAGGAAGACATCTTGGAAGGGATGAAAGCCCAAGACCTGGATGACTACTTGAATGGTCCCTTCACTGTGGTGGTGAAGGAATCTTGTGATGGGATGGGAGATGTCAGCGAGAAGCATGGAAGTGGACCGGCTGTTCCTGAGAAGGCAGTTCGATTTTCTTTCACGCTCATGAGCATCACAATAGCTCATGGCAATGAAAATGTAAGGATCTTTGAAGAAGCCAAGCCTAATTCAGAGCTGTGTTGCAAACCCCTGTGTCTTATGCTAGCTGATGAATCAGACCATGAGACGCTGACTGCCATCCTGAGCCCTCTCATAGCAGAAAGAGAGACCATGAAAAACAGTGTCCTGCTTCTTGAAATGGGAGGCATCCTCAGAACATTCAAATTCATCTTTAGAGGTACAGGGTATGATGAGAAACTTGTCCGTGAAGTGGAAGGCCTCGAAGCCTCAGGCTCTACTTACATCTGCACCCTTTGTGATGCAACCCGCCTGGAAGCCGCTCAGAACTTGGTCCTCCACTCCATAACAAGAAGTCATGCTGAAAACCTGGAACGGTATGAGGTATGGAGGTCCAACCCATATCATGAATCTGTTGATGAACTACGTGACAGAGTGAAGGGTGTTTCTGCCAAACCTTTCATTGAGACTGTTCCTTCCATAGATGCATTGCATTGTGACATTGGCAATGCAGCTGAGTTCTACAAGATATTCCAGTTTGAGATAGGTGAGGTGTACAAGAACCCTAACACATCTAAAGAAGAGAGGAAGAGGTGGCAGTCGACTCTTGACAAGCACCTTAGGAAGAAGATGAACCTGAAGCCCATAATGAGGATGAATGGAAACTTTGCTAGAAAGCTTATGTCCAAAGAGACAGTGGAAGCAGTCTGTGAATTAATAACGGGTGAGGAAAGGCATGAAGCCCTAAGAGAACTGATGGACCTTTACCTTAAGATGAAACCAGTGTGGAGGTCTTCATGCCCAGCCAAAGAGTGCCCAGAACTGCTGTGTCAGTATAGCTTCAACTCACAACGTTTTGCTGAGCTCCTGTCCACAAAGTTCAAGTACAGATATGAGGGCAAGATTACAAATTACTTTCACAAAACTCTTGCTCATGTTCCTGAAATCATTGAAAGAGATGGCTCCATTGGGGCCTGGGCAAGTGAAGGGAACGAGTCTGGGAACAAACTGTTTAGGCGTTTC?????????????????????????????????????????????????????????????????????????????????????????????????????????????????????????????????????????????????????????????????????????????????????????????????????????????????????????????????????????????????????????????????????????????????????????????????????????????????????????????????????????????????????????????????????????????AAGTCATAATTCTTTGCATATTTGTAATGATTTATTTAAATAAGGAG-TGAGTGTGTGTGATATTAATTGAAGCAGAGATGCACGCTAGTTATATAGCAGTTATGAACAGCATAAATCATATCCATAAAAGTCATTTCAAACAGATCTGTGTTTCAGTGAATGTATTTATCTGGCTTTCAGCAGGATTGAAATATTCATAAAAATCATTGCATTTTAAAAATGAAAAGCCAGATTCATCATTGTTGTTCCAGTTTTACATTAGCGTAACTCCACTGAACCCAGCATAGAGTTAGGTTAGTGAT-GGGGTGAATCGGATCCAATGTTTTGTGTTTCAAGCAATCTGGCAGGCATTAGATTGACTCTGAGAGATCTGTGAGTTTTACTAAGGCAGATTTTTTTCC-TCCATCCTCACAGTTCTGAGTCACACCCTTTGCCAGTCATCTCTGGGTAAGAAACTGAAGCTTGTCTGAGAAGTGAGGAAGAATGTTTATATCTTTGTAATTATTGAAGCATTACTAC---ATTTTGGTGCAATGTATGGAAAGGATTAATATAACAAAGGACACTTACAAGTGGGTCCTTTTCTGGGCACGTGAACGTGTTGGGAATTGTTAAGCGTCATTTTTGTCCTACGGATGTGTCTGGAGTCAGCCTTTCAGCTCCTTTCCATGAAGAATGAGAATTATAATGCATATGAAGCCTGGTCCTGCCTGGCACTGAGTGCCCTC-AAACCCCATTGACTTTGGAAGTCACAGATGTTCAGCATCTC--ACCGGATTGGCTCAATGGTCGCCTAAGAATTGTTTAGAATCAGAGCTGCTTCTTTGGCAGACCTCATGCATCAATATTTATCATTTCGTTTGCAGCATAAGGCATTCTGAGAAATACAGAGAG-GGGGG--AAAGGGACTGTAT-GAGGACATTTGTCTTCTAGCATCTGTCAAAGTCACAAAGCTTAACAGGAATCAATGAAAATCTGTGACTTCTATTTTTGTCATATTAAAAATGTGAAGTTTTCGTTATTCCTGGAAATATATTATGTGCCTGAAGTGATTTAATTTCTTAATGTTCTGTCTTTCAGATACAGATGGCTATCCAGCACATAG
Acanthochelys_pallidipectoris	CCCTAAACATGGATTTTTCTNTACGTACATAAAAATCCGCCAGAGAAATTTTTAATCACAAATTTAAATCTCAGGGGTTTTGCGGG-TGTCTCAAA-TCCATCTAGGGGAGCCTTTTCTATAATCGATACTCCACGATCTCCCTCACCACCCATGGCCC-NCCAGCCTATATCCCCCCCTCTTCAGCCTACCTTATGAAGGTTT-AAAGGTAGGNATAATNGCCAACAAGCA--CTAACAAGTCAGGTCAGGGTGTAGCCCA-TGGGGNGGAAGAAATCGNCTACATTTTCTCCCA-AAGGAAATCT-CCTTAACA--GGAGGGGCCCTGGAAT--TAGGACCC-ATAAAGCAGGATTTAGCAGTAATGTA-AGAACAGAGAGCCTACATTAATTAGGAC-TGA-GAC????????????????????????????????????????????????????TGAYAT-GKTCATCGGYCG-TGGTATTCTGACCGTGCGARGGTAGCGTAATCACTTGTCTTTTAAATAAAGACTGGAATGAATGGCTAAACGAG-GCTYTATCTGTCTCTTACGGG-AAATCAGTGAAATTGATCTCCTCGTGCAAAAGCGAGAATAATAACATAAGACGAGAAGACCCTGTGGAACTTCAAAT-ATCAGCTAAAGACCAA-AAACCAAC------AAACCAATA-GG-RCCACCAACCACAATCCCTACTTAGCCTTA-TTTTCGGTTGGGGTGACCTCGGGGAATAACAAAACCCCCGAAMA-CATW-----------TWCTAAGA-ATAACAAGCCAAAGTM-CCTACGGST--AAACGATCCAATACATTKGRTTAATGAACCRAGCTACCCCAGGGATAACAGSGCAATCCCCTCTTAGAGT-CCCTATCAACGASGGGGGTTTMCGACCTCGATGTTGGATCAGGACATCCTAATGGTGTAKCCGCTA??????????TTTACCTAATTTTTGGTGCCTGAGCAGGAATAATTGGAACAGCCCTTAGTTTACTAATCCGAACAGAACTAAGCCAGCCGGGCCCACTTATAGGAGATGACCAAGTATACAATGTCATCGTTACAGCCCACGCCTTCATTATAATTTTCTTTATAGTTATACCGGTAATGATCGGAGGATTTGGAAACTGACTAGTCCCAATAATAATTGGAGCACCAGACATGGCATTCCCACGAATGAATAACATAAGCTTTTGACTTCTCCCACCATCACTTCTACTTCTTCTAGCCTCCTCAGGAGTAGAAGCCGGAGCCGGAACAGGATGAACCGTATATCCACCCCTAGCTGGAAACATGGCACACGCTGGCGCTTCTGTAGATCTAACTATCTTTTCCCTACACCTAGCCGGAGCATCATCAATCTTAGGGGCTATTAACTTTATTACTACAGCAATCAACATAAAAACCCCATCCATGTCACAATACCAAACCCCATTATTCGTATGATCAGTACTAATCACAGCCGTACTATTACTACTTTCCTTACCAGTCCTTGCAGCAGGAATCACTATACTCCTAACAGACCGAAACCTAAATACAACCTTCTTCGACCCATCCGGAGGTGGAGACCCAATTCTATATCAACACCTATGACTACCAAAAGCTCATGTAGAAGCCCCAATTGCCGGATCAATAGTTCTTGCTGGCGTACTTCTAAAACTAGGAGGATATGGAATTATCCGAATATCATCCATCCTCACCCCA-CCATTTAAAGACCTATCTTACCTATTTATAATCCTAGCCCTATGAGGCATCATCATAACCAGCTTAATCTGTCTTCGACAAACAGACCTAAAATCACTTATTGCCTACTCATCAGTTAGCCATATAGGACTTGTAATTGCCGCCACACTCATCCAGACCCCATGAGCACTTACTGGGGCCACCACTCTAATGATTGCCCACGGCCTAACATCATCAATACTATTCTGCCTGTCTAACACAAACTACGAACGAACAAACAGCCGAATCCTACTCATCACCCGAAACCTACAATTACTACTGCCACTCATAACATTATGATGACTACTTGCCAGTCTTACTAACATAGCCCTACCACCAACCATTAACTTAATAGGAGAACTATACACTATTACTTCCCTATTCCATTGATCTAAAACCACCATCTTAATTACAGGGTTGGGCACCGTAATTACAGCCACCTACACACTATACATGTTCTCATCTACACAATGAGGAGGAGAACTCCCATCCAAC---ATTAAAACCATCTCACCCGCCCACACACGAGAACACCTAATCATAGTCCTCCATCTACTACCAATAGCCCTACTTATAATCAAACCCCAATTAATCTCAAGTATATTT????????????????????????????????????????????????????TAAAAAACACTAACCCACTATTAAAAATCATAAACAACACCCTAATCAGCCTACCCGCCCCATCCAACATTTCAACCTTATGAAACTTCGGATCCCTGCTAGGAGCATGCCTTACACTACAATTAATTACAGGAATCTTCTTAGCCATACACTACTCATCCGATACTTCCCTAGCATTCTCATCCATTTCCCATATTCAACGAGATGTCCAATATGGTTGATTAATCCGAAACATACATGCAAACGGAGCCTCACTATTCTTCATTTGTATATACCTACATATCGGACGAGGCATGTACTACGGATCTTACCTCTACAAAAAAACCTGAAACACAGGAGTCATCCTGCTCCTCCTAGTTATAGCCACCGCATTCGTAGGCTATGTCCTACCATGAGGACAAATATCATTCTGAGGG????????????????????????????????????????????????????????????????????????????????????????????????????????????????????????????????????????????????????????????????????????????????????????????????????????????????????????????????????????????????????????????????????????????????????????????????????????????????????????????????????????????????????????????????????????????????????????????????????????????????????????????????????????????????????????????????????????????????????????????????????????????????????????????????????????????????????????????????????????????????????????????????????????????????????????????????????????????????????????????????????????????????????????????????????????????????????????????????????????????????????????????????????????????????????????????????????????????????????????????????????????????????????????????????????????????????????????????????????????????????????????????????????????????????????????????????????????????????????????????????????????????????????????????????????????????????????????????????????????????????????????????????????????????????????????????????????????????????????????????????????????????????????????????????????????????????????????????????????????????????????????????????????????????????????????????????????????????????????????????????????????????????????????????????????????????????????????????????????????????????????????????????????????????????????????????????????????????????????????????????????????????????????????????????????????????????????????????????????????????????????????????????????????????????????????????????????????????????????????????????????????????????????????????????????????????????????????????????????????????????????????????????????????????????????????????????????????????????????????????????????????????????????????????????????????????????????????????????????????????????????????????????????????????????????????????????????????????????????????????????????????????????????????????????????????????????????????????????????????????????????????????????????????????????????????????????????????????????????????????????????????????????????????????????????????????????????????????????????????????????????????????????????????????????????????????????????????????????????????????????????????????????????????????????????????????????????????????????????????????????????????????????????????????????????????????????????????????????????????????????????????????????????????????????????????????????????????????????????????????????????????????????????????????????????????????????????????????????????????????????????????????????????????????????????????????????????????????????????????????????????????????????????????????????????????????????????????????????????????????????????????????????????????????????????????????????????????????????????????????????????????????????????????????????????????????????????????????????????????????????????????????????????????????????????????????????????????????????????????????????????????????????????????????????????????????????????????????????????????????????????????????????????????????????????????????????????????????????????????????????????????????????????????????????????????????????????????????????????????????????????????????????????????????????????????????????????????????????????????????????????????????????????????????????????????????????????????????????????????????????????????????????????????????????????????????????????????????????????????????????????????????????????????????????????????????????????????????????????TGCAGCAAGAACCGGCTGGCATCGCGACAAAGCTTCTGGGCTGAGCTGAATGTGGCCTGGCTACACCATCCCAATGTGGTACGTGTTGTAGCTGCTAGCACTTGTGCCCCTGCCAACCAAGACAGCCTGGGCACCATAATCATGGAATATGCTGGCCGCACTACCCTGCACCATGTCATCTATGGCACTGGTTGCCTGCAGGGAAAGGGAGAGGATGATGGGGGTGGACATGGCAAGGAACCCTTAAGCATTGCTGAATCCCTGGGTTATTCCTCTGATATTGTGACTGGCTTAGTCTTCCTCCACTCACAGTGCGTTGTGCACCTGGACCTGAAGCCTGCTAATGTATTCATCACCGAGCAG?????????????????????????????????????????????????????????????????????????????????????????????????????????????????????????????????????????????????????????????????????????????????????????????????????????????????????????????????????????????????????????????????????????????????????????????????????????????????????????????????????????????????????????????????????????????????????????????????????????????????????????????????????????????????????????????????????????????????????????????????????????????????????????????????????????????????????????????????????????????????????????????????????????????????????????????????????????????????????????????????????????????????????????????????????????????????????????????????????????????????????????????????????????????????????????????????????????????????????????????????????????????????????????????????????????????????????????????????????????????????????????????????????????????????????????????????????????????????????????????????????????????????????????????????????????????????????????????????????????????????????????????????????????????????????????????????????????????????????????
Acanthochelys_spixii		??????????????????????????????????????????????????????????????????????????????????????????????????????????????????????????????????????????????????????????????????????????????????????????????????????????????????????????????????????????????????????????????????????????????????????????????????????????????????????????????????????????????????????????????????????????????????????????????????????????????????????????????????????????????????????????????????????????????????????????????????????????????????????TAGTGTAATCACTTGTCTTTTATATAAAGACTGGAATGMATGGCTAAACTAGTGCTTTATCTGTCTCTTACGGGTAAATCAGTGAAATTGATCTCCTCGTGCAAAAGCGAGAATAATAACATAAGACGAGAAGACCCTGTGGAACTTCAAAT-ATCAGCTAAAGACCAATAAACCAAC------AAACCAATA-GA-ACCACCAACCACAATCCCTACTTAGCCTTA-TTTTCGGTTGGGGTGACCTCGGGGAATAACAAAACCCCCGAAAA-CATA-----------CACCAAGA-ATAACAAGCCAAAGTAGCCTACGGCTTTAACRGATCCAATACATTTGATTAATGAACCAAGCTACCCCAGGGATAACAGCGCAATCCCCTCTTAGAGT-CCCTATCAACGACGGGGGTTTACGACCTCGATGTTGGATCAGGACATCCTAATGGTG?????????????????????????????????????????????????????????????????????????????????????????????????????????????????????????????????????????????????????????????????????????????????????????????????????????????????????????????????????????????????????????????????????????????????????????????????????????????????????????????????????????????????????????????????????????????????????????????????????????????????????????????????????????????????????????????????????????????????????????????????????????????????????????????????????????????????????????????????????????????????????????????????????????????????????????????????????????????????????????????????????????????????????????????TGACTACCAAAAGCTCATGTAGAAGCCCCAATTGCCGGATCAATAGTTCTTGCTGGCGTACTTCTAAAACTAGGAGGATATGGAATTATCCGAATATCATCTATCCTCACCCCA-CCATTCAAAGACCTATCTTACCTATTTATAATCCTAGCCCTATGGGGCATCATCATAACCAGCCTAATCTGCCTCCGACAAACAGACCTAAAATCACTTATTGCCTACTCATCGGTTAGCCATATAGGACTTGTAATTGCCGCCACACTCATCCAGACCCCATGAGCACTTACTGGGGCCACCACCCTAATGATCGCCCACGGCCTAACATCATCAATACTATTCTGCCTATCTAACACAAACTACGAACGAACAAACAGCCGAATCCTACTCATCACCCGAAACCTACAATTACTACTACCACTCATAACATTATGATGACTACTTGCCAGCCTTACTAACATAGCCTTACCACCAACCATTAACTTAATAGGAGAACTATACACTATTACTTCCCTATTCCATTGATCTAAAACCACCATCTTAATTACAGGGTTAGGCACCGTAATTACAGCCACCTACACACTATATATGTTCTCATCTACACAATGAGGAGGAGAACTCCCATCCAAC---ATTAAAACCATCTCACCCACCCACACACGAGAACACCTAATCATAGTCCTCCATCTACTACCAATAGCCCTACTTATAATGAAACCCCAGTTAATCTCAAGTATATTT????????????????????????????????????????????????????TAAAAAACACTAACCCACTATTAAAAATCATAAACAACACCCTAATCAGCCTACCCGCCCCATCCAACATTTCAACCTTATGAAACTTCGGATCCCTGCTAGGAGCATGCCTTGCACTACAATTAATTACAGGAATCTTCTTAGCCATACACTACTCATCCGATACTTCCCTAGCATTCTCATCCATTTCCCACATTCAACGAGATGTCCAATATGGTTGATTAATCCGAAACATACATGCAAACGGAGCCTCACTATTCTTCATTTATATATACCTACACATCGGACGAGGCATGTACTACGGGTCTTACCTCTACAAAAAAACCTGAAACACAGGAGTCATCCTGCTCCTCCTAGTTATAGCCACCGCATTCGTAGGCTATGTCCTACCATGAGGACAAATATCATTCTGAGGG????????????????????????????????????????????????????????????????????????????????????????????????????????????????????????????????????????????????????????????????????????????????????????????????????????????????????????????????????????????????????????????????????????????????????????????????????????????????????????????????????????????????????????????????????????????????????????????????????????????????????????????????????????????????????????????????????????????????????????????????????????????????????????????????????????????????????????????????????????????????????????????????????????????????????????????????????????????????????????????????????????????????????????????????????????????????????????????????????????????????????????????????????????????????????????????????????????????????????????????????????????????????????????????????????????????????????????????????????????????????????????????????????????????????????????????????????????????????????????????????????????????????????????????????????????????????????????????????????????????????????????????????????????????????????????????????????????????????????????????????????????????????????????????????????????????????????????????????????????????????????????????????????????????????????????????????????????????????????????????????????????????????????????????????????????????????????????????????????????????????????????????????????????????????????????????????????????????????????????????????????????????????????????????????????????????????????????????????????????????????????????????????????????????????????????????????????????????????????????????????????????????????????????????????????????????????????????????????????????????????????????????????????????????????????????????????????????????????????????????????????????????????????????????????????????????????????????????????????????????????????????????????????????????????????????????????????????????????????????????????????????????????????????????????????????????????????????????????????????????????????????????????????????????????????????????????????????????????????????????????????????????????????????????????????????????????????????????????????????????????????????????????????????????????????????????????????????????????????????????????????????????????????????????????????????????????????????????????????????????????????????????????????????????????????????????????????????????????????????????????????????????????????????????????????????????????????????????????????????????????????????????????????????????????????????????????????????????????????????????????????????????????????????????????????????????????????????????????????????????????????????????????????????????????????????????????????????????????????????????????????????????????????????????????????????????????????????????????????????????????????????????????????????????????????????????????????????????????????????????????????????????????????????????????????????????????????????????????????????????????????????????????????????????????????????????????????????????????????????????????????????????????????????????????????????????????????????????????????????????????????????????????????????????????????????????????????????????????????????????????????????????????????????????????????????????????????????????????????????????????????????????????????????????????????????????????????????????????????????????????????????????????????????????????????????????????????????????????????????????????????????????????????????????????????????????????????????????????????????????????????????????????????????????????????????????????????????????????????????????????????????????????????????????????????????????????????????????????????????????????????????????????????????????????????????????????????????????????????????????????????????????????????????????????????????????????????????????????????????????????????????????????????????????????????????????????????????????????????????????????????????????????????????????????????????????????????????????????????????????????????????????????????????????????????????????????????????????????????????????????????????????????????????????????????????????????????????????????????????????????????????????????????????????????????????????????????????????????????????????????????????????????????????????????????????????????????????????????????????????????????????????????????????????????????????????????????????????????????????????????????????????????????????????????????????????????????????????????????????????????????????????????????????????????????????????????????????????????????????????????????????????????????????????????????????????????????????????????????????????????????????????????????????????????????????????????????????????????????????????????????????????????????????????????????????????????????????????????????????????????????????????????????????????????????????????????????????????????????????????????????????????????????????????????????????????????????????????????????????????????????????????????????????
Acanthochelys_macrocephala	??????????????????????????????????????????????????????????????????????????????????????????????????????????????????????????????????????????????????????????????????????????????????????????????????????????????????????????????????????????????????????????????????????????????????????????????????????????????????????????????????????????????????????????????????????????????????????????????????????????????????????????????????????????????????????????????????????????????????????????????????????????????????????????????????????????????????????????????????????????????????????????????????????????????????????????????????????????????????????????????????????????????????????????????????????????????????????????????????????????????????????????????????????????????????????????????????????????????????????????????????????????????????????????????????????????????????????????????????????????????????????????????????????????????????????????????????????????????????????????????????????????????TTTACCTAATTTTTGGTGCCTGAGCAGGAATAATTGGAACAGCCCTTAGTTTACTAATCCGAACAGAACTAAGCCAACCGGGCCCACTTATAGGAGACGACCAAGTATACAATGTCATCGTTACAGCCCACGCCTTCATTATAATTTTCTTTATAGTTATACCAGTAATGATCGGAGGATTTGGAAACTGACTAGTCCCAATAATAATTGGAGCACCAGACATGGCATTCCCACGAATGAATAACATAAGCTTTTGACTTCTCCCACCATCACTTCTACTTCTCCTAGCCTCCTCAGGAGTAGAAGCCGGAGCCGGAACAGGATGAACCGTATATCCACCCCTAGCTGGAAACATGGCACACGCTGGCGCTTCTGTAGATCTAACTATCTTTTCCCTACACCTAGCCGGAGCATCATCAATCTTAGGGGCTATTAACTTTATTACTACAGCAATCAACATAAAAACCCCATCCATATCACAATACCAAACCCCATTATTCGTATGATCAGTACTAATCACAGCCGTACTATTACTACTTTCCCTGCCAGTCCTTGCAGCAGGAATCACTATACTTCTAACAGACCGAAACCTAAATACAACCTTCTTCGACCCATCCGGAGGTGGAGACCCAATTCTATATCAACACCTATGACTACCAAAAGCTCATGTAGAAGCCCCGATTGCCGGATCAATAGTTCTTGCTGGCGTACTTCTAAAACTAGGAGGATATGGAATTATCCGAATATCATCTATCCTCACCCCA-CCATTCAAAGACCTATCTTACCTATTTATAATCCTAGCCCTATGAGGCATCATCATAACCAGCTTAATCTGCCTCCGACAAACAGACCTAAAATCACTTATTGCCTACTCATCAGTTAGCCATATAGGACTTGTAATTGCCGCCACACTCATCCAGACCCCATGAGCACTTACTGGAGCCACCACCCTAATGATCGCCCACGGCCTAACATCATCAATACTATTCTGCCTATCTAACACAAACTACGAACGAACAAACAGCCGAATCCTACTCATCACCCGAAACCTACAATTACTACTGCCACTCATAACATTATGATGACTACTTGCCAGCCTTACTAACATAGCCTTACCACCAACCATCAACTTAATAGGAGAACTATACACCATTACTTCCCTATTCCATTGATCTAAAACCACCATCTTAATTACAGGGTTGGGCACCGTAATTACAGCCACCTACACACTATACATATTCTCATCTACACAATGAGGAGGAGAACTCCCATCCAAC---ATTAAAACCATCTCACCCACCCACACACGAGAACACCTAATTATAGTCCTTCATCTACTACCAATAGCCCTACTTATAGTCAAACCCCAGTTAATCTCAAGTATATTT????????????????????????????????????????????????????TAAAAAAGCACATCCCACTATTAAAAATAATAAACAACACCCTAATCAGCCTACCCGCCCCATCCAACATTTCAACCTTATGAAACTTCGGATCCCTNCTAGGAGCATGCCTTGCACTACAATTAATYACAGGAATTTTCTTAGCCATACACTACTCATCCGATACTTCCCTAGCATTCTCATCCATYTCCCAYATTCAACGAGAYGTCCAATATGGNTGACTTATCCGAAACATACATGCAAACGGGGCCTCACTATTCTTCATTTGTATATACCTACACATCGGACGAGGCATGTACTACGGATCTTACCTCTACAAAAAAACCTGAAACACAGGAGTCATCCTACTCCTCCTAGTTATAGCCACCGCATTTGTAGGCTATGTCCTACCATGAGGACAAATATCATTCTGAGGG????????????????????????????????????????????????????????????????????????????????????????????????????????????????????????????????????????????????????????????????????????????????????????????????????????????????????????????????????????????????????????????????????????????????????????????????????????????????????????????????????????????????????????????????????????????????????????????????????????????????????????????????????????????????????????????????????????????????????????????????????????????????????????????????????????????????????????????????????????????????????????????????????????????????????????????????????????????????????????????????????????????????????????????????????????????????????????????????????????????????????????????????????????????????????????????????????????????????????????????????????????????????????????????????????????????????????????????????????????????????????????????????????????????????????????????????????????????????????????????????????????????????????????????????????????????????????????????????????????????????????????????????????????????????????????????????????????????????????????????????????????????????????????????????????????????????????????????????????????????????????????????????????????????????????????????????????????????????????????????????????????????????????????????????????????????????????????????????????????????????????????????????????????????????????????????????????????????????????????????????????????????????????????????????????????????????????????????????????????????????????????????????????????????????????????????????????????????????????????????????????????????????????????????????????????????????????????????????????????????????????????????????????????????????????????????????????????????????????????????????????????????????????????????????????????????????????????????????????????????????????????????????????????????????????????????????????????????????????????????????????????????????????????????????????????????????????????????????????????????????????????????????????????????????????????????????????????????????????????????????????????????????????????????????????????????????????????????????????????????????????????????????????????????????????????????????????????????????????????????????????????????????????????????????????????????????????????????????????????????????????????????????????????????????????????????????????????????????????????????????????????????????????????????????????????????????????????????????????????????????????????????????????????????????????????????????????????????????????????????????????????????????????????????????????????????????????????????????????????????????????????????????????????????????????????????????????????????????????????????????????????????????????????????????????????????????????????????????????????????????????????????????????????????????????????????????????????????????????????????????????????????????????????????????????????????????????????????????????????????????????????????????????????????????????????????????????????????????????????????????????????????????????????????????????????????????????????????????????????????????????????????????????????????????????????????????????????????????????????????????????????????????????????????????????????????????????????????????????????????????????????????????????????????????????????????????????????????????????????????????????????????????????????????????????????????????????????????????????????????????????????????????????????????????????????????????????????????????????????????????????????????????????????????????????????????????????????????????????????????????????????????????????????????????????????????????????????????????????????????????????????????????????????????????????????????????????????????????????????????????????????????????????????????????????????????????????????????????????????????????????????????????????????????????????????????????????????????????????????????????????????????????????????????????????????????????????????????????????????????????????????????????????????????????????????????????????????????????????????????????????????????????????????????????????????????????????????????????????????????????????????????????????????????????????????????????????????????????????????????????????????????????????????????????????????????????????????????????????????????????????????????????????????????????????????????????????????????????????????????????????????????????????????????????????????????????????????????????????????????????????????????????????????????????????????????????????????????????????????????????????????????????????????????????????????????????????????????????????????????????????????????????????????????????????????????????????????????????????????????????????????????????????????????????????????????????????????????????????????????????????????????????????????????????????????????????????????????????????????????????????????????????????????????????????????????????????????????????????????????????????????????????????????
Mesoclemmys_vanderhaegei	??????????????????????????????????????????????????????????????????????????????????????????????????????????????????????????????????????????????????????????????????????????????????????????????????????????????????????????????????????????????????????????????????????????????????????????????????????????????????????????????????????????????????????????????????????????????????????????????????????????????????????????????????????????????????????????????????????????????????????????????????????????????????????????????????????????????????????????????????????????????????????????????????????????????????????????????????????????????????????????????????????????????????????????????????????????????????????????????????????????????????????????????????????????????????????????????????????????????????????????????????????????????????????????????????????????????????????????????????????????????????????????????????????????????????????????????????????????????????????????????????????????????TTTACTTAATCTTCGGGGCCTGAGCAGGAATGATCGGGACAGCCCTCAGCCTACTAATTCGAACAGAACTAAGCCAACCTGGCCCACTAATAGGAGACGACCAAGTATACAACGTTATCGTCACAGCCCATGCTTTCGTCATAATCTTCTTCATAGTTATACCGGTAATAATCGGAGGATTTGGAAACTGATTAGTCCCAATAATAATCGGAGCACCAGACATAGCATTCCCCCGGATAAATAACATAAGCTTCTGGCTTCTCCCACCATCACTGCTCCTACTCCTGGCCTCATCCGGGGTAGAAGCTGGAGCCGGAACAGGGTGAACCGTCTATCCACCTCTAGCCGGGAACATAGCACATGCCGGCGCCTCTGTAGACTTGACTATCTTTTCCCTACACTTGGCCGGAGCATCATCAATCTTGGGCGCTATTAACTTTATTACCACAGCAATCAACATAAAAACCCCATCCATATCACAATACCAAACCCCTTTATTTGTGTGATCCGTACTTATTACAGCTGTATTACTTCTTCTATCCCTCCCAGTACTTGCAGCTGGAATCACTATACTTCTAACAGACCGAAACCTAAATACAACCTTCTTTGACCCATCTGGGGGTGGAGATCCAATCCTTTACCAACACCTA???????????????????????????????????????????????????????????????????????????????????????????????????????????????????????????????????????????????????????????????????????????????????????????????????????????????????????????????????????????????????????????????????????????????????????????????????????????????????????????????????????????????????????????????????????????????????????????????????????????????????????????????????????????????????????????????????????????????????????????????????????????????????????????????????????????????????????????????????????????????????????????????????????????????????????????????????????????????????????????????????????????????????????????????????????????????????????????????????????????????????????????????????????????????????????????????????????????????????????????????????????????????????????????????????????????????????????????????????????????????????????????????????????????????????????????????????????????????????????????????????????????????????????????????????????????????????????????????????????????????????????????????????????????????????????????????????????????????????????????????????????????????????????????????????????????????????????????????????????????????????????????????????????????????????????????????????????????????????????????????????????????????????????????????????????????????????????????????????????????????????????????????????????????????????????????????????????????????????????????????????????????????????????????????????????????????????????????????????????????????????????????????????????????????????????????????????????????????????????????????????????????????????????????????????????????????????????????????????????????????????????????????????????????????????????????????????????????????????????????????????????????????????????????????????????????????????????????????????????????????????????????????????????????????????????????????????????????????????????????????????????????????????????????????????????????????????????????????????????????????????????????????????????????????????????????????????????????????????????????????????????????????????????????????????????????????????????????????????????????????????????????????????????????????????????????????????????????????????????????????????????????????????????????????????????????????????????????????????????????????????????????????????????????????????????????????????????????????????????????????????????????????????????????????????????????????????????????????????????????????????????????????????????????????????????????????????????????????????????????????????????????????????????????????????????????????????????????????????????????????????????????????????????????????????????????????????????????????????????????????????????????????????????????????????????????????????????????????????????????????????????????????????????????????????????????????????????????????????????????????????????????????????????????????????????????????????????????????????????????????????????????????????????????????????????????????????????????????????????????????????????????????????????????????????????????????????????????????????????????????????????????????????????????????????????????????????????????????????????????????????????????????????????????????????????????????????????????????????????????????????????????????????????????????????????????????????????????????????????????????????????????????????????????????????????????????????????????????????????????????????????????????????????????????????????????????????????????????????????????????????????????????????????????????????????????????????????????????????????????????????????????????????????????????????????????????????????????????????????????????????????????????????????????????????????????????????????????????????????????????????????????????????????????????????????????????????????????????????????????????????????????????????????????????????????????????????????????????????????????????????????????????????????????????????????????????????????????????????????????????????????????????????????????????????????????????????????????????????????????????????????????????????????????????????????????????????????????????????????????????????????????????????????????????????????????????????????????????????????????????????????????????????????????????????????????????????????????????????????????????????????????????????????????????????????????????????????????????????????????????????????????????????????????????????????????????????????????????????????????????????????????????????????????????????????????????????????????????????????????????????????????????????????????????????????????????????????????????????????????????????????????????????????????????????????????????????????????????????????????????????????????????????????????????????????????????????????????????????????????????????????????????????????????????????????????????????????????????????????????????????????????????????????????????????????????????????????????????????????????????????????????????????????????????????????????????????????????????????????????????????????????????????????????????????????????????????????????????????????????????????????????????????????????????????????????????????????????????????????????????????????????????????????????????????????????????????????????????????????????????????????????????????????????????????????????????????????????????????????????????????????????????????????????????????????????????????????????????????????????????????????????????????????????????????????????????????????????????????????????????????????????????????????????????????????????????????????????????????????????????????????????????????????????????????????????????????????????????????????????????????????????????????????????????????????????????????????????????????????????????????????????????????????????????????????????????????????????????????????????????????????????????????????????????????????????????????????????????????????????????????????????????????????????????????????????????????????????????????????????????????????????????????????????????????????????????????????????????????????????????????????????????????????????????????????????????????????????????????????????????????????????????????????????????
Mesoclemmys_raniceps		??????????????????????????????????????????????????????????????????????????????????????????????????????????????????????????????????????????????????????????????????????????????????????????????????????????????????????????????????????????????????????????????????????????????????????????????????????????????????????????????????????????????????????????????????????????????????????????????????????????????????????????????????????????????????????????????????????????????????????????????????????????????????????????????????????????????????????????????????????????????????????????????????????????????????????????????????????????????????????????????????????????????????????????????????????????????????????????????????????????????????????????????????????????????????????????????????????????????????????????????????????????????????????????????????????????????????????????????????????????????????????????????????????????????????????????????????????????????????????????????????????????????TCTACTTAATCTTCGGCGCCTGAGCAGGAATAATTGGAACAGCCCTCAGTCTACTAATTCGAACAGAACTTAGCCAACCAGGACCACTCATGGGAGACGACCAAGTATACAACGTCATCGTCACAGCCCATGCCTTCATCATAATTTTCTTCATGGTTATACCAATCATAATTGGTGGATTTGGCAACTGATTAGTTCCAATAATAATCGGAGCACCAGACATAGCGTTCCCTCGAATGAACAATATAAGCTTCTGACTCCTCCCCCCATCCCTACTACTACTTCTAGCATCATCGGGGGTTGAAGCTGGGGCTGGAACAGGATGAACCGTCTACCCGCCTCTGGCTGGAAACATAGCACACGCCGGCGCCTCTGTAGATTTGACCATCTTTTCCTTACACCTAGCCGGAGCGTCATCAATCTTAGGCGCTATCAACTTTATCACCACAGCAATCAACATAAAAACTCCCTCCATATCACAATACCAAACCCCCCTCTTCGTCTGATCTGTGCTGATCACAGCCGTGTTATTACTCCTATCCCTCCCAGTTCTTGCAGCAGGAATTACTATACTCCTCACAGACCGCAACCTAAATACAACCTTCTTTGATCCCTCCGGTGGCGGAGACCCAATTCTTTATCAACACCTA???????????????????????????????????????????????????????????????????????????????????????????????????????????????????????????????????????????????????????????????????????????????????????????????????????????????????????????????????????????????????????????????????????????????????????????????????????????????????????????????????????????????????????????????????????????????????????????????????????????????????????????????????????????????????????????????????????????????????????????????????????????????????????????????????????????????????????????????????????????????????????????????????????????????????????????????????????????????????????????????????????????????????????????????????????????????????????????????????????????????????????????????????????????????????????????????????????????????????????????????????????????????????????????????????????????????????????????????????????????????????????????????????????????????????????????????????????????????????????????????????????????????????????????????????????????????????????????????????????????????????????????????????????????????????????????????????????????????????????????????????????????????????????????????????????????????????????????????????????????????????????????????????????????????????????????????????????????????????????????????????????????????????????????????????????????????????????????????????????????????????????????????????????????????????????????????????????????????????????????????????????????????????????????????????????????????????????????????????????????????????????????????????????????????????????????????????????????????????????????????????????????????????????????????????????????????????????????????????????????????????????????????????????????????????????????????????????????????????????????????????????????????????????????????????????????????????????????????????????????????????????????????????????????????????????????????????????????????????????????????????????????????????????????????????????????????????????????????????????????????????????????????????????????????????????????????????????????????????????????????????????????????????????????????????????????????????????????????????????????????????????????????????????????????????????????????????????????????????????????????????????????????????????????????????????????????????????????????????????????????????????????????????????????????????????????????????????????????????????????????????????????????????????????????????????????????????????????????????????????????????????????????????????????????????????????????????????????????????????????????????????????????????????????????????????????????????????????????????????????????????????????????????????????????????????????????????????????????????????????????????????????????????????????????????????????????????????????????????????????????????????????????????????????????????????????????????????????????????????????????????????????????????????????????????????????????????????????????????????????????????????????????????????????????????????????????????????????????????????????????????????????????????????????????????????????????????????????????????????????????????????????????????????????????????????????????????????????????????????????????????????????????????????????????????????????????????????????????????????????????????????????????????????????????????????????????????????????????????????????????????????????????????????????????????????????????????????????????????????????????????????????????????????????????????????????????????????????????????????????????????????????????????????????????????????????????????????????????????????????????????????????????????????????????????????????????????????????????????????????????????????????????????????????????????????????????????????????????????????????????????????????????????????????????????????????????????????????????????????????????????????????????????????????????????????????????????????????????????????????????????????????????????????????????????????????????????????????????????????????????????????????????????????????????????????????????????????????????????????????????????????????????????????????????????????????????????????????????????????????????????????????????????????????????????????????????????????????????????????????????????????????????????????????????????????????????????????????????????????????????????????????????????????????????????????????????????????????????????????????????????????????????????????????????????????????????????????????????????????????????????????????????????????????????????????????????????????????????????????????????????????????????????????????????????????????????????????????????????????????????????????????????????????????????????????????????????????????????????????????????????????????????????????????????????????????????????????????????????????????????????????????????????????????????????????????????????????????????????????????????????????????????????????????????????????????????????????????????????????????????????????????????????????????????????????????????????????????????????????????????????????????????????????????????????????????????????????????????????????????????????????????????????????????????????????????????????????????????????????????????????????????????????????????????????????????????????????????????????????????????????????????????????????????????????????????????????????????????????????????????????????????????????????????????????????????????????????????????????????????????????????????????????????????????????????????????????????????????????????????????????????????????????????????????????????????????????????????????????????????????????????????????????????????????????????????????????????????????????????????????????????????????????????????????????????????????????????????????????????????????????????????????????????????????????????????????????????????????????????????????????????????????????????????????????????????????????????????????????????????????????????????????????????????????????????????????????????????????????????????????????????????????????????????????????????????????????????????????????????????????????????????????????????????????????????????????????????????????????????????????????????????????????????????????
Mesoclemmys_heliostemma		??????????????????????????????????????????????????????????????????????????????????????????????????????????????????????????????????????????????????????????????????????????????????????????????????????????????????????????????????????????????????????????????????????????????????????????????????????????????????????????????????????????????????????????????????????????????????????????????????????????????????????????????????????????????????????????????????????????????????????????????????????????????????????????????????????????????????????????????????????????????????????????????????????????????????????????????????????????????????????????????????????????????????????????????????????????????????????????????????????????????????????????????????????????????????????????????????????????????????????????????????????????????????????????????????????????????????????????????????????????????????????????????????????????????????????????????????????????????????????????????????????????????TCTACTTAATCTTCGGCGCCTGAGCAGGAATAGTCGGAACAGCCCTCAGTCTACTAATTCGAACAGAACTTAGCCAACCAGGACCACTCATGGGAGACGACCAAGTATACAACGTCATCGTCACAGCCCATGCCTTCATCATAATTTTCTTCATGGTTATACCAATCATAATTGGTGGNTTTGGCAACTGATTAGTTCCCATAATAATCGGAGCACCAGACATAGCGTTCCCTCGAATGAATAATATAAGCTTCTGACTCCTCCCCCCATCCCTACTACTACTTCTAGCATCATCAGGGGTTGAAGCTGGGGCTGGAACAGGATGAACCGTCTACCCGCCTCTGGCTGGAAACATAGCACACGCCGGCGCCTCTGTAGATTTGACCATCTTTTCCTTACACCTNGCCGGAGCGTCATCAATCTTAGGCGCTATCAACTTTATCACCACAGCAATCAACATAAAAACTCCCTCCATATCACAATACCAAACCCCCCTCTTCGTCTGATCTGTGCTAATCACAGCCGTGTTATTACTCCTATCCCTCCCAGTTCTTGCAGCAGGAATTACTATACTCCTCACAGACCGCAACCTAAATACAACCTTCTTTGATCCCTCCGGTGGCGGAGACCCAATTCTTTATCAACACCTA???????????????????????????????????????????????????????????????????????????????????????????????????????????????????????????????????????????????????????????????????????????????????????????????????????????????????????????????????????????????????????????????????????????????????????????????????????????????????????????????????????????????????????????????????????????????????????????????????????????????????????????????????????????????????????????????????????????????????????????????????????????????????????????????????????????????????????????????????????????????????????????????????????????????????????????????????????????????????????????????????????????????????????????????????????????????????????????????????????????????????????????????????????????????????????????????????????????????????????????????????????????????????????????????????????????????????????????????????????????????????????????????????????????????????????????????????????????????????????????????????????????????????????????????????????????????????????????????????????????????????????????????????????????????????????????????????????????????????????????????????????????????????????????????????????????????????????????????????????????????????????????????????????????????????????????????????????????????????????????????????????????????????????????????????????????????????????????????????????????????????????????????????????????????????????????????????????????????????????????????????????????????????????????????????????????????????????????????????????????????????????????????????????????????????????????????????????????????????????????????????????????????????????????????????????????????????????????????????????????????????????????????????????????????????????????????????????????????????????????????????????????????????????????????????????????????????????????????????????????????????????????????????????????????????????????????????????????????????????????????????????????????????????????????????????????????????????????????????????????????????????????????????????????????????????????????????????????????????????????????????????????????????????????????????????????????????????????????????????????????????????????????????????????????????????????????????????????????????????????????????????????????????????????????????????????????????????????????????????????????????????????????????????????????????????????????????????????????????????????????????????????????????????????????????????????????????????????????????????????????????????????????????????????????????????????????????????????????????????????????????????????????????????????????????????????????????????????????????????????????????????????????????????????????????????????????????????????????????????????????????????????????????????????????????????????????????????????????????????????????????????????????????????????????????????????????????????????????????????????????????????????????????????????????????????????????????????????????????????????????????????????????????????????????????????????????????????????????????????????????????????????????????????????????????????????????????????????????????????????????????????????????????????????????????????????????????????????????????????????????????????????????????????????????????????????????????????????????????????????????????????????????????????????????????????????????????????????????????????????????????????????????????????????????????????????????????????????????????????????????????????????????????????????????????????????????????????????????????????????????????????????????????????????????????????????????????????????????????????????????????????????????????????????????????????????????????????????????????????????????????????????????????????????????????????????????????????????????????????????????????????????????????????????????????????????????????????????????????????????????????????????????????????????????????????????????????????????????????????????????????????????????????????????????????????????????????????????????????????????????????????????????????????????????????????????????????????????????????????????????????????????????????????????????????????????????????????????????????????????????????????????????????????????????????????????????????????????????????????????????????????????????????????????????????????????????????????????????????????????????????????????????????????????????????????????????????????????????????????????????????????????????????????????????????????????????????????????????????????????????????????????????????????????????????????????????????????????????????????????????????????????????????????????????????????????????????????????????????????????????????????????????????????????????????????????????????????????????????????????????????????????????????????????????????????????????????????????????????????????????????????????????????????????????????????????????????????????????????????????????????????????????????????????????????????????????????????????????????????????????????????????????????????????????????????????????????????????????????????????????????????????????????????????????????????????????????????????????????????????????????????????????????????????????????????????????????????????????????????????????????????????????????????????????????????????????????????????????????????????????????????????????????????????????????????????????????????????????????????????????????????????????????????????????????????????????????????????????????????????????????????????????????????????????????????????????????????????????????????????????????????????????????????????????????????????????????????????????????????????????????????????????????????????????????????????????????????????????????????????????????????????????????????????????????????????????????????????????????????????????????????????????????????????????????????????????????????????????????????????????????????????????????????????????????????????????????????????????????????????????????????????????????????????????????????????????????????????????????????????????????????????????????????????????????????????????????????????????????????????????????????????????????????????????????????????????????????????????????????????????????????????????????????????????
Mesoclemmys_tuberculatus	??????????????????????????????????????????????????????????????????????????????????????????????????????????????????????????????????????????????????????????????????????????????????????????????????????????????????????????????????????????????????????????????????????????????????????????????????????????????????????????????????????????????????????????????????????????????????????????????????????????????????????????????????????????????????????????????????????????????????????????????????????????????????????????????????????????????????????????????????????????????????????????????????????????????????????????????????????????????????????????????????????????????????????????????????????????????????????????????????????????????????????????????????????????????????????????????????????????????????????????????????????????????????????????????????????????????????????????????????????????????????????????????????????????????????????????????????????????????????????????????????????????????TCTACCTAATTTTCGGAGCCTGAGCAGGAATGATTGGAACAGCTCTCAGCCAACTAATTCGAACAGAGCTAAGCCAACCTGGCCCGCTCATAGGGGACGACCAGGTATACAACGTCATCGTCACCGCCCATGCCTTCGTCATAATTTTCTTTATAGTCATGCCAGTAATAATCGGCGGATTTGGAAATTGGTTGGTCCCAATAATAATTGGAGCACCAGACATGGCATTCCCTCGAATAAATAACATAAGCTTTTGACTTCTTCCACCATCATTACTCCTACTCTTAGCCTCATCAGGAGTAGAAGCCGGAGCTGGAACAGGATGGACCGTCTATCCCCCCCTAGCTGGAAATATAGCACATGCCGGTGCCTCCGTAGACTTAACCATNTTTTCCCTTCACCTAGCCGGAGCATCATCAATCTTAGGGGCTATTAACTTTATTACTACAGCAATAAATATAAAAACNCCATCAATATCACAGTACCAAACCCCACTATTCGTGTGATCCGTACTTATCACAGCCGTATTACTTCTCCTGTCCCTCCCAGTGCTTGCAGCCGGAATNACTATGCTTCTAACAGATCGAAACCTAAATACAACCTTCTTCGACCCGTCTGGAGGTGGAGACCCAATTCTTTACCAACACCTA???????????????????????????????????????????????????????????????????????????????????????????????????????????????????????????????????????????????????????????????????????????????????????????????????????????????????????????????????????????????????????????????????????????????????????????????????????????????????????????????????????????????????????????????????????????????????????????????????????????????????????????????????????????????????????????????????????????????????????????????????????????????????????????????????????????????????????????????????????????????????????????????????????????????????????????????????????????????????????????????????????????????????????????????????????????????????????????????????????????????????????????????????????????????????????????????????????????????????????????????????????????????????????????????????????????????????????????????????????????????????????????????????????????????????????????????????????????????????????????????????????????????????????????????????????????????????????????????????????????????????????????????????????????????????????????????????????????????????????????????????????????????????????????????????????????????????????????????????????????????????????????????????????????????????????????????????????????????????????????????????????????????????????????????????????????????????????????????????????????????????????????????????????????????????????????????????????????????????????????????????????????????????????????????????????????????????????????????????????????????????????????????????????????????????????????????????????????????????????????????????????????????????????????????????????????????????????????????????????????????????????????????????????????????????????????????????????????????????????????????????????????????????????????????????????????????????????????????????????????????????????????????????????????????????????????????????????????????????????????????????????????????????????????????????????????????????????????????????????????????????????????????????????????????????????????????????????????????????????????????????????????????????????????????????????????????????????????????????????????????????????????????????????????????????????????????????????????????????????????????????????????????????????????????????????????????????????????????????????????????????????????????????????????????????????????????????????????????????????????????????????????????????????????????????????????????????????????????????????????????????????????????????????????????????????????????????????????????????????????????????????????????????????????????????????????????????????????????????????????????????????????????????????????????????????????????????????????????????????????????????????????????????????????????????????????????????????????????????????????????????????????????????????????????????????????????????????????????????????????????????????????????????????????????????????????????????????????????????????????????????????????????????????????????????????????????????????????????????????????????????????????????????????????????????????????????????????????????????????????????????????????????????????????????????????????????????????????????????????????????????????????????????????????????????????????????????????????????????????????????????????????????????????????????????????????????????????????????????????????????????????????????????????????????????????????????????????????????????????????????????????????????????????????????????????????????????????????????????????????????????????????????????????????????????????????????????????????????????????????????????????????????????????????????????????????????????????????????????????????????????????????????????????????????????????????????????????????????????????????????????????????????????????????????????????????????????????????????????????????????????????????????????????????????????????????????????????????????????????????????????????????????????????????????????????????????????????????????????????????????????????????????????????????????????????????????????????????????????????????????????????????????????????????????????????????????????????????????????????????????????????????????????????????????????????????????????????????????????????????????????????????????????????????????????????????????????????????????????????????????????????????????????????????????????????????????????????????????????????????????????????????????????????????????????????????????????????????????????????????????????????????????????????????????????????????????????????????????????????????????????????????????????????????????????????????????????????????????????????????????????????????????????????????????????????????????????????????????????????????????????????????????????????????????????????????????????????????????????????????????????????????????????????????????????????????????????????????????????????????????????????????????????????????????????????????????????????????????????????????????????????????????????????????????????????????????????????????????????????????????????????????????????????????????????????????????????????????????????????????????????????????????????????????????????????????????????????????????????????????????????????????????????????????????????????????????????????????????????????????????????????????????????????????????????????????????????????????????????????????????????????????????????????????????????????????????????????????????????????????????????????????????????????????????????????????????????????????????????????????????????????????????????????????????????????????????????????????????????????????????????????????????????????????????????????????????????????????????????????????????????????????????????????????????????????????????????????????????????????????????????????????????????????????????????????????????????????????????????????????????????????????????????????????????????????????????????????????????????????????????????????????????????????????????????????????????????????????????????????????????????????????????????????????????????????????????????????????????????????????????????????????????????????????????????????????????????????????????????????????????????????????????????????????????
Rhinemys_rufipes		??????????????????????????????????????????????????????????????????????????????????????????????????????????????????????????????????????????????????????????????????????????????????????????????????????????????????????????????????????????????????????????????????????????????????????????????????????????????????????????????????????????????????????????????????????????????????????????????????????????????????????????????????????????????????????????????????????????????????????????????????????????????????????????????????????????????????????????????????????????????????????????????????????????????????????????????????????????????????????????????????????????????????????????????????????????????????????????????????????????????????????????????????????????????????????????????????????????????????????????????????????????????????????????????????????????????????????????????????????????????????????????????????????????????????????????????????????????????????????????????????????????????TCTACCTAATCTTCGGCGCCTGAGCAGGAATAATTGGCACAGCCCTCAGCCTACTAATTCGAACAGAACTAAGCCAACCTGGCCCACTCATAGGAGACGACCAAGTATACAACGTTATCGTCACATCCCATGCCTTTGTCATAATCTTCTTCATAGTTATACCAATAATGATCGGAGGATTTGGAAACTGATTACTCCCAATAATAATTGGAGCACCAGACATAGCATTCCCTCGAATAAATAACATAAGCTTCTGACTACTCCCACCGTCATTACTACTACTTCTAGCTTCATCAGGAGTAGAAGCTGGGGCTGGAACAGGGTGAACCGTCTATCCGCCTCTAGCTGGAAACATAGCACATGCCGGCGCCTCTGTAGACTTGACTATTTTTTCCCTACATCTAGCCGGAGCATCATCAATCCTGGGTGCTATCAACTTTATTACCACGACAATTAATATAAAAACCCCATCCATATCACAATACCAAACCCCCCTCTTCGTATGATCTGTACTTATTACAGCCGTATTACTACTCCTATCCCTCCCAGTACTTGCAGCAGGAATCACTATGCTCCTAACAGACCGAAACCTGAATACAACCTTCTTTGATCCATCTGGGGGTGGAGATCCAATCCTTTATCAACACCTA???????????????????????????????????????????????????????????????????????????????????????????????????????????????????????????????????????????????????????????????????????????????????????????????????????????????????????????????????????????????????????????????????????????????????????????????????????????????????????????????????????????????????????????????????????????????????????????????????????????????????????????????????????????????????????????????????????????????????????????????????????????????????????????????????????????????????????????????????????????????????????????????????????????????????????????????????????????????????????????????????????????????????????????????????????????????????????????????????????????????????????????????????????????????????????????????????????????????????????????????????????????????????????????????????????????????????????????????????????????????????????????????????????????????????????????????????????????????????????????????????????????????????????????????????????????????????????????????????????????????????????????????????????????????????????????????????????????????????????????????????????????????????????????????????????????????????????????????????????????????????????????????????????????????????????????????????????????????????????????????????????????????????????????????????????????????????????????????????????????????????????????????????????????????????????????????????????????????????????????????????????????????????????????????????????????????????????????????????????????????????????????????????????????????????????????????????????????????????????????????????????????????????????????????????????????????????????????????????????????????????????????????????????????????????????????????????????????????????????????????????????????????????????????????????????????????????????????????????????????????????????????????????????????????????????????????????????????????????????????????????????????????????????????????????????????????????????????????????????????????????????????????????????????????????????????????????????????????????????????????????????????????????????????????????????????????????????????????????????????????????????????????????????????????????????????????????????????????????????????????????????????????????????????????????????????????????????????????????????????????????????????????????????????????????????????????????????????????????????????????????????????????????????????????????????????????????????????????????????????????????????????????????????????????????????????????????????????????????????????????????????????????????????????????????????????????????????????????????????????????????????????????????????????????????????????????????????????????????????????????????????????????????????????????????????????????????????????????????????????????????????????????????????????????????????????????????????????????????????????????????????????????????????????????????????????????????????????????????????????????????????????????????????????????????????????????????????????????????????????????????????????????????????????????????????????????????????????????????????????????????????????????????????????????????????????????????????????????????????????????????????????????????????????????????????????????????????????????????????????????????????????????????????????????????????????????????????????????????????????????????????????????????????????????????????????????????????????????????????????????????????????????????????????????????????????????????????????????????????????????????????????????????????????????????????????????????????????????????????????????????????????????????????????????????????????????????????????????????????????????????????????????????????????????????????????????????????????????????????????????????????????????????????????????????????????????????????????????????????????????????????????????????????????????????????????????????????????????????????????????????????????????????????????????????????????????????????????????????????????????????????????????????????????????????????????????????????????????????????????????????????????????????????????????????????????????????????????????????????????????????????????????????????????????????????????????????????????????????????????????????????????????????????????????????????????????????????????????????????????????????????????????????????????????????????????????????????????????????????????????????????????????????????????????????????????????????????????????????????????????????????????????????????????????????????????????????????????????????????????????????????????????????????????????????????????????????????????????????????????????????????????????????????????????????????????????????????????????????????????????????????????????????????????????????????????????????????????????????????????????????????????????????????????????????????????????????????????????????????????????????????????????????????????????????????????????????????????????????????????????????????????????????????????????????????????????????????????????????????????????????????????????????????????????????????????????????????????????????????????????????????????????????????????????????????????????????????????????????????????????????????????????????????????????????????????????????????????????????????????????????????????????????????????????????????????????????????????????????????????????????????????????????????????????????????????????????????????????????????????????????????????????????????????????????????????????????????????????????????????????????????????????????????????????????????????????????????????????????????????????????????????????????????????????????????????????????????????????????????????????????????????????????????????????????????????????????????????????????????????????????????????????????????????????????????????????????????????????????????????????????????????????????????????????????????????????????????????????????????????????????????????????????????????????????????????????????????????????????????????????????????????????????????????????????????????????????????????????????????????????????????????????????????????????????????????????????????????????????????????????????????????????????????????????
Erymnochelys_madagascariensis	CCCTAATTCTCAGATATTTAC--TTACATGAA-TATCCGCCAGAGAA-CTACAAGCAAAATGCTCGAAACTCAAGGGACTTGACGG-TGTCTCAAA-CCCCCCTAGAGGAGCCTGTTCTATAAGCGATAATCCACGATAAACCTTACCACCTCTTGCCC-ATCAGCCTATATACCGCCGTCTCTAGCCTACCTTGTGAAAGATC-AAAAGTTAGCACAATAGTCCACTACAA--CTAAAAAGTCAGGTCCAGGTGTAGCCAA-TGAGGTGGAAGAAATGGGCTACATTTTCTAACA--TAGATATA---GTCA-C---GGAAAGAACCCTGAAA--C-AAGGTCTAAGAAGCTGAATTTAGCAGTAATTTT-GAAACAGAGAGTCAAAATTAAGTAGGATATGG-GAC????????????????????????????????????????????????????????????TTTAACGGTCG-CGGTATCCTGACCGTGCGAAGGTAGCATAATCACTTGTCTTTTAAATAAAGACTAGAATGAATGGCTAAACGAG-GTTCTCCCTGTCTCTTACAAA-CAATCAGTGAAATTGATTTTACTGTGCAAAAGCAGTAATATCCCCATAAGACGAGAAGACCCTGTGGRACTTTAAGA-ACTAATCAGCGAGCCAAATTTAACTACCCCTCTCCCCATGGGTCCACATTAAACATT-----CCCCTGATTATTACTTTCGGTTGGGGCGACCTCGGAGAACAATAAAACCTCCGAAGATAGGGCTATTTCTCCTAATTAAGA-ATGACATTTCAAAATACCACTAGGTCCCAAATGATCCAATATTTTTGATCAACGAACAAAGCTACCCCAGGGATAACAGCGCAATCCCCCTTCAGAGT-TCATATCAACAG-GGGGGTTTACGACCTCGATGTTGGATCAGRACATCCTA?????????????????????????TTTACTTACTCTTCGGTGCCTGAGCAGGTATAGTAGGAACTGCCCTTAGCCTCCTTATTCGAGCAGAATTAAGTCAACCAGGTACACTCCTTGGAGATGACCAAACCTACAACGTCATTGTGACAGCCCATGCATTCGTCATAATTTTCTTCATAGTCATACCTATTATAATTGGAGGATTTGGAAATTGACTAGTTCCATTAATAATTGGAGCCCCAGACATAGCGTTCCCTCGAATAAACAACATAAGTTTCTGACTTCTCCCACCATCACTCTTACTTCTACTTGCATCATCTATCATCGAATCTGGAGCTGGGACAGGATGAACTGTTTATCCACCATTAGCAGGAAACCTAGCCCATGCTGGAGCATCAGTAGATCTAACCATCTTCTCTCTACACCTAGCTGGAGCATCATCAATTCTAGGTGCTATTAACTTCATCACTACCATTATCAATATAAAATCCCCCTCCATAACACAATACCAAATACCATTATTTGTATGATCAGTCCTAATCACTGCAGTATTACTCCTACTATCTCTACCAGTTCTAGCTGCAGGAATTACAATACTTCTTACTGATCGGAACCTAAACACAACATTTTTTGACCCATCAGGAGGAGGAGACCCAATTTTGTATCAACATTTG?????????????????????????????????????????????????????????????????????????GGGGATATGGGCTCAGCCGAACAACACTCATCCTTAATCCAATTAACAAAAACCCTATCATACCCCTTCATAATTCTATCATTATGAGGAATTATTATAACAGGCCTAATTTGTTTACGACAAACTGACCTAAAATCTTTAATCGCTTACTCATCCGTCAGTCATATAGGGTTAGTAATCGCTGCTATTCTAACACAAACTCAATGAGCCATAACAGGAAGTGTTATTCTCATAATCGCCCACGGATTAACATCATCAATATTATTCTGTCTAGCTAACACAAATTACGAACGAACACACAGCCGAACCCTCCTTCTCACACGAAATCTTCAATTATTCCTACCCCTTATATCTTTATGATGACTTCTAGCAAGCTTATCCAATATAGCCCTACCACCATCAATTAATCTTATAGGGGAACTATCAATTATCATAACATTATTCGCCTGATCAAAAACCACACTTATCATCACAGGCTTAGGTACCCTAATCACAGCAACCTACTCCCTACACATATTCCTTACCTCACAATGAGGAGGAAACCCACCATACCAC---TTAATCACAATCCCACCCAACCAGACACGAGAACACCTCCTCATAACCCTACATATTATCCCCCTTATGCTATTGATACTGAAACCGCAACTCATCTCAAACAGCATATGTTAACATAGTTTAATAAAACACACTAGATTGTGGATCTAGAAATAGAGG??????????????????????????????????????????????????????????????????????????????TGATGAAACTTCGGCTCACTATTAGGAATATGCCTAATTCTACAAATCACAACCGGACTATTCCTAGCCATCCACTATTCACCAGACATCCACTTAGCCTTCTCATCAGTAGCCCACATCATACGAGACGTCCAACACGGATGACTAATTCGAAACATACATGCTAACGGAGCATCCCTGTTCTTCATATGTCTATACTTACATATTGGGCGAGGAATATACTACGGATCCTTCCTAAACATTAAAACATGAAACACGGGAATCATACTACTATTTCTAACAATAGCTACAGCATTTATAGGTTACATCCTTCCATGAGGACAAATATCATTTTGAGGCGCTACCGTCATCACTAACCTATTATCAGCTATACCATACATTGGGACTTCATTAGTTCAATGAGTATGAGGCGGATTCTCAGTAGACAATGCTACCTTAACCCGATTCTTTTCATTCCATTTCATCACCCCATTTATAATATCAGGAATAACCATAATTCACCTTCTATTCCTCCACGAAATAGGATCAAACAACCCAACAGGACTAAACTCTAACACTGATAAAATCCCATTTCACCCCTACTTCTCATACAAAGACATCCTAGGTTTCACAATCCTAATTCTCATCCTCCTGTCACTATCTATATTCTTACCAAACCTCCTATCAGACCCAGAAAATTTCACACCAGCAAACCCCCTAGTAACCCCGCCACATATTAAGCCAGAATGATACTTTTTATTCGCATATGCTATTTTACGCTCAATTCCAAATAAACTAGGAGGTGTCCTAGCATTACTTATATCAATCGCAATCCTACTCCTTATCCCCATACTCCACACATCCAAACTACGAACAATATCATACCGACCCATAACACAAATCCTATTCTGAACCATAATTTCCGATCTAGTTATCCTAACCTGAATCGGAGGACAACCAGTAGATCCACCATACATTATCATTGGCCAAATCGCTTCATTATTATACTTCACAACAATCCTAATCCTAATTCCAATCACAGGTATTGTAGAAAATAA--ACTAACT???????????????????????????????????????????????????????????????????????????????????????????????????????????????????????????????????????????????????????????????????????????????????????????????????????????????????????????????????????????????????????????????????????????????????????????????????????????????????????????????????????????????????????????????????????????????????????????????????????????????????????????????????????????????????????????????????????????????????????????????????????????????????????????????????????????????????????????????????????????????????????????????????????????????????????????????????????????????????????????????????????????????????????????????????????????????????????????????????????????????????????????????????????????????????????????????????????????????????????????????????????????????????????????????????????????????????????????????????????????????????????????????????????????????????????????????????????????????????????????????????????????????????????????????????????????????????????????????????????????????????????????????????????????????????????????????????????????????????????????????????????????????????????????????????????????????????????????????????????????????????????????????????????????????????????????????????????????????????????????????????????????????????????????????????????????????????????????????????????????????????????????????????????????????????????????????????AGGCCTCTTGCCAGGTTATCATCCATTCGAGTGGAACCCTCCTTTGAAAAATGTRTCCACTAAYACAGAAGTRGGAATTATWGATGGGCTGTCAGGGCTGCCACASTCAGTTGATGAYTACCCAGTAGACACRATTGCCAAGAGGTTTCGRTATGAYGCAGCCTTAGTTTCTRCCTTAATGGAYWTRGAGGAAGACATCTTGGAAGGRATGAAGGCCMAAGACCTGGATGACTACTTGAATGGTCCCTTCACTGTGGTGGTGAARGARTCTTGYGATGGGATGGGWGATGTCAGTGAGAAACATGGAAGTGGGCCRSCTGTTCCTGAGAAGGCMGTTCGATTTTCTTTCACACTCATGAGCATYRCTRTAGCTCATGGCAATGAAAAYRTAAGGATCTTTGAAGAAACMAAACCTAATTCAGAGCTGTGTTGCAAACCCCTGTGTCTTATGCTGGCTGATGAATCRGACCATGAGACTCTSACAGCYATCTTGAGCCCTSTCATAGCAGAAAGRGAGACCATGAAAACCAGTSTYCTGCTTCTTGAAATGGGAGGCATCCTCAGAACATTCAAATTCATCTTTAGAGGTACAGGGTATGATGAGAAACTTGTCCGTGAAGTGGAAGGCCTTGAAGCCTCAGGYTCTACTTAYATCTGCACCCTTTGTGATGCAACCCGCCTGGAAGCTTCTCAGAACTTGGTCCTTCACTCCATAACAAGAAGYCATGCTGAAAAYCTAGAACGGTATGAGGTATGGAGGTCCAACCCATATCATGAATCTGTTGATGAGCTACGTGACAGAGTGAAGGGTGTTTCTGCCAAACCTTTTATTGAGACWGTTCCTTCYATAGATGCWTTGCATTGTGAYATCGGCAATGCAGCTGAATTCTACAAGATATTCCAGTTTGAGATAGGTGARGTGTACAAGAACCCTGACACATCTAAAGAAGARAGGAAGAGGTGGCAGTCAACTCTTGACAARCACCTCAGGAAGAAGATGAATCTGAAGCCCATAATGAGGATGAATGGRAACTTTGCTAGAAARCTTATGACMAAAGAGACWGTGGAAGCAGTCTGTGAATTAATAAAGTGTGAGGAAAGGCATGAAGCCTTAAGAGAACTRATGGACCTTTACCTTAAGATGAARCCAGTSTGGAGGTCTTCCTGCCCAGCCAAAGAGTGCCCAGAATTGYTGTGTCAGTATAGCTTCAACTCACAACGTTTTGCTGAGCTMCTRTCSACAAAGTTCAAGTAYAGATATGARGGCAAGATTACRAATTACTTTCACAAAACTCTTGCTCATGTTCCTGAAATCATAGAAAGAGATGGCTCCATTGGGGCSTGGGCAAGTGAAGGGAATGAGTCTGGGAACAAA???????????????????????????????????????????????????????????????????????????????????????????????????????????????????????????????????????????????????????????????????????????????????????????????????????????????????????????????????????????????????????????????????????????????????????????????????????????????????????????????????????????????????????????????????????????????????????????????????????????????????????????????????????????????????????????????????????????????????????????????????????????????????????????????????????????????????????????????????????????????????????????????????????????????????????????????????????????????????????????????????????????????????????????????????????????????????????????????????????????????????????????????????????????????????????????????????????????????????????????????????????????????????????????????????????????????????????????????????????????????????????????????????????????????????????????????????????????????????????????????????????????????????????????????????????????????????????????????????????????????????????????????????????????????????????????????????????????????????????????????????????????????????????????????????????????????????????????????????????????????????????????????????????????????????????????????????????????????????????????????????????????????????????????????????????????????????????????????????????????????????????????????????????????????????????????????????????????????????????????????????????????????????????????????????????????????????
Pelusios_sinuatus		CCCTAAATCA-TGATATTCCACATAACATAAA-TATCCGCCCGAGAA-CTACGAGCTTATAGCTTAAAACTCAAAGGACTTGGCGG-TGTCCCATNACCCTACTAGAGGAGCCTGTTCTACAAGCGATAATCCACGATAAACCTTACCACCCTTTGCCA-TNCAGCCTATATACCGCCGTCTACAGCTTACCTTATGAAAGCTA-AAAAGTAAGCAAAATAGCCCATTACAG--CTAGAAAGTCAGGTCCAGGTGTAGCCAA-TAGGGTGGGTGCAATGGGCTACATTTTCTAAAA--TAGAAATN---TTCA-C---GAACAGACCCTTGAAA--TTAGGGTCTTAGAAGTAGGATTTAGCAGTAATTTA-GGAATAGAGAGCCTATATTAAGCCGGCCCTGG-GAC?????????????????????????????????AGAGGTAMTGCCTGTCCAGYGATCC-ATTAAACGGTCG-YGGTAACATGACCGCGCGAAGGTAGCATAATCAATTGTCTTTTAAACAGAGACTGGAATGAATGGCCATACGAG-GTTCTATCTGTCTCTTACAAA-CAATCAGTGAAATTGATCTCCTCGTGCAAAAGCGAGAATGTCCCCATAAGACGAGAAGACCCTGTGGAACTTCAAGT-ATTAACCAATAT-ACTTTTACACCTCTAC----CCTAAGGGAAAGAAATAAAATTTAAGTATCTCCTGGTTATTCCTTTTGGTTGGGGCGACCTCGGAGTAAAACAAAACCTCCGAAAAGAGTAT--T---CTCATACTAAGA-ATAACACCTCAAAGTGCC-TTAAAGCA-AAACGATCCAATATATTTGATCAGCGAACAAAGCTACCCCAGGGATAACAGCGCAATCCCTTCTTAAAGC-CCGTATTAACGATGGGGGTTTACGACCTCGATGTTGGATCAGGACATCCTAATGGTGCAKCAGCTATTAAGGGTC????????????????????????????????????????????????????????????????????????????????????????????????????????????????????????????????????????????????????????????????????????????????????????????????????????????????????????????????????????????????????????????????????????????????????????????????????????????????????????????????????????????????????????????????????????????????????????????????????????????????????????????????????????????????????????????????????????????????????????????????????????????????????????????????????????????????????????????????????????????????????????????????????????????????????????????????????????????????????????????????????????????????????????????????????????????????????????????????????????TACTAAAACTAGGAGGGTATGGAATTATCCGAATAACCTTAATACTTAACCCATTAACCAAAT-CACTTAGCTACCCATTCATAACCCTCTCTTTATGAGGTATTATTATAACAGGCCTAATCTGCCTACGCCAAACAGACCTAAAATCACTAATCGCCTACTCTTCAGTAGGCCACATGGGATTAGTAATTTCAGCAGCACTCCTACAAACACCATTATCAATTACAGGAGCCATTATCCTAATAATCGCTCATGGTCTATCATCCTCCATACTCTTTTGTTTAGCTAATACAAACTACGAGCGAACCCATAATCGAACCTTACTATTAACACGCAGTATACAAACTCTTATACCCTTAATAACCCTTTGATGACTATTAGCCAATTTAATAAATATAGCCCTACCTCCAACAATCAACCTTATAGGAGAACTAACAATCATTGCATCACTATTCAATTGAGCTAACATTACCATCGTACTTACCGGATTAGGCACACTAATCTCAGCCCTCTATTCACTTCACATATTCTCATCAACACAATGAGGAGGAACCCCCCCATCGCAC---ATACACACTATTACCCCCTCCCATACTCGAGAACACTTAATTATAACCCTCCACATCACCCCTTTAATTTTACTAATAATAAAACCCCAACTCAT----AACCACTTA-GTTAGTATAGTTTCAACA--AACATTAGAATGTGAGCCTAAAATTAGAGG???????????????????????????????????????????????????????????????????????????????????????????????????????????????????????????????????????????????????????????????????????????????????????????????????????????????????????????????????????????????????????????????????????????????????????????????????????????????????????????????????????????????????????????????????????????????????????????????????????????????????????????????????????????????????????????????????????????????????TTTAGTTCAATGAATCTGAGGAGGGTTTTCAGTAGACAACGCAACCCTTACCCGCTTCTTCACCCTACACTTCCTCACCCCCTTTATTATCGCCAGCCTCTCCATAATTCATCTCCTATTTCTCCATGAAACAGGCTCTAACAATCCTACAGGGCTCAACTCCAACTCTGATAAAATCCCATTTCATCCCTACTTCTCATACAAAGACCTTCTAGGAATAAGCTTACTTATAACAGGACTACTAATCCTAACCCTCTTCCTACCTAACCTCCTAACAGACCCAGAAAACTTCACACCAGCCAATCCCTTAGTCACCCCACCACATATCAAACCCGAATGATATTTTCTCTTTGCCTACGCTATCCTACGCTCTATTCCAAACAAATTAGGAGGAGTATTAGCCCTTCTAGCATCAGTAGCTATCCTCTTCCTTATACCCACCCTACACACCTCCAAACAACGATCAGCTACCTTCCGACCATTCACCCAAATCCTTTTATGATCTCTAACTGCTGATCTAATTATCCTCACTTGAATTGGAGCTCAACCTGTAGAAGACCCATTCATCATAATCGGACAAGCAGCCTCCATCTTCTACTTCACCTTAATCCTATTTATAATACCCCTAACAGCCCACCTTGAAAATAA--ACTCCTAAGCT????????????????????????????????????????????????????????????????????????????????????????????????????????????????????????????????????????????????????????????????????????????????????????????????????????????????????????????????????????????????????????????????????????????????????????????????????????????????????????????????????????????????????????????????????????????????????????????????????????????????????????????????????????????????????????????????????????????????????????????????????????????????????????????????????????????????????????????????????????????????????????????????????????????????????????????????????????????????????????????????????????????????????????????????????????????????????????????????????????????????????????????????????????????????????????????????????????????????????????????????????????????????????????????????????????????????????????????????????????????????????????????????????????????????????????????????????????????????????????????????????????????????????????????????????????????????????????????????????????????????????????????????????????????????????????????????????????????????????????????????????????????????????????????????????????????????????????????????????????????????????????????????????????????????????????????????????????????????????????????????????????????????????????????????????????????????????????????????????????????????????????????????????????????????????????????????????????????????????????????????????????????????????????????????????????????????????????????????????????????????????????????????????????????????????????????????????????????????????????????????????????????????????????????????????????????????GGTCCCTTCACTGTGGTGGTGAAGGAATCTTGTGATGGGATGGGAGATGTCAGTGAGAAACATGGAAGTGGGCCGGCTGTTCCTGAGAAGGCAGTTCGATTTTCTTTCACACTCATGAGCATCACTATAGCTCATGGCAATGAAAATGTAAGGATCTTTGAAGAAACCAAACCTAATTCAGAGCTGTGTTGCAAACCCCTGTGTCTTATGCTGGCTGATGAATCAGACCATGAGACTCTCACAGCTATCTTGAGCCCTGTCATAGCAGAAAGAGAGACCATGAAAAACAGTCTCCTGCTTCTTGAAATGGGAGGCATCCTCAGAACATTCAAATTCATCTTTAGGGGTACAGGGTATGATGAGAAACTTGTCCGTGAAGTGGAAGGCCTTGAAGCCTCAGGCTCTACTTACATCTGCACCCTTTGTGATGCAACCCGCCTGGAAGCCTCTCAGAACTTGGTCCTCCACTCCATAACAAGAAGTCATGCTGAAAACCTGGAACGGTATGAGGTATGGAGGTCCAACCCATATCATGAATCTGTTGATGAGCTACGTGACAGAGTGAAGGGTGTTTCTGCCAAACCTTTTATTGA????????????????????????????????????????????????????????????????????????????????????????????????????????????????????????????????????????????????????????????????????????????????????????????????????????????????????????????????????????????????????????????????????????????????????????????????????????????????????????????????????????????????????????????????????????????????????????????????????????????????????????????????????????????????????????????????????????????????????????????????????????????????????????????????????????????????????????????????????????????????????????????????????????????????????????????????????????????????????????????????????????????????????????????????????????????????????????????????????????????????????????????????????????????????????????????????????????????????????????????????????????????????????????????????????????????????????????????????????????????????????????????????????????????????????????????????????????????????????????????????????????????????????????????????????????????????????????????????????????????????????????????????????????????????????????????????????????????????????????????????????????????????????????????????????????????????????????????????????????????????????????????????????????????????????????????????????????????????????????????????????????????????????????????????????????????????????????????????????????????????????????????????????????????????????????????????????????????????????????????????????????????????????????????????????????????????????????????????????????????????????????????????????????????????????????????????????????????????????????????????????????????????????????????????????????????????????????????????????????????????????????????????????????????????????????????????????????????????????????????????????????????????????????????????????????????????????????????????????????????????????????????????????????????????????????????????????????????????????????????????????????????????????????????????????????????????????????????????????????????????????????????????????????????????
Podocnemis_unifilis		CCCTAAACCT-AGATATCTAC--CTACAAAGA-TATCCGCCAGAGAA-CTACAAGCTAAATGCTCAAAACTCAAAGGACTTGACGG-TGCTTCAAA-CCCACCTAGAGGAGCCTGTTCTATAAGCGATAACCCACGATAAACCTTACCATCCCTTGCTC-CC-AGCCTATATACCGCCGTCTCCAGCTCACCTTATGAAAGAAA-AAAAGTAAGCTCAATAGTCCA-TACAA--CTAAAAAGTCAGGTCGAGGCGTAGCCAA-TGAGATGGAAGCAATGGGCTACATTTTCTAAAA-ATAGAAATA---GTCA-C---GGAGAGAATCCTGAAA--A-AAGATCTCAAAAGTAGAATTTAGCAGTAATTTT-GGAATAGTGAGCCAAAATTAAACAGGAAATGA-AGCACGTACATACCGCCCGTCACCCTCCTCAAAAA?AGAGGTGATGCCTGCCCAGTGATTA-ATTAAACGGCCG-CGGTATCCTGACCGTGCGAAGGTAGCATAATCGCTTGTCTTTTAAATAAAGACTAGAATGAATGGCTAAACGAG-GTTCTATCTGTCTCTTACAAA-CAATCAGTGAAATTGATCTACTCGTGCAAAAGCGAGTATACTCCCATAAGACGAGAAGACCCTGTGGAACTTCAAGA-AATAATCAGCTT-TCATATATTACTAT------CCCTACGGGATCACATCAAATTTT-----CCC-TGATTACTACTTTCGGTTGGGGCGACCTCGGAGTACAACAAATCCTCCGAAAATAGGACATATAATCCATACTAAGA-GTTACACCCCAAAGTACTAACAAAGTAAAAGCGATCCAATAAATTTGATCAACGAACAAAGCTACCCCAGGGATACCAGCGCAATCCCCTTTTAGAGT-TCATATCAACAA-GGGGATTTACGACCTCGATGTTGGATCAGGACATCCTAATGGTGCAGCAGCTATTAAGGGTTCTATATCTAATCTTTGGGGCCTGAGCAGGTATAGTAGGCACTGCCCTAAGCCTACTAATTCGAGCAGAATTAAGCCAACCGGGGACTCTCCTAGGAGATGACCAAACCTACAATGTTATTGTTACCGCCCATGCTTTTGTCATGATTTTCTTTATAGTAATACCAATTATGATTGGAGGATTCGGAAACTGACTAGTCCCATTAATAATTGGTGCTCCAGACATAGCATTTCCCCGAATAAATAACATAAGCTTCTGACTTCTCCCACCATCACTCCTCCTTCTACTCGCTTCAGCTGTCATTGAATCTGGAGCTGGAACAGGATGAACTGTTTACCCCCCATTAGCAAGCAACATAGCCCATGCCGGTGCCTCTGTAGACCTAACCATCTTTTCCCTTCACCTAGCCGGTGCCTCATCCATTCTAGGTGCTATCAACTTTATTACTACTACAATCAATATAAAAGCTCCATCAATAACCCAATACCATACCCCATTATTCGTATGATCTGTACTAATTACTGCAGTCTTATTACTATTATCCCTACCTGTCCTAGCAGCAGGCATCACAATGTTACTCACCGACCGGAACCTAAACACAACATTCTTTGACCCTTCTGGAGGAGGTGACCCAATCCTATATCAACATCTATGACTCCCAAAAGCACATGTGGAAGCCCCTATCGCTGGATCCATAATCTTAGCCGGAGTCCTTCTTAAACTAGGTGGTTACGGTATCGCTCGCATAACACTTATTCTCAATCCC-ATCACAAGCTCACTATGCTACCCTTTTATAATCCTTTCACTTTGAGGTATTATCATAACAGGACTAATCTGCACACGACAAACAGACTTAAAATCCCTAATTGCTTATTCATCAGTAAGCCATATAGGCCTAGTAATTGCTGCCTTACTAGTACAAACCCCTTGAGCCTTCACCGGAAGTATCATCTTAATAATTGCCCATGGACTAACATCATCTATACTCTTCTGCCTGGCTAACACAAATTACGAACGAACTCATAGCCGAACATTACTACTAACCCGAAACTTACAACTACTCATACCATTAATAACTCTATGATGATTATTAGCAGGCCTAACTAACATAGCCCTCCCACCAACAATTAACTTAATAGGAGAACTCGCAATCATCATATCATTATTTTCCTGAGCCCATATAACCATTATTCTTACAGGGTTGGGCTCTTTATTAGCTGCAATTTATACACTACACATATTTCTATCTACCCAATGAGGCGGAAACCTACCACCCCAT---TTAACATCTATTATACCCTCCCACACACGAGAACACCTACTCATAGCTCTTCACATCCTCCCATTAACCCTACTAATAATAAAACCTCAACTCATCTCAAATTGCATAT??????????????????????????????????????????????????ACCACAAACA-AAACCCACTAATCAAAATCATTAACCATTCTCTTGTCGATCTTCCAAGTCCATCAAACATTTCCGCTTGATGAAATTTCGGCTCCTTACTAGGAGCCTGCCTTGTACTACAAATTATAACAGGAATTTTCCTAGCAATACACTATTCACCAAACATCCACCTAGCATTCTCATCAGTAGCCCATATCACCCGAGACGTACAATATGGCTGATTAATTCGCAACATACACTCAAACGGTGCCTCCATATTCTTCATCTGTTTATATCTACATATTGGACGAGGCTTCTATTACGGTTCCTTTCTTAACACAAAAACATGGAATACAGGCATCATCCTCCTATTCCTCACTATAGCCACTGCATTCATAGGCTATATCCTACCATGAGGACAAATATCTTTTTGAGGTGCTACCGTCATCACTAACCTCCTGTCAGCTATCCCCTACATCGGACATACTCTTGTACAATGAGTTTGAGGAGGATTCTCAGTAGATAACGCTACACTTACCCGATTCTTCACATTCCACTTCCTAACCCCATTCATCATCGCAGGTTTTACAATAATCCATCTCTTATTCCTCCACGAAACAGGCTCAAACAATCCCACTGGATTAAACTCAAACACCGACAAAATCCCATTTCACCCATACTTCACATACAAAGACATCCTAGGAATTACAATCCTAATAACCTTCTTTCTAACCCTATCTATATTCCTACCTAACCTCCTATCAGACCCCGAAAACTTCACACCTGCAAATCCCCTAGTCACTCCACCCCATATCAAACCAGAATGATACTTCTTATTTGCCTATGCAATCTTACGATCTATTCCAAACAAACTTGGAGGCGTCTTAGCCCTCTTCCTATCAATCGCAATCCTAGTCCTTATCCCCATACTCCACACCTCCAAACAACGAACCTTCACATACCGCCCCATTTCACAAACCCTATTTTGATATCTAGTCGCCGACCTTCTTATCCTCACCTGAATTGGTGGACAACCTGTAGAAACACCATTCATTTTAATTGGCCAAGTTGCTTCAACCTTATACTATGTAACAATCATCATCTTACTTCCCCTCACAGGACTTATCGAAAACAACTACTCTTCAACTGCAAATGAAAAGAAAGCAGAGGAGGTGGCCTCTTTGGACAAAGACATTGTGGTGCAGAAGGATGT---GGCAGTTCCAATGGCAGAAAAACCCCTTCTGCCAGATACAGACTTAAAGTACAACAAGCAGGCTCTTGAAAAAGATGCTGACAACCTGAAAATGCAAGAGAATGCAGCTCATCAAGCAAACCTGCAGCAGCTCTGTCGCATCTGTGGAGTTTCATTTAAAACTGATCACTATAAGAGAAGTTATCCAGTGCATGGGCCAGTGGACAGTGAAACTCAGGGACTTCTGAGAAAGAAAGAGAAAAGAGCAACATCTTGGCCTGATCTTATTGCTAAAGTTTTTAAGATTGATGTGCGAGGAGATATTGACATGATCCACCCCACTCGCTTTTGTCACAACTGCTGGAGCATCATCCATAGAAAGTTCAGCAATGCACCATGTGAAGTATATTTCCCAAGGAACAACACCATGGAATGGCAGTCCCACTCCCCAGATTGCACTGTTTGCTTCACGGCTCAGCGTGGGATCAAGAGAAAGAATCAGTCATCCAACTTGCTGCTCAGCAAAAGGTTGAAGATGATTGCAGAACGTGCCCCAAAAACTAGAAGTGTAAAAAAAACACAAGCACAGATGAAAAATAAAAACCTGATGAAAAAGATTGCCAACTGCAAAAAGACACATCTTAGTACTAAACTTCTTGCAGTTGACTACCCTGCTGATTTCATTAA-GTCCATCTCTTGCCAGGTCTGTGAGCATATTCTGGCAGATCCAGTGGAAACAACATGTAGCCACTTGTTCTGTAGTACCTGCATCCTGAAATGCCTGAAAGTTATGGGCAGCTATTGTCCCTCCTGCCGATACCCTTGCTTCCCTACTGACTTGGAGAGTCCAGTGAAATCCTTTCTGAACATCCTCAATTCCCTGGCTATACGCTGTCCAGTGAAAGAATGTGATGAGGAGGTTTTGCTGGGTAAATACTGCCATCATTTGTCCATTCACAAAGAGGTGAAAAGAAAAGAAATTTACACACACATAAACAAAGGCGGCAGACCAAGGCAACACTTACTGTCATTGACCAGGAGAGCTCAAAAGCATCGTCTGAGAGAACTCAAGCTTCAAGTCAAAGCTTTTGCTGAGAAAGAAGAAGGGGGTGACATAAAAGCTGTGTGCCTAACTTTGTTCTTGCTGGCTCTAAGAGCAAGAAATGAACACAGACAAGCAGATGAGTTGGAAGCTATAATGCAAGGGAAGGGATCAGGGCTTCACCCTGCTGTTTGCTTGGCAATCCGAGTCAACACCTTTCTCAGCTGTAGCCAGTACCATAAAATGTACAGAACTGTAAAAGCCATAACTGGGAGACAGATCTTCCAGCCACTGCATGCCCTCCGCACTGCTGAAAAGGCCCTCTTGCCTGGTTATCATCCATTTGAGTGGAAACCCCCTTTGAAAAACGTGTCCACTAATACAGAAGTGGGAATTATAGATGGGCTGTCAGGGCTGCCATACTCACTTGATGACTACCCAGTAGACACAATTGCCAAGAGGTTTCGATATGATGCAGCCTTAGTTTCAGCCTTAATGGATATGGAGGAAGACATCTTGGAAGGGATGAAGGCCAAAGACCTAGATGACTACTTGAATGGTCCCTTCACTGTGGCGGTGAAGGAATCTTGTGATGGGATGGGAGATGTCAGTGAGAAACATGGAAGTGGGCCGACTGTTCCTGAGAAGGCTGTTCGATTTTCTTTCACACTTATGAGCATCGCTGTAGCTCATGGCAATGAAAACATAAGAATCTTTGAAGAAACCAAACCTAATTCAGAGCTGTGTTGCAAACCTGTGTGTCTTATGCTGGCTGATGAATCAGACCATGAGACTCTGACAGCCATCTTGAGCCCTCTCATAGCTGAAAGAGAGGCCATGAAAAACAGTGTTCTGCTTCTTGAAATGGGAGGCATCCTCAGAACATTCAGATTCATCTTTAGAGGTACAGGGTATGATGAAAAACTTGTCCGTGAAGTGGAAGGCCTTGAAGCCTCAGGCTCTACTTATATCTGCACACTTTGTGATGCAACCCGCCTGGAAGCCTCACAGAACTTGGTCCTCCACTCTATAACAAGAAGTCATGCTGAAAACCTGGAACGGTATGAGGTATGGAGGTCCAACCCATATCATGAATCTGTTGATGAGCTACGTGACAGAGTGAAGGGTGTTTCTGCCAAACCTTTTATTGAGACGGTTCCTTCTATAGATGCATTGCACTGTGATATCGGCAATGCGGCTGAGTTCTACAAGATATTCCAGCTTGAGATTGGTGAGGTGTACAAGAATCCTGACACTTCTAAAGAAGAGAGGAAGAGGTGGCAGTCGACTCTTGACAAGCACCTCAGGAAGAAGATGAATCTGAAGCCCATAATGAGGATGAATGGAAACTTTGCTAGAAAGCTTATGACAAAAGAGACAGTAGAAGCAGTCTGTGAATTAATAAAGTGTGAGGAAAGGCATGAAGCCTTAAGAGAACTGATGGACCTTTACCTTAAGATGAAGCCAGTCTGGAGGTCTTCCTGCCCAGCCAAAGAGTGCCCAGAATTGCTGTGTCAGTATAGCTTCAACTCACAACGTTTTGCTGAGCTATTGTCCACAAAGTTCAAGTACAGATATGAGGGCAAGATTACAAATTACTTTCACAAAACTCTTGCTCATGTTCCTGAAATCATTGAAAGAGATGGCTCCATTGGGGCCTGGGCAAGTGAAGGGAATGAATCTGGGAACAAATTGTTTAGGCGTTTC????????????????????????????????????????????????????????????????????????????????????????????????????????????????????????????????????????????????????????????????????????????????????????????????????????????????????????????????????????????????????????????????????????????????????????????????????????????????????????????????????????????????????????????????????????????????????????????????????????????????????????????????????????????????????????????????????????????????????????????????????????????????????????????????????????????????????????????????????????????????????????????????????????????????????????????????????????????????????????????????????????????????????????????????????????????????????????????????????????????????????????????????????????????????????????????????????????????????????????????????????????????????????????????????????????????????????????????????????????????????????????????????????????????????????????????????????????????????????????????????????????????????????????????????????????????????????????????????????????????????????????????????????????????????????????????????????????????????????????????????????????????????????????????????????????????????????????????????????????????????????????????????????????????????????????????????????????????????????????????????????????????????????????????????????????????????????????????????????????????????????????????????????????????????????????????????????????????????????????????????????????????????????????????????????
Podocnemis_expansa		CCCTAAACCC-AGATACCCAC--TTACAAAGA-TATCCGCCAGAGAA-CTACAAGCCAAATGCTTAAAACTCAAGGGACTTGACGG-TGCCTCAAA-CCCACCTAGAGGAGCCTGTTCTATAAGCGATAATCCACGATAAACCTTACCATCTTTTGCCC-CCCAGCCTATATACCGCCGTCTCCAGCCTACCTTGTGAGAGGAA-AGAAGTAAGCACAATAGTCCA-TACAA--CTAGAACGTCAGGTCCAGGCGTAGCCAA-TGAGATGGAAGAAATGGGCTACATTTTCTAATA--TAGAAATA---GTCA-C---GGAGAGAGCCCTGAAT--A-AAGGCCTCAAAAGCAGAATTTAGCAGTAATTTT-GGAATAGTGAGCCAAAATTAAACAGGAAATGA-AGC?????????????????????????????????????????????????????????????TTAACGGSCG-CGGTATCCTGACCGTGCGAAGGTAGCATAATCGCTTGTCTTTTAAATAAAGACTAGAATGAATGGCTAAACGAG-GTTCTATCTGTCTCTTACAAA-CAATCAGTGAAATTGATCTACTCGTGCAAAAGCGAGTATTTTCCCATAAGACGAGAAGACCCTGTGGAACTTTAAGA-ACTAATCAGCCT-TCATGTAATACTACA-----CCCCACGGGACCACATCAAATTTT-----CCCCTGATTATTACTTTCGGTTGGGGCGACCTCGGAGTACAAGAAACCCTCCGAAGATAGGACAAA--ATCCACACCAAGA-ATCACACCTCAAAGTACTAGCAA-GTAAAAACGATCCAATAAATTTGATCAACGAACAAAGCTACCCCAGGGATAACAGCGCAATCCCCTTTCAGAGT-TCATATCAACAA-GGGGGTTTACGACCTCGATGTTGGATCAGGACATCCTAATGGTGCATCAGCTAATAAGGGTTCTATACTTAATCTTTGGGGCCTGAGCAGGCATAGTAGGAACTGCTTTAAGCCTACTAATCCGAGCAGAACTAAGCCAACCTGGAACTCTATTAGGAGATGACCAAACCTACAACGTTATTGTCACCGCCCATGCCTTCGTCATAATTTTCTTTATAGTAATACCGATCATAATCGGAGGATTTGGAAACTGACTAGTCCCACTAATAATTGGTGCCCCAGACATAGCATTTCCACGAATAAATAACATAAGTTTCTGACTCCTCCCACCATCACTCCTTCTCTTACTCGCTTCTGCCGTCATTGAATCTGGAGCCGGGACAGGGTGAACTGTCTACCCTCCACTAGCAAGTAATATAGCCCATGCTGGTGCTTCAGTAGACTTAACCATCTTTTCCCTTCATCTAGCTGGGGCATCATCCATCCTAGGTGCTATCAACTTCATTACCACTGCAATTAACATAAAAGCCCCATCAATAACTCAATACCATACACCATTATTCGTATGATCAGTATTAATTACTGCAGTCCTACTATTACTATCCCTACCTGTACTAGCAGCGGGTATCACAATATTACTCACCGACCGAAACCTAAACACAACATTCTTCGACCCATCCGGAGGAGGTGATCCAATCCTTTATCAACATTTA?????????????????????????????????????????????????????????????????????????GGGGGTACGGCATTGCCCGCATACCACGCATCCTTAACCCAATCAACAAATACACTATGTTACCCATTCATGATTCTCTCACTCTGAGGTATTATCATAACAGGATTGATCTGTATACGACAAACAGACCTAAAATCCTTAATTGCTTACTCATCAGTAAGCCACATAGGCCTAGTAATTGCTGCCCTACTAGTACAAACTCCATGGGCTTTTACTGGCAGCATCATCCTAATAATTGCCCACGGACTAACATCATCCATACTCTTCTGCCTGGCCAATACAAACTATGAACGAACCCATAGCCGAACATTACTACTAACCCGAAATCTACAATTACTCATACCACTAATAACCCTATGATGATTACTAGCAAGCCTAACCAACATAGCCCTTCCACCAACAATCAACCTAATAGGAGAACTTGCAATCATTACATCCCTATTTTCCTGAGCCCATACAACTATTATCCTCACAGGGCTAGGCTCACTACTAGCTGCAATCTACACACTACACATATTTTTATCAACCCAATGAGGAGGAAACTTACCTCCCCAC---CTAACATCTATCACACCATCACACACACGAGAACATCTACTCATAGCCCTCCACATTCTCCCACTAATCCTATTAATAATAAAACCTCAGCTTATCTCAAACTGTATATGTTAGCATAGTTTAACACCAAACATTAGAATGTGACTCTAAAAATAGAGG??????????????????????????????????????????????????????????????????????????????TGATGAAACTTCGGCTCTCTACTGGGAGCCTGTCTCGTACTACAGATCATAACAGGCATCTTCCTAGCAATACACTATTCACCAAACATCCACTTAGCATTCTCATCAGTCGCCCATATCACACGAGATGTACAATACGGCTGACTAATCCGCAACATACACTCAAACGGCGCTTCCATATTCTTCATCTGTCTATATTTACACATTGGACGAGGCTTCTACTACGGCTCCTTCCTTAACACAAAAACATGGAACACGGGTATTGTCCTATTATTCCTAACCATAGCCACTGCATTCATGGGCTATATCCTACCATGAGGGCAGATATCCTTCTGAGGTGCTACCGTCATTACCAACCTCCTATCAGCCATCCCCTACATTGGAAATACCCTCGTACAATGAGTGTGAGGGGGATTCTCAGTAGACAACGCTACACTTACTCGATTTTTTACATTCCACTTCCTAACCCCATTCATCATCGCAGGTATAACAATAATCCACCTTCTATTCCTCCACGAAACAGGCTCAAACAATCCAACCGGACTAAACTCAAACACCGACAAAATCCCATTCCACCCATACTTCACATACAAAGACATCCTAGGCATTGCAATCCTAATAGCATACCTCCTAACTCTATCCATATTCCTACCCAACCTCCTATCGGACCCTGAAAACTTCACACCCGCAAACCCCTTAGTCACTCCACCACATATCAAACCAGAATGATACTTCTTATTTGCCTACGCAATCCTGCGATCCATCCCAAATAAACTCGGAGGTGTTTTAGCCCTTTTCTTATCAATCGCAATCCTCGTCCTTATCCCCATACTACACACCTCCAAACAACGAACCCTCACATACCGCCCCATTTCACAAACCCTTTTCTGATACTTAGCTGCCGACCTACTCATCCTTACCTGAATCGGAGGACAACCAGTAGAAACACCATACATCCTCATCGGACAAATTGCTTCAGCCCTATACTTCACAACAATTGCCATCTTACTACCAATCGCAGGAACCATTGAAAACAA--ACTTCTC????GCAAATGAAAAGAAAGCAGAGGAGGTGGCCTCTTTGGACAAAGACATTGTGGTGCAGAAGGATGT---GGCAGTTCCAATGGCAGAAAAGCCCCTTCTGCCAGATACAGACTTAAAGTACAATAAGCAGGCTCTTGAAAAAGATGCTGACAACCTGAAAATGCAAGAGAATGCGGCTCATCAAGCAAACCTGCAGCAGCTCTGTCGCATCTGTGGAGTTTCATTTAAAACTGATCACTATAAGAGAAGTTATCCAGTGCATGGACCAGTGGACAGTGAAACTCAGGGACTTCTGAGAAAGAAAGAGAAAAGAGCAACATCTTGGCCTGATCTTATTGCTAAAGTTTTTAAGATTGATGTGCGAGGAGATATTGACATGATCCACCCCACTCGCTTTTGTCACAACTGCTGGAGCATCATCCATAGAAAGTTCAGCAATGCACCATGTGAAGTATATTTCCCAAGGAACAATACCATGGAATGGGAGTCCCACTCCCCAAATTGCACTGTTTGCTTCACGGCTCAGCGTGGGATCAAGAGAAAGAATCAGTCATCCAACTTGCTGCTCAGCAAAAGGTTGAAGATGATTGCAGAACATGCCCAAAAAACTAAAAGTGTAAAAAAACCACAAGCACAGATGAAAAATAAAAACCTGATGAAAAAGATTGCCAACTGCAAAAAGACACATCTTAGTACTAAACTTCTTGCAGTTGACTACCCTGCTGATTTCATTAA-GTCCATCTCTTGCCAGGTCTGTGAGCATATTCTGGCAGATCCAGTGGAAACAACATGTAGCCACTTGTTCTGTAGAACCTGCATCCTGAAGTGCCTGAAAGTTATGGGCAGCTATTGTCCCTCCTGCCGATACCCTTGCTTCCCTACCGACTTGGAGAGTCCAGTGAAATCCTTTCTGAACATCCTCAATTCCTTGGCTATACGCTGTCCAGTGAAAGAATGTGATGAGGAGGTTTTGCTGGGTAAATACTGCCATCATTTGTCCATTCACAAAGAAGTGAAAAGAAAAGAAATTTACACACACATAAACAAAGGCGGCAGACCAAGGCAACACTTACTGTCATTGACCAGGAGAGCTCAAAAGCATCGTCTGAGAGAACTCAAGCTTCAAGTCAAAGCTTTTGCTGAGAAAGAAGAAGGGGGTGACATAAAAGCTGTGTGCCTAACTTTGTTCTTGCTGGCTCTAAGAGCAAGAAATGAACACAGACAAGCAGATGAGTTGGAAGCTATAATGCAAGGGAAGGGATCAGGGCTTCACCCTGCTGTTTGCTTGGCAATCCGAGTCAACACCTTTCTCAGCTGTAGCCAGTACCATAAAATGTACAGAACTGTAAAAGCCATAACTGGGAGACAGATCTTCCAGCCACTGCATGCCCTCCGCACTGCTGAAAAGGCCCTCTTGCCAGGTTATCATCCATTTGAGTGGAAACCCCCTTTGAAAAACGTGTCCACTAATACAGAAGTGGGAATTATAGATGGGCTGTCAGGGCTGCCATACTCAGTTGATGACTACCCAGTGGACACAATTGCCAAGAGGTTTCGATATGATGCAGCCTTAGTTTCAGCCTTAATGGATATGGAGGAAGACATCTTGGAAGGGATGAAGGCCAAAGACCTAGATGACTACTTGAATGGTCCCTTCACTGTGGTGGTGAAGGAATCTTGTGATGGGATGGGAGATGTCAGTGAGAAACATGGAAGTGGGCCAACTGTTCCTGAGAAGGCCGTTCGATTTTCTTTCACACTTATGACCATCGCTGTAGCTCATAGCAATGAAAACGTGAGAATCTTTGAAGAAACCAAACCTAATTCAGAGCTGTGTTGCAAACCCGTGTGTCTTATGCTGGCTGATGAATCGGACCATGAGACTCTGACAGCCATCTTGAGCCCTCTCATAGCTGAAAGAGAGGCCATGAAAAACAGTGTTCTGCTTCTTGAAATGGGAGGCATCCTCAGAACATTCAGATTCATCTTTAGAGGTACAGGGTATGATGAAAAACTTGTCCGTGAAGTGGAAGGCCTTGAAGCCTCAGGCTCTACTTATATCTGCACACTTTGTGATGCAACCCGCCTGGAAGCCTCACAGAACTTGGTCCTCCACTCCATAACAAGAAGTCATGCTGAAAACCTGGAACGGTATGAGGTATGGAGGTCCAACCCATATCATGAATCTGTTGATGAGCTACGTGACAGAGTGAAGGGTGTTTCTGCCAAACCTTTTATTGAGACGGTTCCTTCTATAGATGCATTGCACTGTGATATCGGCAATGCGGCTGAGTTCTACAAGATATTCCAGTTTGAGATTGGTGAGGTGTACAAGAATCCTGACACTTCTAAAGAAGAGAGGAAGAGGTGGCAGTCAACTCTTGACAAGCACCTCAGGAAGAAGATGAATCTGAAGCCCATCATGAGGATGAATGGAAACTTTGCTAGAAAGCTTATGACAAAAGAGACAGTAGAAGCAGTCTGTGAATTAATAAAGTGTGAGGAAAGGCATGAAGCCTTAAGAGAACTGATGGACCTTTACCTTAAGATGAAGCCAGTCTGGAGGTCTTCTTGCCCAGCCAAAGAGTGCCCAGAATTGCTGTGTCAGTATAGCTTCAACTCACAACGTTTTGCTGAGCTATTGTCCACAAAGTTCAAGTACAGATATGAGGGCAAGATTACAAATTACTTTCACAAAACTCTTGCTCATGTTCCTGAAATCATTGAAAGAGATGGCTCCATTGGGGCCTGGGCAAGTGAAGGGAATGAGTCTGGGAACAAATTGTTTAGGCGTTTCTGCAGCAAGAACCGGCTAGCATCACGGCAAAGCTTCTGGGCTGAGCTGAACGTGGCCCGGCTACACCATGATAATGTGGTACGTGTTGTAGCTGCCAGCACTTGTGCCCCTGCTAACCAAGAGAGTCTGGGCACCATAATCATGGAATATGCAGGCCGTACTACCTTACACCATGTCATCTATGGCACTGGCTGCCTGCAGGGAACGGGAGAAGATGACAGGGGTGGATGTGGCAAGGCACCCTTAAGCATTGCTGAGTCCCTGGGTTATTCCTCTGACATTGTGACTGGCTTAGTCTTCCTACACTCACAGTACATTGTGCACCTCGACTTGAAGCCTGCTAATGTGTTCATCACTGAGCAGGG???????????????????????????????????????????????????????????????????????????????????????????????????????????????????????????????????????????????????????????????????????????????????????????????????????????????????????????????????????????????????????????????????????????????????????????????????????????????????????????????????????????????????????????????????????????????????????????????????????????????????????????????????????????????????????????????????????????????????????????????????????????????????????????????????????????????????????????????????????????????????????????????????????????????????????????????????????????????????????????????????????????????????????????????????????????????????????????????????????????????????????????????????????????????????????????????????????????????????????????????????????????????????????????????????????????????????????????????????????????????????????????????????????????????????????????????????????????????????????????????????????????????????????????????????????????????????????????????????????????????????????????????????????????????????????????????????????????????????????
Pelomedusa_subrufa		CCCTAANCCA-TGATATTTAACATAACACAAA-TATCCGCCCGAGAA-CTACGAGCCTACAGCTTAAAACTTAAGGGACTTGGCGG-TGTCCCATA-CCCAACTAGAGGAGCCTGTTCTATAAGCGATTATCCACGATCAACCTTACCACCCTTTGCCA-TCCAGCCTATATACCGCCGTCTAAAGCTCACCTTATGAAAGCTA-AAAAGTAAGCAAAATAGCT-ACTACAG--CTAGAAAGTCAGGTCCAGGTGTAGCCAA-TAGGGTGGATGTAATGGGCTACATTTTCTAAAA--TAGAAATA---TTCA-C---GGACAGACCCTTGAAA--C-AGGGACTAATAAGTTGGATTTAGCAGTAATCTA-AGAATAGAAAGCCTATATTAAACCGGCCCTGG-GAC?????????????????????????????????AGAGGTAGTGCCTGCCCAGTGATTT-ATTAAACGGCCG-CGGTAACATGACCGCGCGAAGGTAGCATAATCACTTGTCTTTTAAATAAAGACTGGAATGAATGGCTACACGAG-GTTCTATCTGTCTCTTACAAA-CAATCAGTGAAATTGATCTCCTCGTGCAAAAGCGAGAATACCCACATAAGACGAGAAGACCCTGTGGAACTTCAAGT-ATTAACCAACAT-ACTTCCTCATCTCTAC----CCTAAGGGAAAAAAC--AAGCCGAAGTATCCCCTGGTTATTGCTTTTGGTTGGGGCGACCTCGGAGCAAAACAAAACCTCCGAAAAGAGTATATT---CTCATACCAAGA-ATTACACCTCAAAGTGCC-TTAAAGCA-AAACGATCCAATATATTTGATCAACGAACAAAGCTACCCCAGGGATAACAGCGCAATCCCTTCTTAAAGT-CCATATTGACGATGGGGGTTTACGACCTCGATGTTGGATCAGGACATCCTGATGGTGCAGCAGCTATTAAGGGTTCTTTACCTAATCTTTGGGGCCTGAGCAGGAATAATTGGTACCGCCCTTAGCCTCCTCATTCGAACTGAACTTAATCAACCTGGAAATCTCCTAGGTAGCGACCAAACCTACAACGTTATCGTCACAGCCCATGCATTCATCATAATCTTCTTTATAGTAATACCAGTTATGATTGGAGGATTCGGAAACTGATTAATCCCTTTAATAATCGGAGCTCCAGACATAGCATTCCCACGCCTAAACAACATGAGCTTCTGACTATTACCCCCATCATTAATTCTCATACTTGCCTCCTCTACAATTGAAGCAGGGGCGGGAACAGGTTGAACAGTCTACCCCCCTTTAGCAGGCAACCTCGCCCATGCTGGTGCATCCGTGGACCTAGCCATCTTCTCCTTACATCTAGCAGGAGCATCCTCCATCCTAGGAGCCATTAATTTCATCACTACAGTAATTAACATAAAAACTCCAAACATATCCTTCCTTGACATACCACTATTTGTTTGATCTGTACTAATTACAGCTGTCTTATTACTCTTATCTCTCCCAGTACTTGCAGCAGGTATTACTATACTCCTAACAGACCGAAACCTAAACACAACATTCTTTGACCCTTCAGGGGGAGGAGACCCAATCCTATATCAACATCTA??????????????????????????????????????????????????????????????????????????????????????????????????????????????????????????????????????????????????????????????????????????????????????????????????????????????????????????????????????????????????????????????????????????????????????????????????????????????????????????????????????????????????????????????????????????????????????????????????????????????????????????????????????????????????????????????????????????????????????????????????????????????????????????????????????????????????????????????????????????????????????????????????????????????????????????????????????????????CCCCAT---ATAAACACTATCACCCCATCCCATACACGAGAACACTTAATTATAATACTCCACATCACCCCCTTAATCCTTCTAATAATAAAACCCCAACTCAT----AACCTTTT--GTTAATATAGTTTCAACACAAACATTAGAATGTGAGCCTAAAAATAGAGA????????????????????????????????????????????????????????????????????????????????????????????????????????????????????????????????????????????????????????????????????????????????????????????????????????????????????????????????????????????????????????????????????????????????????????????????????????????????????????????????????????????????????????????????????????????????????????????????????????????????????????????????????????????????????????????????????????????????????????????????????????????????????????????????????????????????????????????????????????????????CGGCTTCACTTCAATTCACCTTTTATTCCTTCACGAAACAGGCTCCAACAACCCCACAGGACTCAACTCCAACTCCGACAAAATTCCATTCCATCCCTACTTCTCATACAAAGATCTTCTAGGAGTAAACCTACTCATAATAGGACTATTAACCCTAACCCTCTTTCTACCTAATTTACTAACAGACCCAGAAAACTTCACCCCAGCCAATCCCTTAGTTACCCCCCCCCACATTAAACCTGAATGATACTTCCTCTTTGCCTACGCAATCCTACGCTCCATCCCTAACAAACTAGGCGGAGTACTAGCCCTCCTGGCCTCAGTAGCCATCCTCTTCCTTATACCTGTATTACACACTTCCAAACAACGATCAGCTACCTTCCGACCCTTCACACAAACCCTACTCTGATCTTTAACCGCCGATCTAATTATTCTCACCTGAATCGGAGCCCAACCTGTAGAAAACCCATTTATCACAATCGGACAAGCAGCCTCTATCTTCTACTTCACCCTAATCCTCCTTCTAATTCCCCTAACAGCCACCCTCGAAAACAA--ACTCCTCAATTGCAAATAAAAAGAAAGCAGAGGAGGTGTCCCCTTTGGACAAAGGCATTGTGGTGCAGATGGATGC---GGCAGTTCCAGTGGCAAAAAAGCCACCTCTGGCTGATACAGACTTAAAGTACAACAAGCAGGCTCTTGAGAAAGATGCTGACAACCTGAAAATGCAAGAGAATGCAGCTCATCATGCAAATCTGCAGCAGCTCTGTCGCATCTGTGGAGTTTCATTTAAAACTGATCGCTACAAGAGAAGTCATCCAGTGCATGGACCAGTGGACAGTGAAACTCAGGGACTTCTGAGAAAGAAAGAGAAAAGAGCCACATCTTGGCCTGACCTCATTGCCAAAGTTTTTAAGATTGACGTGAGAGGAGATATTGACACGATCCACCCCACTCGCTTTTGTCACAACTGCTGGAGCATCATCCATAGAAAGTTCAGCAATGCACCATGTGAAGTATATTTCCCGAGGAACAGCACCATGGAGTGGCAGTCCCACTCCCCAAGCTGCACTGTTTGTGACACTGCTCAGCGTGGGATCAAGAGAAAGAAACAGTCATCCAACTTGCAGCTCAGCAAAAGGTTGAAGATCATTGCAGAACACGCCCGAAAAACTAAAAGTGTAAAAAGA---CAAGCACAGGTGAATAACAAAAACCTTATGAAAAAGATTGCCAACTGCAAAAAGATACATCTTAGCACTAAACTTCTTGCAGTTGACTATCCTGCAGATTTCATTAA-GTCCATCTCTTGCCAGATCTGTGAGCATATTCTGGCAGATCCAGTGGAAACAACATGTAGCCATTTGTTCTGCAGAACCTGCATCCTGAAGTGCCTAAAAGTTATGGGCAGCTATTGTCCCTCCTGCCGATACCCTTGCTTCCCTACCGACTTGGAGAGCCCAGTGAAATCCTTTTTGAACATTCTCAATTCCTTGCCTGTGCGTTGCCCAGTGAAAGAATGTGATGAGGAGGTTTTGCTGGGTAAATATTGCCATCATTTGACCAGTCACAAAGAGGTGAAAGGGAAAGAGATTTACACGCACATAAATAAAGGTGGCAGACCAAGGCAACACTTGCTGTCATTGACGAGGAGAGCTCAAAAGCATCGCCTGAGAGAACTCAAGCTTCAAGTCAAAGCTTTTGCTGAGAAAGAAGAAGGAGGTGATATAAAGGCTGTGTGCCTAACTTTGTTCTTGCTGGCTCTAAGAGCAAGAAATGAACACAGACAAGCAGATGAGTTGGAAGCTATAATGCAAGGGAAGGGATCAGGGCTTCACCCAGCTGTTTGCTTGGCAATCCGAGTCAACACCTTTCTCAGCTGTAGCCAGTACCATAAAATGTACAGAACTGTAAAAGCTATAACTGGGAGGCAGATCTTCCAGCCACTGCATGCTCTCCGCACTGCTGAAAAGGCCCTCTTGCCAGGTTATCATCCGTTTGAGTGGAAACCCCCTTTGAAAAATGTATCCACTAATACAGAAGTGGGAATTATAGATGGGCTGTCAGGGCTGCCACACTCAGTTGATGACTACCCAGTAGACACGATTGCCAAGAGGTTTCGGTATGATGCAGCCTTAGTTTCTACCTTAATGGACATGGAGGAAGACATCTTGGAAGGAATGAAGGCCCAAGACCTGGATGACTACTTGAATGGTCCCTTCACTGTGGTGGTGAAGGAATCTTGTGATGGGATGGGAGATGTCAGTGAGAAACATGGAAGTGGGCCGGCTGTTCCTGAGAAGGCAGTTCGATTTTCTTTCACACTCATGAGCATCACTATAACTCATGACAATGAAAATGTAAGGATCTTTGAAGAAACCAAACCTAATTCAGAGCTGTGTTGCAAACCCCTGTGTCTTATGCTGGCTGATGAATCAGACCATGAGACTCTCACAGCTATCTTGAGCCCTGTCATAGCAGAAAGAGAGACCATGAAAAACAGTCTCCTGCTTCTTGAAATGGGAGGCATCCTCAGAACATTCAAATTCATCTTTAGGGGTACAGGGTATGATGAGAAACTTGTCCGTGAAGTGGAAGGCCTTGAAGCCTCAGGCTCTACTTACATCTGCACCCTTTGTGATGCAACCCGCCTGGAAGCCTCTCAGAACTTGGTCCTCCACTCCATAACAAGAAGTCATGCTGAAAACCTGGAACGGTATGAGGTATGGAGGTCCAACCCATATCATGAATCTGTTGATGAGCTACGTGACAGAGTGAAGGGTGTTTCTGCCAAACCTTTTATTGAGACAGTTCCTTCCATAGATGCATTGCATTGTGACATCGGCAATGCAGCTGAATTCTACAAGATATTCCAGTTTGAGATAGGTGAGGTGTACAAGAACCCTGACGCATCTAAAGAAGAGAGGAAGAGGTGGCAGTCGACTCTTGACAAGCACCTCAGGAAGAAGATGAATCTGAAGCCCATAATGAGGATGAATGGAAACTTTGCTAGAAAACTTATGACCAAAGAGACAGTGGAAGCAGTCTGTGAATTAATAAAGTGTGAGGAAAGGCATGAAGCCTTAAGAGAACTGATGGACCTTTACCTTAAGATGAAACCAGTGTGGAGGTCTTCCTGCCCAGCCAAAGAGTGCCCAGAATTGTTGTGTCAGTATAGCTTCAACTCACAACGTTTTGCTGAGCTCCTATCCACAAAGTTCAAGTACAGATATGAGGGCAAGATTACGAATTACTTTCACAAAACTCTTGCTCATGTTCCTGAAATCATTGAAAGAGATGGCTCCATTGGGGCGTGGGCAAGTGAAGGGAACGAGTCTGGGAACAAATTGTTTAGGCGTTTCTGCAGCAAGAACCGGCTGGCATCGCGGCAAAGCTTCTGGGCTGAGCTGAACGTGGCCCGGCTACACCATAACAATGTGGTACGTGTTGTAGCTGCCAGCACTAGCGCTCCTGCCAACCAAGACAGCCTGGGAACCATAATCATGGAATATGCGGGCCAGACGACCCTGCACCACGTCATCTATGGCACTGGCTGCCTGCAGGGAAAGGGAGAGGATGATGGGGGGGCCTGTGGCAAGGCACCCTTAAGCATTGCTGAGTCCCTGGGTTATTCTTCTGAGATTGTGACTGGCTTAGTCTTCCTCCACTCCCAGTGCATTGTGCACCTCGACTTGAAGCCTGCTAATGTGTTCATCACCGAGCAGGG???????????????????????????????????????????????????????????????????????????????????????????????????????????????????????????????????????????????????????????????????????????????????????????????????????????????????????????????????????????????????????????????????????????????????????????????????????????????????????????????????????????????????????????????????????????????????????????????????????????????????????????????????????????????????????????????????????????????????????????????????????????????????????????????????????????????????????????????????????????????????????????????????????????????????????????????????????????????????????????????????????????????????????????????????????????????????????????????????????????????????????????????????????????????????????????????????????????????????????????????????????????????????????????????????????????????????????????????????????????????????????????????????????????????????????????????????????????????????????????????????????????????????????????????????????????????????????????????????????????????????????????????????????????????????????????????????????????????????????
Peltocephalus_dumerilianus	CCCTAAACAT-TGATATCTAT--TTACATAGA-CATCCGCCAGAGAA-CTACGAGC-ACCCGCTTGAAACTCAAAGGACTTGGCGG-TGTCTTAAA-CCCATCTAGAGGAGCCTGTTCTATAAGCGACAACACACGATAAACCTTACCACCTCTCGC-C-ATCAGCCTATATACCGCCGCCGCCAGCCTACCTTGTGAAAGCAC-ATAAGTAAGCGAAATAGTATA-AACCA--CTAATAAGTCAGGTCCAGGTGTAGCCAA-TGAGGTGGCAGAAATGGGCTACATTTTCTAAAA--TAGAAATA---TTTAAC---GGAGAGACTCCTGAAA--T-AAGATCTCTAAAGCAGGATTTAGCAGTAATTTT-GGAATAGAGAGCCAAAATGAAACAGGCAATGA-GAC?????????????????????????????????????????????????????????????TAAACGGCCG-CGGTACCYTGACCGTGCGAAGGTAGCATAATCACTTGTCTTCTAAATAAAGACTAGAATGAAAGGCTAAACGAG-GTTCTACCTGTCTCCTACAAC-CAATCAGTGAAATTGATCTGYCCGTKCAAAAKCGGGCATMACCCCATAAGACGAGAAGACCCTGTGGRACTTCAAGA-AATAATCARCCAATMAGCCACACCAAACCG---CCCTACGGGACGACACAAACCACAA----CCTCTGATTACAACTTTCGGTTGGGGCGACCTCGGAGCACAAAAAACCCTCCGAAAATAGGACACC-ACTCCACACAAAGA-TCAACACACCAAGTGCAAATTMAARCAGAAACGATCCAATAAACTTGATAAACGAACAAAGCTACCCCAGGGATAACAGCGCAATCCCCTCCCAGAGM-CCATATCAACAA-GGGGRTTTACGACCTCGATGTTGGTTCAGGACATCCTAATGGTG???????????????????TATATCTAATCTTCGGTGCCTGAGCAGGAATAATTGGCACAGCCCTAAGCCTACTAATTCGAGCAGAACTAAGTCAACCAGGAACCCTCCTAGGAGACGACCAAACCTACAACATTATCGTTACAGCCCACGCATTTGTCATAATCTTCTTTATAGTGATACCAATTATAATTGGAGGATTCGGAAACTGACTAGTTCCACTGATAATTGGCGCCCCAGACATAGCATTTCCACGAATAAATAACATAAGTTTCTGACTCCTTCCACCATCATTATTACTACTAATCTCCTCATCCGCTATTGAATCAGGGGCCGGAACAGGCTGAACAGTCTATCCACCCCTTGCAAGCAATCTAGCCCATGCTGGCGCCTCGGTAGACCTAACTATCTTTTCACTACACCTAGCTGGAGCATCATCAATTCTAGGTGCAATCAACTTCATTACAACCACAATTAACATAAAAGCCCCACACATATCCCAATACTACATCCCACTGTTCGTCTGATCAGTACTAATTACTGCAGTGCTCCTACTACTATCCCTCCCAGTACTAGCAGCTGGAATCACAATACTACTAACAGACCGAAACCTTAACACAACATTCTTCGACCCCTCTGGTGGAGGAGATCCAATCCTATATCAACATCTA?????????????????????????????????????????????????????????????????????????GGGGGTACGGAATCAACCGAGTACCACACATTCTTAATCCAATTAACAAAAACCCTATATTACCCATTCATAATCCTAGCCTTATGGGGAATAGTCATAACAAGCCTAATCTGCTTACGACAAACAGACCTTAAAGCTCTAATTGCTTACTCATCAATTGGCCATATAGGACTTGTAATTGCCTCAACACTAGTACAAACCCCATGATCATTCTCAGGCAGTATCATCCTAATAATTGCTCATGGACTTACATCATCACTGTTATTCTGCTTGGCTAACACAAACTACGAACGAACCCATAATCGAACCCTCCTCCTCTCACGAAACCAACAACTAATACTACCACTAATAACCGTCTGATGACTATTAGCCATTATAACAAACATAGCAATACCACCAACAATTAACCTTATAGGTGAATTAACAATAATTATGTCCCTATTCACCTGATCTCACCTAACCATCCTAATCACAGGACCAAGCACTCTACTAACAGCAATCTACTCCCTACACATATTCATCTCCACTCAGTGAGGCGGCAACATACCACAACAC---CTAAAAACACTCACACCCACGCAAACACGAGAGCATTTACTTATAATCTTACATTTGCTACCGCTACTCCTACTGATAATAAAACCTCAATTAATCTCAAACAACACATGTTAACATAGTTTAACACAAAACATTAGAGCGTGAATCTAAAGATAGAGG??????????????????????????????????????????????????????????????????????????????TGATGAAACTTCGGGTCCCTACTAGGACTTTGCCTACTGCTACAAATCACAACAGGCATATTCCTAGCCATACACTACTCACCCAACATCCAACTAGCATTCTCATCAATCGCACATATTACACGAGACGTCCAATATGGCTGACTTATTCGAAACCTACACGCCAACGGGGCATCAATATTCTTTGCCTGCATCTTTCTACACATTGGACGAGGAATCTACTACGGTTCATTCATAAACACAAAAACATGGAACTCAGGCATTATCCTACTACTTCTAACAATAATAACCGCATTTATAGGGTACATCCTACCATGAGGTCAAATATCATTCTGAGGGGCCACCGTCATCACCAACCTCTTATCAGCCATTCCATACATTGGCACTACCCTAGTACAATGAGTATGAGGAGGATTCTCAGTAGACAATGCAACTCTAAATCGATTCTTCACACTTCATTTCTTAATACCATTCCTAATCTCAGGCCTAACCTTAATCCACCTAACATTTCTACACGACACAGGATCAAACAACCCAACAGGCCTAAACTCAAACACAGACAAAGTTCCATTTCACCCATATTTCTCCTACAAAGACCTCCTAGGTGTAGCCATCATAATATCACTACTACTAATACTATCAATATTTCTACCAAACCTTCTAACAGACCCAGAAAACTACACCCCAGCCAACCCATTAATCACTCCCCCACATATCAAGCCAGAGTGATACTTCCTATTCGCATACACAATCCTACGATCAATCCCAAACAAACTTGGAGGAGTACTAGCCCTAATTATATCAATTATAATTCTACTACTTATCCCCACACTACACACATCCAAACAACGAACAATATCATATCGCCCAATTTCACAAACCGCATTCTGATTACTCTCTGCCAACCTAATAATCCTCACCTGAATTGGAGGACAACCAGTGGAAACACCATACACCATAATTGGTCAAGTAGCCTCAATAATATACTTCACTACAGTCCTAATCCTATTTCCAATCGCAGGTAAAATAGAAAACAT--TCTACTT?????????????????????????????????????????????????????????????????????????????????????????????????????????????????????????????????????????????????????????????????????????????????????????????????????????????????????????????????????????????????????????????????????????????????????????????????????????????????????????????????????????????????????????????????????????????????????????????????????????????????????????????????????????????????????????????????????????????????????????????????????????????????????????????????????????????????????????????????????????????????????????????????????????????????????????????????????????????????????????????????????????????????????????????????????????????????????????????????????????????????????????????????????????????????????????????????????????????????????????????????????????????????????????????????????????????????????????????????????????????????????????????????????????????????????????????????????????????????????????????????????????????????????????????????????????????????????????????????????????????????????????????????????????????????????????????????????????????????????????????????????????????????????????????????????????????????????????????????????????????????????????????????????????????????????????????????????????????????????????????????????????????????????????????????????????????????????????????????????????????????????????????????????????????????????????????????????????????????????????????????????????????????????????????????????????????????????????????????????????????????????????????????????????????????????????????????????????????????????????????????????????????????????????????????????????????????????????????????????????????????????????????????????????????????????????????????????????????????????????????????????????????????????????????????????????????????????????????????????????????????????????????????????????????????????????????????????????????????????????????????????????????????????????????????????????????????????????????????????????????????????????????????????????????????????????????????????????????????????????????????????????????????????????????????????????????????????????????????????????????????????????????????????????????????????????????????????????????????????????????????????????????????????????????????????????????????????????????????????????????????????????????????????????????????????????????????????????????????????????????????????????????????????????????????????????????????????????????????????????????????????????????????????????????????????????????????????????????????????????????????????????????????????????????????????????????????????????????????????????????????????????????????????????????????????????????????????????????????????????????????????????????????????????????????????????????????????????????????????????????????????????????????????????????????????????????????????????????????????????????????????????????????????????????????????????????????????????????????????????????????????????????????????????????????????????????????????????????????????????????????????????????????????????????????????????????????????????????????????????????????????????????????????????????????????????????????????????????????????????????????????????????????????????????????????????????????????????????????????????????????????????????????????????????????????????????????????????????????????????????????????????????????????????????????????????????????????????????????????????????????????????????????????????????????????????????????????????????????????????????????????????????????????????????????????????????????????????????????????????????????????????????????????????????????????????????????????????????????????????????????????????????????????????????????????????????????????????????????????????????????????????????????????????????????????????????????????????????????????????????????????????????????????????????????????????????????????????????????????????????????????????????????????????????????????????????????????????????????????????????????????????????????????????????????????????????????????????????????????????????????????????????????????????????????????????????????????????????????????????????????????????????????????????????????????????????????????????????????????????????????????????????????????????????????????
[truncated: 8,309 more chars]
